# Supplementary material for: Dynamic Transcription of Long Non-Coding RNA Genes during CD4+ T Cell Development and Activation
Source: PLoS One. 2014 Jul 8;9(7):e101588. doi: 10.1371/journal.pone.0101588 (PMC4086894; doi:10.1371/journal.pone.0101588)
Supplement: Table S17 — CD4+ VS. DP LncRNA-mRNAs pairs with the expression of LncRNAs and mRNAs were positively and LncRNA sequence matched downstream of the mRNA. (CSV) [file pone.0101588.s017.csv]

gene id	gene regulation	lncRNA id	lncRNA regulation	PCC	pvalue	lncRNA Name	lncRNA Size	lncRNA Start	lncRNA End	gene Name	gene Size	gene Start	gene End	matches	misMatches	strand
NM_175933	up	uc009hxj.1	up	0.7857143	0.005505952	uc009hxj.1	150635	148955	148993	NM_175933	1000	940	980	37	0	+
NM_175933	up	uc009hxj.1	up	0.7857143	0.005505952	uc009hxj.1	150635	37121	37268	NM_175933	1000	845	991	135	10	-
NM_144813	up	uc009hxj.1	up	0.8571429	0.001736111	uc009hxj.1	150635	11042	11128	NM_144813	1000	900	986	81	5	+
NM_144813	up	uc009hxj.1	up	0.8571429	0.001736111	uc009hxj.1	150635	37121	37238	NM_144813	1000	100	217	109	8	-
NM_144813	up	uc009hxj.1	up	0.8571429	0.001736111	uc009hxj.1	150635	99880	99981	NM_144813	1000	899	1000	92	9	-
NM_011496	up	uc009hxj.1	up	0.7857143	0.005505952	uc009hxj.1	150635	37150	37272	NM_011496	1000	797	921	112	10	+
NM_011496	up	uc009hxj.1	up	0.7857143	0.005505952	uc009hxj.1	150635	101447	101540	NM_011496	1000	517	600	82	0	-
NM_178619	up	uc009hxj.1	up	0.7142857	0.0141369	uc009hxj.1	150635	37144	37249	NM_178619	1000	618	723	98	7	+
NM_178619	up	uc009hxj.1	up	0.7142857	0.0141369	uc009hxj.1	150635	73959	107773	NM_178619	1000	86	145	58	1	+
NM_178619	up	uc009hxj.1	up	0.7142857	0.0141369	uc009hxj.1	150635	74906	74949	NM_178619	1000	102	145	43	0	-
NM_030725	up	uc009hxj.1	up	0.7142857	0.0141369	uc009hxj.1	150635	59800	59852	NM_030725	1000	114	166	48	4	+
NM_030725	up	uc009hxj.1	up	0.7142857	0.0141369	uc009hxj.1	150635	59838	59897	NM_030725	1000	110	477	50	3	+
NM_030725	up	uc009hxj.1	up	0.7142857	0.0141369	uc009hxj.1	150635	59800	59838	NM_030725	1000	128	166	35	3	+
NM_030725	up	uc009hxj.1	up	0.7142857	0.0141369	uc009hxj.1	150635	103198	116291	NM_030725	1000	107	368	86	1	-
NM_030725	up	uc009hxj.1	up	0.7142857	0.0141369	uc009hxj.1	150635	12378	74177	NM_030725	1000	107	349	96	2	-
NM_030725	up	uc009hxj.1	up	0.7142857	0.0141369	uc009hxj.1	150635	89127	89258	NM_030725	1000	107	369	76	3	-
NM_026280	up	uc009hxj.1	up	0.6428571	0.03115079	uc009hxj.1	150635	110409	110453	NM_026280	1000	63	107	42	2	+
NM_024184	up	uc009hxj.1	up	0.9285714	0.000396825	uc009hxj.1	150635	37137	37272	NM_024184	1000	222	359	124	11	+
NM_024184	up	uc009hxj.1	up	0.9285714	0.000396825	uc009hxj.1	150635	1339	1440	NM_024184	1000	222	323	94	7	+
NM_010892	up	uc009hxj.1	up	0.7142857	0.0141369	uc009hxj.1	150635	45793	45872	NM_010892	1000	739	818	48	0	+
NM_001162539	up	uc009hxj.1	up	0.6428571	0.03115079	uc009hxj.1	150635	116360	116411	NM_001162539	1000	516	566	50	0	+
NM_001162539	up	uc009hxj.1	up	0.6428571	0.03115079	uc009hxj.1	150635	53701	53775	NM_001162539	1000	523	616	51	1	+
NM_001033266	up	uc009hxj.1	up	0.6428571	0.03115079	uc009hxj.1	150635	53723	53796	NM_001033266	1000	201	261	58	2	+
NM_001033266	up	uc009hxj.1	up	0.6428571	0.03115079	uc009hxj.1	150635	91028	91060	NM_001033266	1000	201	233	32	0	+
NM_001033266	up	uc009hxj.1	up	0.6428571	0.03115079	uc009hxj.1	150635	53706	53738	NM_001033266	1000	230	262	32	0	+
NM_001013749	up	uc009hxj.1	up	0.7857143	0.005505952	uc009hxj.1	150635	116357	116404	NM_001013749	1000	152	229	46	1	+
NM_001013749	up	uc009hxj.1	up	0.7857143	0.005505952	uc009hxj.1	150635	53718	53796	NM_001013749	1000	151	228	51	0	+
NM_001013749	up	uc009hxj.1	up	0.7857143	0.005505952	uc009hxj.1	150635	53293	53339	NM_001013749	1000	151	224	43	0	-
NM_001013749	up	uc009hxj.1	up	0.7857143	0.005505952	uc009hxj.1	150635	12420	18758	NM_001013749	1000	148	228	56	1	-
NM_177619	up	uc009hxj.1	up	0.7857143	0.005505952	uc009hxj.1	150635	37128	37277	NM_177619	1000	314	464	136	13	-
NM_025674	up	uc009hxj.1	up	0.7857143	0.005505952	uc009hxj.1	150635	37123	37251	NM_025674	1000	816	948	117	10	-
NM_176830	up	uc009hxj.1	up	0.8571429	0.001736111	uc009hxj.1	150635	37172	37256	NM_176830	1000	915	1000	79	5	-
NM_176830	up	uc009hxj.1	up	0.8571429	0.001736111	uc009hxj.1	150635	1374	1442	NM_176830	1000	931	1000	64	4	-
NM_021482	up	uc009hxj.1	up	0.7142857	0.0141369	uc009hxj.1	150635	123039	123071	NM_021482	1000	36	68	31	1	-
NM_001141976	up	uc009hxj.1	up	0.6428571	0.03115079	uc009hxj.1	150635	14737	14793	NM_001141976	1000	0	56	53	3	-
NM_001141975	up	uc009hxj.1	up	0.8571429	0.001736111	uc009hxj.1	150635	14737	14793	NM_001141975	1000	0	56	53	3	-
NM_009052	up	AK138103	up	0.7857143	0.005505952	AK138103	1418	923	1051	NM_009052	1000	161	335	88	3	+
NM_001168693	up	ENSMUST00000143564	up	0.6428571	0.03115079	ENSMUST00000143564	37679	11347	11414	NM_001168693	1000	737	807	49	1	-
NM_001013390	up	ENSMUST00000143564	up	0.7857143	0.005505952	ENSMUST00000143564	37679	902	33335	NM_001013390	1000	707	835	71	0	-
NM_001038499	up	AK138784	up	0.7142857	0.0141369	AK138784	3815	1170	1229	NM_001038499	1000	811	860	47	1	+
NM_001033266	up	AK138784	up	1	4.96E-05	AK138784	3815	1194	1230	NM_001033266	1000	226	262	35	1	+
NM_025401	up	uc008hln.1	up	0.7142857	0.0141369	uc008hln.1	2602	213	355	NM_025401	1000	399	545	123	10	+
NM_001177659	up	uc008hln.1	up	0.8571429	0.001736111	uc008hln.1	2602	224	342	NM_001177659	1000	533	649	99	5	+
NM_178619	up	uc009axr.1	up	0.6428571	0.03115079	uc009axr.1	16717	10524	14427	NM_178619	1000	86	960	98	0	-
NM_177619	up	AK079976	up	0.6428571	0.03115079	AK079976	853	779	829	NM_177619	1000	370	417	46	1	+
NM_144813	up	AK079976	up	0.7142857	0.0141369	AK079976	853	776	829	NM_144813	1000	113	163	49	1	+
NM_178619	up	AK079976	up	0.8571429	0.001736111	AK079976	853	744	829	NM_178619	1000	649	731	64	1	-
NM_025674	up	uc008acg.1	up	0.6428571	0.03115079	uc008acg.1	1291	279	406	NM_025674	1000	812	943	58	2	+
NM_001038499	up	ENSMUST00000123094	up	0.6428571	0.03115079	ENSMUST00000123094	3012	2140	2172	NM_001038499	1000	811	843	31	1	+
NM_001013749	up	ENSMUST00000123094	up	0.7857143	0.005505952	ENSMUST00000123094	3012	666	1192	NM_001013749	1000	164	228	55	1	+
NM_176830	up	ENSMUST00000123155	up	0.7142857	0.0141369	ENSMUST00000123155	17431	13851	13883	NM_176830	1000	968	1000	32	0	+
NM_177619	up	ENSMUST00000123155	up	0.6428571	0.03115079	ENSMUST00000123155	17431	11695	13911	NM_177619	1000	371	448	75	2	+
NM_144813	up	ENSMUST00000123155	up	0.7142857	0.0141369	ENSMUST00000123155	17431	4070	4170	NM_144813	1000	900	1000	90	10	+
NM_144813	up	ENSMUST00000123155	up	0.7142857	0.0141369	ENSMUST00000123155	17431	14876	14931	NM_144813	1000	942	997	55	0	+
NM_001184706	up	ENSMUST00000123155	up	0.7857143	0.005505952	ENSMUST00000123155	17431	16179	16377	NM_001184706	1000	343	551	168	11	+
NM_001184706	up	ENSMUST00000123155	up	0.7857143	0.005505952	ENSMUST00000123155	17431	4070	4246	NM_001184706	1000	343	512	147	11	+
NM_001184706	up	ENSMUST00000123155	up	0.7857143	0.005505952	ENSMUST00000123155	17431	14889	14930	NM_001184706	1000	395	436	40	1	+
NM_172560	up	ENSMUST00000123155	up	0.7857143	0.005505952	ENSMUST00000123155	17431	10984	11053	NM_172560	1000	352	418	48	3	-
NM_178619	up	ENSMUST00000123155	up	0.7142857	0.0141369	ENSMUST00000123155	17431	11654	14010	NM_178619	1000	626	965	148	9	-
NM_178619	up	ENSMUST00000123155	up	0.7142857	0.0141369	ENSMUST00000123155	17431	11646	11759	NM_178619	1000	631	744	105	8	-
NM_030725	up	ENSMUST00000123155	up	0.8571429	0.001736111	ENSMUST00000123155	17431	11724	11923	NM_030725	1000	136	665	54	1	-
NM_024184	up	ENSMUST00000123155	up	0.6428571	0.03115079	ENSMUST00000123155	17431	11670	11759	NM_024184	1000	242	331	82	7	-
NM_016879	up	ENSMUST00000123155	up	0.7142857	0.0141369	ENSMUST00000123155	17431	14879	14972	NM_016879	1000	526	621	88	4	-
NM_001177659	up	ENSMUST00000123155	up	0.7857143	0.005505952	ENSMUST00000123155	17431	11658	13920	NM_001177659	1000	423	650	118	9	-
NM_001177659	up	ENSMUST00000123155	up	0.7857143	0.005505952	ENSMUST00000123155	17431	12394	13893	NM_001177659	1000	554	649	69	5	-
NM_009542	up	AK053260	up	1	4.96E-05	AK053260	3324	842	894	NM_009542	1000	554	606	51	1	+
NM_030725	up	ENSMUST00000129991	up	0.7857143	0.005505952	ENSMUST00000129991	16898	7664	7742	NM_030725	1000	107	165	57	1	+
NM_016879	up	ENSMUST00000129991	up	0.7857143	0.005505952	ENSMUST00000129991	16898	1226	1392	NM_016879	1000	491	658	141	8	+
NM_016879	up	ENSMUST00000129991	up	0.7857143	0.005505952	ENSMUST00000129991	16898	14356	14503	NM_016879	1000	512	658	126	6	+
NM_001038499	up	uc008akv.1	up	0.6428571	0.03115079	uc008akv.1	12539	11598	11647	NM_001038499	1000	811	854	43	0	-
NM_018883	up	uc007jxl.1	up	0.6428571	0.03115079	uc007jxl.1	5102	2154	2267	NM_018883	1000	213	325	105	7	+
NM_001198914	up	uc007jxl.1	up	0.6428571	0.03115079	uc007jxl.1	5102	2117	2274	NM_001198914	1000	328	484	143	8	+
NM_025401	up	uc007jxl.1	up	0.7857143	0.005505952	uc007jxl.1	5102	2118	2272	NM_025401	1000	400	552	140	12	-
NM_001198914	up	NR_030773	up	0.6428571	0.03115079	NR_030773	19385	13320	13467	NM_001198914	1000	331	484	136	9	+
NM_001198914	up	NR_030773	up	0.6428571	0.03115079	NR_030773	19385	7904	8057	NM_001198914	1000	328	487	142	7	-
NM_001198914	up	NR_030773	up	0.6428571	0.03115079	NR_030773	19385	5824	5977	NM_001198914	1000	328	483	140	11	-
NM_001198914	up	NR_030773	up	0.6428571	0.03115079	NR_030773	19385	17934	18031	NM_001198914	1000	336	433	90	7	-
NM_016879	up	NR_030773	up	0.7142857	0.0141369	NR_030773	19385	11115	11157	NM_016879	1000	575	618	41	1	+
NM_016879	up	NR_030773	up	0.7142857	0.0141369	NR_030773	19385	13158	13290	NM_016879	1000	514	658	116	3	-
NM_016879	up	NR_030773	up	0.7142857	0.0141369	NR_030773	19385	4620	4794	NM_016879	1000	495	656	131	7	-
NM_025401	up	NR_030773	up	0.7857143	0.005505952	NR_030773	19385	7917	8056	NM_025401	1000	412	552	130	7	+
NM_025401	up	NR_030773	up	0.7857143	0.005505952	NR_030773	19385	1864	1937	NM_025401	1000	473	542	66	2	-
NM_001184706	up	NR_030773	up	0.6428571	0.03115079	NR_030773	19385	4610	4796	NM_001184706	1000	341	525	156	8	+
NM_001177659	up	NR_030773	up	0.7857143	0.005505952	NR_030773	19385	7901	8037	NM_001177659	1000	498	650	121	6	+
NM_001177659	up	NR_030773	up	0.7857143	0.005505952	NR_030773	19385	17908	18018	NM_001177659	1000	429	649	104	6	+
NM_001177659	up	NR_030773	up	0.7857143	0.005505952	NR_030773	19385	5878	5953	NM_001177659	1000	572	647	71	4	+
NM_001177659	up	NR_030773	up	0.7857143	0.005505952	NR_030773	19385	11255	11330	NM_001177659	1000	554	623	63	2	+
NM_001177659	up	NR_030773	up	0.7857143	0.005505952	NR_030773	19385	13153	13445	NM_001177659	1000	542	904	123	9	-
NM_001177659	up	NR_030773	up	0.7857143	0.005505952	NR_030773	19385	1867	1955	NM_001177659	1000	543	659	76	3	-
NM_001168693	up	NR_030773	up	0.7857143	0.005505952	NR_030773	19385	7968	8035	NM_001168693	1000	737	807	57	3	+
NM_018883	up	NR_030773	up	0.6428571	0.03115079	NR_030773	19385	13145	13290	NM_018883	1000	375	535	134	10	-
NM_025401	up	ENSMUST00000126693	up	0.6428571	0.03115079	ENSMUST00000126693	5599	3220	3771	NM_025401	1000	412	530	108	9	+
NM_001177659	up	ENSMUST00000126693	up	0.6428571	0.03115079	ENSMUST00000126693	5599	3004	3350	NM_001177659	1000	498	659	145	6	+
NM_001177659	up	ENSMUST00000126693	up	0.6428571	0.03115079	ENSMUST00000126693	5599	3703	3771	NM_001177659	1000	581	647	45	2	+
NM_018883	up	ENSMUST00000126693	up	0.7857143	0.005505952	ENSMUST00000126693	5599	3000	3324	NM_018883	1000	213	355	126	6	-
NM_025401	up	AK090292	up	0.7857143	0.005505952	AK090292	14284	13028	13174	NM_025401	1000	406	552	136	8	+
NM_025401	up	AK090292	up	0.7857143	0.005505952	AK090292	14284	12749	12902	NM_025401	1000	392	542	135	7	-
NM_001177659	up	AK090292	up	0.6428571	0.03115079	AK090292	14284	13022	13155	NM_001177659	1000	516	650	118	7	+
NM_001177659	up	AK090292	up	0.6428571	0.03115079	AK090292	14284	12761	12881	NM_001177659	1000	431	650	114	4	-
NM_001198914	up	AK090292	up	0.6428571	0.03115079	AK090292	14284	12749	12916	NM_001198914	1000	336	483	139	7	+
NM_001198914	up	AK090292	up	0.6428571	0.03115079	AK090292	14284	13023	13176	NM_001198914	1000	327	484	145	8	-
NM_001184706	up	AK090292	up	0.6428571	0.03115079	AK090292	14284	10068	10253	NM_001184706	1000	343	524	160	8	+
NM_001184706	up	AK090292	up	0.6428571	0.03115079	AK090292	14284	7012	7194	NM_001184706	1000	329	509	160	8	-
NM_016879	up	AK090292	up	0.7142857	0.0141369	AK090292	14284	7034	7178	NM_016879	1000	514	656	99	8	+
NM_172560	up	AK090292	up	0.7857143	0.005505952	AK090292	14284	13067	13152	NM_172560	1000	352	434	75	6	-
NM_001168693	up	AK090292	up	0.6428571	0.03115079	AK090292	14284	12763	12830	NM_001168693	1000	737	807	49	1	-
NM_022986	up	AK155972	up	0.6428571	0.03115079	AK155972	98404	91147	91192	NM_022986	1000	143	188	42	3	+
NM_001101486	up	AK155972	up	0.6428571	0.03115079	AK155972	98404	63994	69679	NM_001101486	1000	217	499	254	21	-
NM_001101486	up	AK155972	up	0.6428571	0.03115079	AK155972	98404	72756	73029	NM_001101486	1000	217	491	241	22	-
NM_001101486	up	AK155972	up	0.6428571	0.03115079	AK155972	98404	47363	47578	NM_001101486	1000	217	432	199	16	-
NM_001101486	up	AK155972	up	0.6428571	0.03115079	AK155972	98404	69403	69454	NM_001101486	1000	443	494	48	3	-
NM_178413	up	uc008wjq.1	up	0.6428571	0.03115079	uc008wjq.1	44309	15693	15731	NM_178413	1000	9	49	36	2	+
NM_009773	up	uc008wjq.1	up	0.6428571	0.03115079	uc008wjq.1	44309	2642	2673	NM_009773	1000	206	237	31	0	-
NM_011496	up	uc008wjq.1	up	0.6428571	0.03115079	uc008wjq.1	44309	11079	11147	NM_011496	1000	527	595	60	2	-
NM_025401	up	uc009adp.1	up	0.7142857	0.0141369	uc009adp.1	5597	3220	3771	NM_025401	1000	412	530	108	9	+
NM_009020	up	uc009adp.1	up	0.8571429	0.001736111	uc009adp.1	5597	2125	2162	NM_009020	1000	266	303	34	3	+
NM_001177659	up	uc009adp.1	up	0.7142857	0.0141369	uc009adp.1	5597	3004	3350	NM_001177659	1000	498	659	145	6	+
NM_001177659	up	uc009adp.1	up	0.7142857	0.0141369	uc009adp.1	5597	3703	3771	NM_001177659	1000	581	647	45	2	+
NM_176830	up	uc009adp.1	up	0.6428571	0.03115079	uc009adp.1	5597	3255	3360	NM_176830	1000	894	1000	100	5	-
NM_030725	up	uc009adp.1	up	0.7857143	0.005505952	uc009adp.1	5597	2363	2409	NM_030725	1000	295	363	41	2	-
NM_009890	up	uc009adp.1	up	0.8571429	0.001736111	uc009adp.1	5597	2408	2460	NM_009890	1000	55	107	47	5	-
NM_009890	up	uc009adp.1	up	0.8571429	0.001736111	uc009adp.1	5597	2268	2320	NM_009890	1000	57	107	47	3	-
NM_001198914	up	uc009adp.1	up	0.7142857	0.0141369	uc009adp.1	5597	3209	3392	NM_001198914	1000	76	485	166	7	-
NM_001033266	up	uc009adp.1	up	1	4.96E-05	uc009adp.1	5597	2171	2235	NM_001033266	1000	201	261	57	3	-
NM_001033266	up	uc009adp.1	up	1	4.96E-05	uc009adp.1	5597	2116	2173	NM_001033266	1000	201	258	52	5	-
NM_001033266	up	uc009adp.1	up	1	4.96E-05	uc009adp.1	5597	2224	2277	NM_001033266	1000	201	262	49	3	-
NM_178619	up	uc008ymt.1	up	0.7857143	0.005505952	uc008ymt.1	5270	3376	3511	NM_178619	1000	609	747	127	7	+
NM_024184	up	uc008ymt.1	up	0.7142857	0.0141369	uc008ymt.1	5270	3377	3512	NM_024184	1000	222	360	127	8	+
NM_011496	up	uc008ymt.1	up	0.8571429	0.001736111	uc008ymt.1	5270	3390	3512	NM_011496	1000	797	922	114	8	+
NM_001177659	up	uc008ymt.1	up	0.7142857	0.0141369	uc008ymt.1	5270	3353	3496	NM_001177659	1000	398	650	129	4	+
NM_001113213	up	uc008ymt.1	up	0.7857143	0.005505952	uc008ymt.1	5270	3353	3496	NM_001113213	1000	398	650	129	4	+
NM_001033266	up	uc008ymt.1	up	0.7142857	0.0141369	uc008ymt.1	5270	1392	1424	NM_001033266	1000	230	262	32	0	+
NM_177619	up	uc008ymt.1	up	0.7142857	0.0141369	uc008ymt.1	5270	3362	3516	NM_177619	1000	314	464	136	8	-
NM_176830	up	uc008ymt.1	up	0.7857143	0.005505952	uc008ymt.1	5270	3410	3515	NM_176830	1000	894	1000	95	4	-
NM_175933	up	uc008ymt.1	up	0.7142857	0.0141369	uc008ymt.1	5270	3359	3512	NM_175933	1000	840	990	136	9	-
NM_144813	up	uc008ymt.1	up	0.7857143	0.005505952	uc008ymt.1	5270	3351	3479	NM_144813	1000	97	209	105	4	-
NM_025674	up	uc008ymt.1	up	0.7142857	0.0141369	uc008ymt.1	5270	3362	3489	NM_025674	1000	816	943	113	8	-
NM_001013390	up	uc007ozg.1	up	0.6428571	0.03115079	uc007ozg.1	15174	12555	12666	NM_001013390	1000	710	843	97	1	+
NM_001013390	up	uc007ozg.1	up	0.6428571	0.03115079	uc007ozg.1	15174	13456	13561	NM_001013390	1000	734	833	76	3	-
NM_001013390	up	uc007ozg.1	up	0.6428571	0.03115079	uc007ozg.1	15174	13526	13797	NM_001013390	1000	722	844	84	1	-
NM_001198914	up	uc007ozg.1	up	0.6428571	0.03115079	uc007ozg.1	15174	6304	6444	NM_001198914	1000	336	470	124	10	+
NM_001162539	up	uc007ozg.1	up	0.6428571	0.03115079	uc007ozg.1	15174	9429	9463	NM_001162539	1000	526	560	34	0	+
NM_001162539	up	uc007ozg.1	up	0.6428571	0.03115079	uc007ozg.1	15174	12615	12665	NM_001162539	1000	516	572	50	0	-
NM_001162539	up	uc007ozg.1	up	0.6428571	0.03115079	uc007ozg.1	15174	12556	12588	NM_001162539	1000	515	547	31	1	-
NM_001184706	up	uc007ozg.1	up	0.7857143	0.005505952	uc007ozg.1	15174	3091	3249	NM_001184706	1000	343	509	116	5	-
NM_178619	up	uc007ozg.1	up	0.7142857	0.0141369	uc007ozg.1	15174	6328	6445	NM_178619	1000	609	720	101	9	-
NM_009890	up	uc007ozg.1	up	0.6428571	0.03115079	uc007ozg.1	15174	12567	12620	NM_009890	1000	54	107	51	2	-
NM_177619	up	uc008ewr.1	up	0.6428571	0.03115079	uc008ewr.1	3204	1643	1738	NM_177619	1000	335	430	89	6	+
NM_175933	up	uc008ewr.1	up	0.6428571	0.03115079	uc008ewr.1	3204	1630	1750	NM_175933	1000	844	964	112	8	+
NM_025674	up	uc008ewr.1	up	0.6428571	0.03115079	uc008ewr.1	3204	1649	1750	NM_025674	1000	816	921	92	8	+
NM_001198914	up	uc008ewr.1	up	0.7857143	0.005505952	uc008ewr.1	3204	1633	1767	NM_001198914	1000	336	473	126	8	+
NM_178619	up	uc008ewr.1	up	0.7142857	0.0141369	uc008ewr.1	3204	1638	1763	NM_178619	1000	842	965	117	6	-
NM_026735	up	uc008ewr.1	up	0.7142857	0.0141369	uc008ewr.1	3204	1647	1740	NM_026735	1000	200	295	77	6	-
NM_025401	up	uc008ewr.1	up	0.7857143	0.005505952	uc008ewr.1	3204	1630	1740	NM_025401	1000	435	545	103	7	-
NM_011496	up	uc008ewr.1	up	0.6428571	0.03115079	uc008ewr.1	3204	1633	1750	NM_011496	1000	797	917	110	7	-
NM_001177659	up	uc008ewr.1	up	0.6428571	0.03115079	uc008ewr.1	3204	1643	1750	NM_001177659	1000	542	649	102	5	-
NM_001113213	up	uc008ewr.1	up	0.7142857	0.0141369	uc008ewr.1	3204	1643	1750	NM_001113213	1000	542	649	102	5	-
NM_177619	up	ENSMUST00000170898	up	0.6428571	0.03115079	ENSMUST00000170898	2297	1849	1982	NM_177619	1000	331	464	120	13	+
NM_178619	up	ENSMUST00000170898	up	0.7142857	0.0141369	ENSMUST00000170898	2297	1837	1985	NM_178619	1000	606	976	133	8	-
NM_001177659	up	ENSMUST00000170898	up	0.6428571	0.03115079	ENSMUST00000170898	2297	1852	1958	NM_001177659	1000	544	650	97	9	-
NM_144813	up	uc009ieo.1	up	0.6428571	0.03115079	uc009ieo.1	86911	76646	76760	NM_144813	1000	100	216	111	3	+
NM_144813	up	uc009ieo.1	up	0.6428571	0.03115079	uc009ieo.1	86911	46864	46984	NM_144813	1000	97	217	104	7	-
NM_144813	up	uc009ieo.1	up	0.6428571	0.03115079	uc009ieo.1	86911	54492	54562	NM_144813	1000	102	172	69	1	-
NM_178619	up	uc009ieo.1	up	0.6428571	0.03115079	uc009ieo.1	86911	46873	54584	NM_178619	1000	605	961	242	9	+
NM_178619	up	uc009ieo.1	up	0.6428571	0.03115079	uc009ieo.1	86911	81322	81469	NM_178619	1000	605	981	136	11	+
NM_178619	up	uc009ieo.1	up	0.6428571	0.03115079	uc009ieo.1	86911	54455	54575	NM_178619	1000	608	723	105	9	+
NM_178619	up	uc009ieo.1	up	0.6428571	0.03115079	uc009ieo.1	86911	12085	71985	NM_178619	1000	611	706	76	4	+
NM_178619	up	uc009ieo.1	up	0.6428571	0.03115079	uc009ieo.1	86911	76610	76734	NM_178619	1000	853	977	117	7	-
NM_001013390	up	ENSMUST00000138170	up	0.6428571	0.03115079	ENSMUST00000138170	9669	2894	2945	NM_001013390	1000	702	833	51	0	-
NM_001141976	up	ENSMUST00000140968	up	0.7857143	0.005505952	ENSMUST00000140968	12632	10978	11034	NM_001141976	1000	0	56	55	1	+
NM_199196	up	ENSMUST00000140968	up	0.7142857	0.0141369	ENSMUST00000140968	12632	8648	8745	NM_199196	1000	758	966	65	3	+
NM_199017	up	ENSMUST00000140968	up	0.8571429	0.001736111	ENSMUST00000140968	12632	6575	6686	NM_199017	1000	888	997	96	5	+
NM_028006	up	ENSMUST00000140968	up	0.7142857	0.0141369	ENSMUST00000140968	12632	6962	6995	NM_028006	1000	884	917	32	1	+
NM_025674	up	ENSMUST00000140968	up	0.7857143	0.005505952	ENSMUST00000140968	12632	6268	6762	NM_025674	1000	567	846	203	9	-
NM_010892	up	ENSMUST00000140968	up	0.7142857	0.0141369	ENSMUST00000140968	12632	6573	6744	NM_010892	1000	282	449	153	10	-
NM_001033274	up	ENSMUST00000140968	up	0.9285714	0.000396825	ENSMUST00000140968	12632	6675	6757	NM_001033274	1000	915	1000	81	1	-
NM_177619	up	ENSMUST00000140968	up	0.7857143	0.005505952	ENSMUST00000140968	12632	8907	8945	NM_177619	1000	385	423	37	1	-
NM_144813	up	ENSMUST00000140968	up	0.7142857	0.0141369	ENSMUST00000140968	12632	8895	8945	NM_144813	1000	131	183	45	0	-
NM_175933	up	ENSMUST00000144984	up	0.7857143	0.005505952	ENSMUST00000144984	1332	401	445	NM_175933	1000	940	986	41	2	+
NM_025674	up	ENSMUST00000144984	up	0.7857143	0.005505952	ENSMUST00000144984	1332	318	445	NM_025674	1000	812	943	58	2	+
NM_009743	up	ENSMUST00000144984	up	0.6428571	0.03115079	ENSMUST00000144984	1332	411	449	NM_009743	1000	747	785	35	3	+
NM_178619	up	uc007ype.1	up	0.7142857	0.0141369	uc007ype.1	7537	1409	1567	NM_178619	1000	816	981	147	6	+
NM_025401	up	uc007ype.1	up	0.6428571	0.03115079	uc007ype.1	7537	1419	1566	NM_025401	1000	406	552	135	11	+
NM_011496	up	uc007ype.1	up	0.7857143	0.005505952	uc007ype.1	7537	1438	1557	NM_011496	1000	797	916	111	6	+
NM_001113213	up	uc007ype.1	up	0.7142857	0.0141369	uc007ype.1	7537	1424	1545	NM_001113213	1000	430	649	111	5	+
NM_175933	up	uc007ype.1	up	0.6428571	0.03115079	uc007ype.1	7537	1407	1557	NM_175933	1000	845	994	137	10	-
NM_025674	up	uc007ype.1	up	0.6428571	0.03115079	uc007ype.1	7537	1413	1557	NM_025674	1000	798	948	133	11	-
NM_001198914	up	uc007ype.1	up	0.7857143	0.005505952	uc007ype.1	7537	1410	1567	NM_001198914	1000	328	487	145	6	-
NM_011496	up	uc008kue.1	up	0.7142857	0.0141369	uc008kue.1	9830	4912	4960	NM_011496	1000	797	845	45	3	+
NM_178619	up	uc008kue.1	up	0.6428571	0.03115079	uc008kue.1	9830	2072	2211	NM_178619	1000	605	977	128	7	+
NM_178619	up	uc008kue.1	up	0.6428571	0.03115079	uc008kue.1	9830	741	885	NM_178619	1000	837	973	107	3	+
NM_178619	up	uc008kue.1	up	0.6428571	0.03115079	uc008kue.1	9830	7919	7961	NM_178619	1000	86	128	42	0	+
NM_001198914	up	uc008kue.1	up	0.7142857	0.0141369	uc008kue.1	9830	1608	1663	NM_001198914	1000	425	481	52	2	+
NM_001198914	up	uc008kue.1	up	0.7142857	0.0141369	uc008kue.1	9830	2065	2211	NM_001198914	1000	332	483	133	10	-
NM_001198914	up	uc008kue.1	up	0.7142857	0.0141369	uc008kue.1	9830	742	846	NM_001198914	1000	369	474	93	5	-
NM_001198914	up	uc008kue.1	up	0.7142857	0.0141369	uc008kue.1	9830	4892	4960	NM_001198914	1000	408	477	63	5	-
NM_001113213	up	uc008kue.1	up	0.6428571	0.03115079	uc008kue.1	9830	4905	4960	NM_001113213	1000	537	590	50	3	+
NM_178619	up	AA606236	up	0.7142857	0.0141369	AA606236	462	362	462	NM_178619	1000	838	936	93	4	+
NM_025401	up	AA606236	up	0.7857143	0.005505952	AA606236	462	372	451	NM_025401	1000	418	497	73	6	+
NM_001177659	up	AA606236	up	0.6428571	0.03115079	AA606236	462	372	462	NM_001177659	1000	537	625	84	4	+
NM_001198914	up	AA606236	up	0.6428571	0.03115079	AA606236	462	361	462	NM_001198914	1000	373	475	96	5	-
NM_178619	up	AK051884	up	0.6428571	0.03115079	AK051884	1713	1366	1492	NM_178619	1000	820	947	111	3	+
NM_001177659	up	AK051884	up	0.8571429	0.001736111	AK051884	1713	1362	1487	NM_001177659	1000	501	631	109	6	+
NM_177619	up	AK051884	up	0.7142857	0.0141369	AK051884	1713	1371	1492	NM_177619	1000	348	463	98	6	-
NM_176830	up	AK051884	up	0.6428571	0.03115079	AK051884	1713	1420	1469	NM_176830	1000	951	1000	48	1	-
NM_175933	up	uc007aqp.1	up	0.6428571	0.03115079	uc007aqp.1	9048	7053	7167	NM_175933	1000	847	970	104	10	+
NM_175933	up	uc007aqp.1	up	0.6428571	0.03115079	uc007aqp.1	9048	1001	1148	NM_175933	1000	844	993	136	10	-
NM_018883	up	uc007aqp.1	up	0.7857143	0.005505952	uc007aqp.1	9048	7081	7180	NM_018883	1000	221	321	92	4	+
NM_018883	up	uc007aqp.1	up	0.7857143	0.005505952	uc007aqp.1	9048	1001	1116	NM_018883	1000	216	342	105	10	-
NM_018883	up	uc007aqp.1	up	0.7857143	0.005505952	uc007aqp.1	9048	3983	4033	NM_018883	1000	221	271	46	4	-
NM_025401	up	uc007aqp.1	up	0.6428571	0.03115079	uc007aqp.1	9048	1015	1148	NM_025401	1000	412	545	124	9	+
NM_011496	up	uc007aqp.1	up	0.6428571	0.03115079	uc007aqp.1	9048	1031	1148	NM_011496	1000	800	917	108	9	+
NM_011496	up	uc007aqp.1	up	0.6428571	0.03115079	uc007aqp.1	9048	3949	4037	NM_011496	1000	796	884	80	8	+
NM_001177659	up	uc007aqp.1	up	0.6428571	0.03115079	uc007aqp.1	9048	1007	1136	NM_001177659	1000	516	650	118	9	+
NM_001177659	up	uc007aqp.1	up	0.6428571	0.03115079	uc007aqp.1	9048	3939	4037	NM_001177659	1000	533	629	89	7	+
NM_001177659	up	uc007aqp.1	up	0.6428571	0.03115079	uc007aqp.1	9048	7062	7167	NM_001177659	1000	438	650	91	3	-
NM_001113213	up	uc007aqp.1	up	0.7142857	0.0141369	uc007aqp.1	9048	1007	1136	NM_001113213	1000	516	650	118	9	+
NM_001113213	up	uc007aqp.1	up	0.7142857	0.0141369	uc007aqp.1	9048	3939	4037	NM_001113213	1000	533	629	89	7	+
NM_001113213	up	uc007aqp.1	up	0.7142857	0.0141369	uc007aqp.1	9048	7062	7167	NM_001113213	1000	438	650	91	3	-
NM_133991	up	uc007aqp.1	up	0.7142857	0.0141369	uc007aqp.1	9048	5510	6117	NM_133991	1000	67	687	208	15	-
NM_001184706	up	uc007aqp.1	up	0.6428571	0.03115079	uc007aqp.1	9048	5927	6118	NM_001184706	1000	342	524	168	7	-
NM_001013749	up	ENSMUST00000126849	up	0.7142857	0.0141369	ENSMUST00000126849	14293	586	640	NM_001013749	1000	151	228	53	0	+
NM_009020	up	ENSMUST00000126849	up	0.7142857	0.0141369	ENSMUST00000126849	14293	468	518	NM_009020	1000	253	306	47	1	-
NM_009020	up	ENSMUST00000126849	up	0.7142857	0.0141369	ENSMUST00000126849	14293	564	615	NM_009020	1000	253	306	48	0	-
NM_016879	up	ENSMUST00000126849	up	0.6428571	0.03115079	ENSMUST00000126849	14293	2192	2286	NM_016879	1000	522	621	83	3	-
NM_177619	up	AK141038	up	0.7857143	0.005505952	AK141038	2027	94	185	NM_177619	1000	335	426	84	7	+
NM_144813	up	AK141038	up	0.7142857	0.0141369	AK141038	2027	110	231	NM_144813	1000	97	217	112	8	+
NM_199196	up	AK141038	up	0.7142857	0.0141369	AK141038	2027	144	227	NM_199196	1000	880	964	79	3	-
NM_178619	up	AK141038	up	0.7142857	0.0141369	AK141038	2027	73	244	NM_178619	1000	819	981	140	13	-
NM_178619	up	AK141038	up	0.7142857	0.0141369	AK141038	2027	102	215	NM_178619	1000	609	723	104	8	-
NM_001113213	up	AK141038	up	0.7142857	0.0141369	AK141038	2027	94	225	NM_001113213	1000	416	649	119	7	-
NM_199017	up	BM461233	up	0.6428571	0.03115079	BM461233	1019	608	669	NM_199017	1000	920	981	59	2	-
NM_144813	up	BM461233	up	0.6428571	0.03115079	BM461233	1019	602	696	NM_144813	1000	906	1000	87	7	-
NM_001141975	up	AK137947	up	0.7142857	0.0141369	AK137947	2183	1042	1125	NM_001141975	1000	83	166	74	4	-
NM_176830	up	uc008xof.1	up	0.6428571	0.03115079	uc008xof.1	9377	7723	7828	NM_176830	1000	894	1000	96	9	+
NM_176830	up	uc008xof.1	up	0.6428571	0.03115079	uc008xof.1	9377	6566	6651	NM_176830	1000	915	1000	81	4	+
NM_176830	up	uc008xof.1	up	0.6428571	0.03115079	uc008xof.1	9377	4725	4828	NM_176830	1000	897	1000	94	9	-
NM_175933	up	uc008xof.1	up	0.7142857	0.0141369	uc008xof.1	9377	6549	6686	NM_175933	1000	840	978	127	9	+
NM_144813	up	uc008xof.1	up	0.6428571	0.03115079	uc008xof.1	9377	7761	7882	NM_144813	1000	99	216	111	5	+
NM_144813	up	uc008xof.1	up	0.6428571	0.03115079	uc008xof.1	9377	4667	4794	NM_144813	1000	97	217	110	10	-
NM_011496	up	uc008xof.1	up	0.7142857	0.0141369	uc008xof.1	9377	4703	4831	NM_011496	1000	797	925	117	11	+
NM_011496	up	uc008xof.1	up	0.7142857	0.0141369	uc008xof.1	9377	7726	7850	NM_011496	1000	797	922	112	12	-
NM_001198914	up	uc008xof.1	up	0.7142857	0.0141369	uc008xof.1	9377	7722	7875	NM_001198914	1000	328	481	142	11	+
NM_001198914	up	uc008xof.1	up	0.7142857	0.0141369	uc008xof.1	9377	6545	6696	NM_001198914	1000	328	481	138	13	+
NM_001198914	up	uc008xof.1	up	0.7142857	0.0141369	uc008xof.1	9377	4668	4828	NM_001198914	1000	332	484	142	9	-
NM_001113213	up	uc008xof.1	up	0.7857143	0.005505952	uc008xof.1	9377	4675	4820	NM_001113213	1000	500	659	135	7	+
NM_001113213	up	uc008xof.1	up	0.7857143	0.005505952	uc008xof.1	9377	7742	7838	NM_001113213	1000	554	650	87	9	-
NM_178619	up	uc008xof.1	up	0.7857143	0.005505952	uc008xof.1	9377	4664	4828	NM_178619	1000	820	977	146	7	+
NM_178619	up	uc008xof.1	up	0.7857143	0.005505952	uc008xof.1	9377	4685	4802	NM_178619	1000	605	723	107	9	+
NM_178619	up	uc008xof.1	up	0.7857143	0.005505952	uc008xof.1	9377	3745	3799	NM_178619	1000	916	970	50	4	+
NM_178619	up	uc008xof.1	up	0.7857143	0.005505952	uc008xof.1	9377	7722	7882	NM_178619	1000	820	981	148	8	-
NM_178619	up	uc008xof.1	up	0.7857143	0.005505952	uc008xof.1	9377	6574	6686	NM_178619	1000	611	723	108	4	-
NM_028006	up	uc008xof.1	up	0.6428571	0.03115079	uc008xof.1	9377	4894	4925	NM_028006	1000	898	929	31	0	-
NM_025401	up	uc008xof.1	up	0.7142857	0.0141369	uc008xof.1	9377	7723	7888	NM_025401	1000	406	552	137	9	-
NM_025401	up	uc008xof.1	up	0.7142857	0.0141369	uc008xof.1	9377	6566	6693	NM_025401	1000	405	532	118	9	-
NM_001013749	up	uc007kwe.1	up	0.7857143	0.005505952	uc007kwe.1	2130	663	1189	NM_001013749	1000	164	228	55	1	+
NM_144813	up	uc007kwe.1	up	0.7142857	0.0141369	uc007kwe.1	2130	1045	1093	NM_144813	1000	131	189	45	2	-
NM_025401	up	uc008qwo.1	up	0.9285714	0.000396825	uc008qwo.1	157422	135378	135486	NM_025401	1000	412	532	100	8	+
NM_025401	up	uc008qwo.1	up	0.9285714	0.000396825	uc008qwo.1	157422	88178	88308	NM_025401	1000	420	549	122	7	-
NM_001198914	up	uc008qwo.1	up	0.7857143	0.005505952	uc008qwo.1	157422	88186	88330	NM_001198914	1000	336	481	137	5	+
NM_001198914	up	uc008qwo.1	up	0.7857143	0.005505952	uc008qwo.1	157422	135366	135495	NM_001198914	1000	340	488	120	9	-
NM_001177810	up	uc008qwo.1	up	0.6428571	0.03115079	uc008qwo.1	157422	128314	128371	NM_001177810	1000	15	71	55	1	+
NM_001177810	up	uc008qwo.1	up	0.6428571	0.03115079	uc008qwo.1	157422	77640	77681	NM_001177810	1000	28	69	41	0	-
NM_026735	up	uc008qwo.1	up	0.7142857	0.0141369	uc008qwo.1	157422	145694	145812	NM_026735	1000	176	305	51	2	+
NM_001033266	up	uc008qwo.1	up	0.6428571	0.03115079	uc008qwo.1	157422	125511	125549	NM_001033266	1000	227	265	38	0	+
NM_001033266	up	uc008qwo.1	up	0.6428571	0.03115079	uc008qwo.1	157422	154153	154214	NM_001033266	1000	201	262	58	3	-
NM_009542	up	uc008qwo.1	up	1	4.96E-05	uc008qwo.1	157422	114471	114518	NM_009542	1000	554	600	45	0	+
NM_009542	up	uc008qwo.1	up	1	4.96E-05	uc008qwo.1	157422	154201	154253	NM_009542	1000	554	612	51	1	-
NM_009542	up	uc008qwo.1	up	1	4.96E-05	uc008qwo.1	157422	154154	154219	NM_009542	1000	376	585	45	0	-
NM_009020	up	uc008qwo.1	up	0.6428571	0.03115079	uc008qwo.1	157422	154214	154433	NM_009020	1000	266	330	51	1	+
NM_009020	up	uc008qwo.1	up	0.6428571	0.03115079	uc008qwo.1	157422	87136	87175	NM_009020	1000	272	311	38	1	-
NM_001184706	up	uc008qwo.1	up	0.6428571	0.03115079	uc008qwo.1	157422	103411	103454	NM_001184706	1000	395	436	40	1	-
NM_026280	up	uc008qwo.1	up	0.6428571	0.03115079	uc008qwo.1	157422	45295	45326	NM_026280	1000	76	107	31	0	-
NM_009890	up	uc008qwo.1	up	0.7857143	0.005505952	uc008qwo.1	157422	4600	4650	NM_009890	1000	57	107	50	0	-
NM_001038499	up	uc008qwo.1	up	0.7857143	0.005505952	uc008qwo.1	157422	154154	154210	NM_001038499	1000	808	868	55	1	-
NM_001038499	up	uc008qwo.1	up	0.7857143	0.005505952	uc008qwo.1	157422	120155	120188	NM_001038499	1000	823	856	33	0	-
NM_028006	up	uc007rul.1	up	0.7142857	0.0141369	uc007rul.1	41701	37242	37275	NM_028006	1000	896	929	33	0	+
NM_001184706	up	uc007rul.1	up	0.7857143	0.005505952	uc007rul.1	41701	35523	35706	NM_001184706	1000	343	524	157	7	+
NM_178619	up	uc007rul.1	up	0.7142857	0.0141369	uc007rul.1	41701	15520	17603	NM_178619	1000	605	981	203	13	+
NM_178619	up	uc007rul.1	up	0.7142857	0.0141369	uc007rul.1	41701	10337	10498	NM_178619	1000	827	981	148	5	+
NM_178619	up	uc007rul.1	up	0.7142857	0.0141369	uc007rul.1	41701	15507	15613	NM_178619	1000	816	925	84	4	+
NM_178619	up	uc007rul.1	up	0.7142857	0.0141369	uc007rul.1	41701	33433	33478	NM_178619	1000	102	145	43	0	+
NM_178619	up	uc007rul.1	up	0.7142857	0.0141369	uc007rul.1	41701	33337	33380	NM_178619	1000	102	145	40	3	+
NM_178619	up	uc007rul.1	up	0.7142857	0.0141369	uc007rul.1	41701	33375	33418	NM_178619	1000	102	145	39	4	+
NM_178619	up	uc007rul.1	up	0.7142857	0.0141369	uc007rul.1	41701	33170	33234	NM_178619	1000	102	145	42	0	+
NM_144813	up	uc007rul.1	up	0.7142857	0.0141369	uc007rul.1	41701	28136	28234	NM_144813	1000	902	1000	89	9	+
NM_144813	up	uc007rul.1	up	0.7142857	0.0141369	uc007rul.1	41701	12261	12358	NM_144813	1000	903	1000	88	9	+
NM_144813	up	uc007rul.1	up	0.7142857	0.0141369	uc007rul.1	41701	10349	10458	NM_144813	1000	99	208	104	5	-
NM_030725	up	uc007rul.1	up	0.7142857	0.0141369	uc007rul.1	41701	11837	11891	NM_030725	1000	108	162	54	0	+
NM_030725	up	uc007rul.1	up	0.7142857	0.0141369	uc007rul.1	41701	33320	33378	NM_030725	1000	107	165	55	3	-
NM_030725	up	uc007rul.1	up	0.7142857	0.0141369	uc007rul.1	41701	33131	33209	NM_030725	1000	107	163	54	2	-
NM_025674	up	uc007rul.1	up	0.6428571	0.03115079	uc007rul.1	41701	12069	12423	NM_025674	1000	420	524	73	0	+
NM_024184	up	uc007rul.1	up	0.6428571	0.03115079	uc007rul.1	41701	17462	17595	NM_024184	1000	222	355	126	7	+
NM_024184	up	uc007rul.1	up	0.6428571	0.03115079	uc007rul.1	41701	10355	10494	NM_024184	1000	221	360	128	11	+
NM_024184	up	uc007rul.1	up	0.6428571	0.03115079	uc007rul.1	41701	15529	15612	NM_024184	1000	223	306	77	6	+
NM_001177659	up	uc007rul.1	up	0.7857143	0.005505952	uc007rul.1	41701	10345	10476	NM_001177659	1000	500	649	121	7	+
NM_001177659	up	uc007rul.1	up	0.7857143	0.005505952	uc007rul.1	41701	17459	17582	NM_001177659	1000	516	649	111	5	+
NM_001113213	up	uc007rul.1	up	0.7142857	0.0141369	uc007rul.1	41701	10345	10476	NM_001113213	1000	500	649	121	7	+
NM_001113213	up	uc007rul.1	up	0.7142857	0.0141369	uc007rul.1	41701	17459	17582	NM_001113213	1000	516	649	111	5	+
NM_133991	up	uc007rul.1	up	0.7142857	0.0141369	uc007rul.1	41701	35521	35704	NM_133991	1000	65	252	169	14	+
NM_133991	up	uc007rul.1	up	0.7142857	0.0141369	uc007rul.1	41701	10362	10421	NM_133991	1000	671	730	54	5	-
NM_177619	up	uc007rul.1	up	0.7857143	0.005505952	uc007rul.1	41701	10349	10476	NM_177619	1000	335	462	118	9	-
NM_177619	up	uc007rul.1	up	0.7857143	0.005505952	uc007rul.1	41701	17456	17582	NM_177619	1000	335	463	116	10	-
NM_175933	up	uc007rul.1	up	0.6428571	0.03115079	uc007rul.1	41701	17456	17598	NM_175933	1000	841	984	132	9	-
NM_001033274	up	uc007rul.1	up	0.6428571	0.03115079	uc007rul.1	41701	35624	35703	NM_001033274	1000	915	1000	73	5	-
NM_001033274	up	ENSMUST00000147445	up	0.7857143	0.005505952	ENSMUST00000147445	16618	14803	14903	NM_001033274	1000	873	997	97	3	+
NM_001033274	up	ENSMUST00000147445	up	0.7857143	0.005505952	ENSMUST00000147445	16618	7486	7559	NM_001033274	1000	915	993	70	2	-
NM_175933	up	ENSMUST00000147445	up	0.7857143	0.005505952	ENSMUST00000147445	16618	13917	14088	NM_175933	1000	832	993	146	11	+
NM_175933	up	ENSMUST00000147445	up	0.7857143	0.005505952	ENSMUST00000147445	16618	11052	11197	NM_175933	1000	844	990	134	10	+
NM_175933	up	ENSMUST00000147445	up	0.7857143	0.005505952	ENSMUST00000147445	16618	9530	9671	NM_175933	1000	877	970	86	7	+
NM_175933	up	ENSMUST00000147445	up	0.7857143	0.005505952	ENSMUST00000147445	16618	6601	6662	NM_175933	1000	926	995	54	1	+
NM_175933	up	ENSMUST00000147445	up	0.7857143	0.005505952	ENSMUST00000147445	16618	13524	13675	NM_175933	1000	840	995	139	12	-
NM_175933	up	ENSMUST00000147445	up	0.7857143	0.005505952	ENSMUST00000147445	16618	15559	15708	NM_175933	1000	835	986	138	10	-
NM_175933	up	ENSMUST00000147445	up	0.7857143	0.005505952	ENSMUST00000147445	16618	14657	14777	NM_175933	1000	857	979	112	7	-
NM_175933	up	ENSMUST00000147445	up	0.7857143	0.005505952	ENSMUST00000147445	16618	3897	4006	NM_175933	1000	861	970	99	10	-
NM_009743	up	ENSMUST00000147445	up	0.6428571	0.03115079	ENSMUST00000147445	16618	13949	14059	NM_009743	1000	660	772	72	4	+
NM_009743	up	ENSMUST00000147445	up	0.6428571	0.03115079	ENSMUST00000147445	16618	15328	15384	NM_009743	1000	715	771	51	5	+
NM_009743	up	ENSMUST00000147445	up	0.6428571	0.03115079	ENSMUST00000147445	16618	13547	13657	NM_009743	1000	652	765	72	4	-
NM_001184706	up	ENSMUST00000147445	up	0.7857143	0.005505952	ENSMUST00000147445	16618	7378	7562	NM_001184706	1000	343	524	152	8	+
NM_001184706	up	ENSMUST00000147445	up	0.7857143	0.005505952	ENSMUST00000147445	16618	14821	15007	NM_001184706	1000	343	523	160	9	-
NM_199196	up	ENSMUST00000147445	up	0.8571429	0.001736111	ENSMUST00000147445	16618	4294	13610	NM_199196	1000	665	966	117	4	+
NM_199196	up	ENSMUST00000147445	up	0.8571429	0.001736111	ENSMUST00000147445	16618	14646	14728	NM_199196	1000	881	965	77	4	+
NM_199196	up	ENSMUST00000147445	up	0.8571429	0.001736111	ENSMUST00000147445	16618	3897	3941	NM_199196	1000	901	945	42	2	+
NM_199196	up	ENSMUST00000147445	up	0.8571429	0.001736111	ENSMUST00000147445	16618	9026	14067	NM_199196	1000	885	1000	101	2	-
NM_199196	up	ENSMUST00000147445	up	0.8571429	0.001736111	ENSMUST00000147445	16618	6303	6385	NM_199196	1000	880	964	78	4	-
NM_199196	up	ENSMUST00000147445	up	0.8571429	0.001736111	ENSMUST00000147445	16618	11076	15380	NM_199196	1000	901	1000	84	2	-
NM_199196	up	ENSMUST00000147445	up	0.8571429	0.001736111	ENSMUST00000147445	16618	3026	3106	NM_199196	1000	883	965	75	5	-
NM_199196	up	ENSMUST00000147445	up	0.8571429	0.001736111	ENSMUST00000147445	16618	9606	9671	NM_199196	1000	901	966	61	4	-
NM_199196	up	ENSMUST00000147445	up	0.8571429	0.001736111	ENSMUST00000147445	16618	9074	9135	NM_199196	1000	889	955	58	3	-
NM_178619	up	ENSMUST00000147445	up	0.8571429	0.001736111	ENSMUST00000147445	16618	11912	13678	NM_178619	1000	605	980	258	17	+
NM_178619	up	ENSMUST00000147445	up	0.8571429	0.001736111	ENSMUST00000147445	16618	15561	15699	NM_178619	1000	605	743	127	11	+
NM_178619	up	ENSMUST00000147445	up	0.8571429	0.001736111	ENSMUST00000147445	16618	3724	8675	NM_178619	1000	698	980	150	7	+
NM_178619	up	ENSMUST00000147445	up	0.8571429	0.001736111	ENSMUST00000147445	16618	8556	8606	NM_178619	1000	861	911	48	2	+
NM_178619	up	ENSMUST00000147445	up	0.8571429	0.001736111	ENSMUST00000147445	16618	12189	12236	NM_178619	1000	696	744	45	2	+
NM_178619	up	ENSMUST00000147445	up	0.8571429	0.001736111	ENSMUST00000147445	16618	5150	10596	NM_178619	1000	117	973	303	14	-
NM_178619	up	ENSMUST00000147445	up	0.8571429	0.001736111	ENSMUST00000147445	16618	9002	11189	NM_178619	1000	607	973	228	19	-
NM_178619	up	ENSMUST00000147445	up	0.8571429	0.001736111	ENSMUST00000147445	16618	13924	15380	NM_178619	1000	618	977	202	10	-
NM_178619	up	ENSMUST00000147445	up	0.8571429	0.001736111	ENSMUST00000147445	16618	2987	4504	NM_178619	1000	86	721	152	12	-
NM_178619	up	ENSMUST00000147445	up	0.8571429	0.001736111	ENSMUST00000147445	16618	9481	10901	NM_178619	1000	663	983	144	9	-
NM_178619	up	ENSMUST00000147445	up	0.8571429	0.001736111	ENSMUST00000147445	16618	5150	5276	NM_178619	1000	618	744	114	12	-
NM_178619	up	ENSMUST00000147445	up	0.8571429	0.001736111	ENSMUST00000147445	16618	11064	11160	NM_178619	1000	865	961	93	3	-
NM_178619	up	ENSMUST00000147445	up	0.8571429	0.001736111	ENSMUST00000147445	16618	6532	6627	NM_178619	1000	865	960	89	6	-
NM_178619	up	ENSMUST00000147445	up	0.8571429	0.001736111	ENSMUST00000147445	16618	6038	6080	NM_178619	1000	866	910	40	2	-
NM_177619	up	ENSMUST00000147445	up	0.7857143	0.005505952	ENSMUST00000147445	16618	2957	3108	NM_177619	1000	315	466	137	14	+
NM_177619	up	ENSMUST00000147445	up	0.7857143	0.005505952	ENSMUST00000147445	16618	11064	11189	NM_177619	1000	334	461	120	5	+
NM_177619	up	ENSMUST00000147445	up	0.7857143	0.005505952	ENSMUST00000147445	16618	13937	14067	NM_177619	1000	331	461	119	11	+
NM_177619	up	ENSMUST00000147445	up	0.7857143	0.005505952	ENSMUST00000147445	16618	6038	6075	NM_177619	1000	385	424	35	2	+
NM_177619	up	ENSMUST00000147445	up	0.7857143	0.005505952	ENSMUST00000147445	16618	15559	15704	NM_177619	1000	318	463	135	10	-
NM_177619	up	ENSMUST00000147445	up	0.7857143	0.005505952	ENSMUST00000147445	16618	3896	8675	NM_177619	1000	315	449	123	11	-
NM_177619	up	ENSMUST00000147445	up	0.7857143	0.005505952	ENSMUST00000147445	16618	12119	12232	NM_177619	1000	323	440	104	9	-
NM_177619	up	ENSMUST00000147445	up	0.7857143	0.005505952	ENSMUST00000147445	16618	8560	8618	NM_177619	1000	372	430	53	5	-
NM_144813	up	ENSMUST00000147445	up	0.8571429	0.001736111	ENSMUST00000147445	16618	11081	11197	NM_144813	1000	97	217	112	3	+
NM_144813	up	ENSMUST00000147445	up	0.8571429	0.001736111	ENSMUST00000147445	16618	13957	14088	NM_144813	1000	97	219	113	5	+
NM_144813	up	ENSMUST00000147445	up	0.8571429	0.001736111	ENSMUST00000147445	16618	6273	6366	NM_144813	1000	101	194	89	4	+
NM_144813	up	ENSMUST00000147445	up	0.8571429	0.001736111	ENSMUST00000147445	16618	5179	5306	NM_144813	1000	97	217	110	8	+
NM_144813	up	ENSMUST00000147445	up	0.8571429	0.001736111	ENSMUST00000147445	16618	6551	6669	NM_144813	1000	100	220	108	7	+
NM_144813	up	ENSMUST00000147445	up	0.8571429	0.001736111	ENSMUST00000147445	16618	14906	15668	NM_144813	1000	100	1000	195	13	-
NM_144813	up	ENSMUST00000147445	up	0.8571429	0.001736111	ENSMUST00000147445	16618	4808	14759	NM_144813	1000	99	994	187	14	-
NM_144813	up	ENSMUST00000147445	up	0.8571429	0.001736111	ENSMUST00000147445	16618	13547	13642	NM_144813	1000	97	192	90	5	-
NM_144813	up	ENSMUST00000147445	up	0.8571429	0.001736111	ENSMUST00000147445	16618	3814	3992	NM_144813	1000	99	207	103	4	-
NM_144813	up	ENSMUST00000147445	up	0.8571429	0.001736111	ENSMUST00000147445	16618	12119	12208	NM_144813	1000	97	186	83	6	-
NM_144813	up	ENSMUST00000147445	up	0.8571429	0.001736111	ENSMUST00000147445	16618	8560	8639	NM_144813	1000	97	176	73	6	-
NM_133435	up	ENSMUST00000147445	up	0.7142857	0.0141369	ENSMUST00000147445	16618	14816	15007	NM_133435	1000	317	508	180	10	+
NM_133435	up	ENSMUST00000147445	up	0.7142857	0.0141369	ENSMUST00000147445	16618	4384	4516	NM_133435	1000	481	731	56	0	+
NM_133435	up	ENSMUST00000147445	up	0.7142857	0.0141369	ENSMUST00000147445	16618	7375	7565	NM_133435	1000	317	511	181	9	-
NM_024184	up	ENSMUST00000147445	up	0.6428571	0.03115079	ENSMUST00000147445	16618	14605	14819	NM_024184	1000	210	396	162	8	+
NM_024184	up	ENSMUST00000147445	up	0.6428571	0.03115079	ENSMUST00000147445	16618	15567	15783	NM_024184	1000	222	457	147	7	+
NM_024184	up	ENSMUST00000147445	up	0.6428571	0.03115079	ENSMUST00000147445	16618	13538	13675	NM_024184	1000	222	360	123	6	+
NM_024184	up	ENSMUST00000147445	up	0.6428571	0.03115079	ENSMUST00000147445	16618	3920	4006	NM_024184	1000	252	338	80	6	+
NM_024184	up	ENSMUST00000147445	up	0.6428571	0.03115079	ENSMUST00000147445	16618	12163	12236	NM_024184	1000	281	355	67	6	+
NM_024184	up	ENSMUST00000147445	up	0.6428571	0.03115079	ENSMUST00000147445	16618	6273	14082	NM_024184	1000	207	610	196	7	-
NM_024184	up	ENSMUST00000147445	up	0.6428571	0.03115079	ENSMUST00000147445	16618	11064	11184	NM_024184	1000	223	343	115	5	-
NM_024184	up	ENSMUST00000147445	up	0.6428571	0.03115079	ENSMUST00000147445	16618	9492	9672	NM_024184	1000	228	354	118	8	-
NM_024184	up	ENSMUST00000147445	up	0.6428571	0.03115079	ENSMUST00000147445	16618	6273	6366	NM_024184	1000	229	322	87	6	-
NM_011496	up	ENSMUST00000147445	up	0.6428571	0.03115079	ENSMUST00000147445	16618	15580	15707	NM_011496	1000	797	925	119	8	+
NM_011496	up	ENSMUST00000147445	up	0.6428571	0.03115079	ENSMUST00000147445	16618	13551	13675	NM_011496	1000	797	922	116	8	+
NM_011496	up	ENSMUST00000147445	up	0.6428571	0.03115079	ENSMUST00000147445	16618	11932	12059	NM_011496	1000	797	925	117	9	+
NM_011496	up	ENSMUST00000147445	up	0.6428571	0.03115079	ENSMUST00000147445	16618	6488	8677	NM_011496	1000	604	927	130	8	+
NM_011496	up	ENSMUST00000147445	up	0.6428571	0.03115079	ENSMUST00000147445	16618	14670	14794	NM_011496	1000	797	922	113	9	+
NM_011496	up	ENSMUST00000147445	up	0.6428571	0.03115079	ENSMUST00000147445	16618	12119	12236	NM_011496	1000	799	917	107	10	+
NM_011496	up	ENSMUST00000147445	up	0.6428571	0.03115079	ENSMUST00000147445	16618	3903	4006	NM_011496	1000	797	900	95	8	+
NM_011496	up	ENSMUST00000147445	up	0.6428571	0.03115079	ENSMUST00000147445	16618	10137	10170	NM_011496	1000	828	861	32	1	+
NM_011496	up	ENSMUST00000147445	up	0.6428571	0.03115079	ENSMUST00000147445	16618	13921	14048	NM_011496	1000	797	925	118	9	-
NM_011496	up	ENSMUST00000147445	up	0.6428571	0.03115079	ENSMUST00000147445	16618	11052	11172	NM_011496	1000	797	917	112	8	-
NM_011496	up	ENSMUST00000147445	up	0.6428571	0.03115079	ENSMUST00000147445	16618	6514	6639	NM_011496	1000	797	922	113	12	-
NM_011496	up	ENSMUST00000147445	up	0.6428571	0.03115079	ENSMUST00000147445	16618	5150	5270	NM_011496	1000	797	917	108	12	-
NM_001113213	up	ENSMUST00000147445	up	0.8571429	0.001736111	ENSMUST00000147445	16618	11919	13659	NM_001113213	1000	431	650	145	4	+
NM_001113213	up	ENSMUST00000147445	up	0.8571429	0.001736111	ENSMUST00000147445	16618	8513	8665	NM_001113213	1000	491	659	128	8	+
NM_001113213	up	ENSMUST00000147445	up	0.8571429	0.001736111	ENSMUST00000147445	16618	15567	15688	NM_001113213	1000	431	650	113	7	+
NM_001113213	up	ENSMUST00000147445	up	0.8571429	0.001736111	ENSMUST00000147445	16618	3897	4006	NM_001113213	1000	438	645	103	6	+
NM_001113213	up	ENSMUST00000147445	up	0.8571429	0.001736111	ENSMUST00000147445	16618	11945	12049	NM_001113213	1000	555	659	95	9	+
NM_001113213	up	ENSMUST00000147445	up	0.8571429	0.001736111	ENSMUST00000147445	16618	10137	10210	NM_001113213	1000	573	649	45	1	+
NM_001113213	up	ENSMUST00000147445	up	0.8571429	0.001736111	ENSMUST00000147445	16618	13940	14070	NM_001113213	1000	501	650	123	5	-
NM_001113213	up	ENSMUST00000147445	up	0.8571429	0.001736111	ENSMUST00000147445	16618	11064	11184	NM_001113213	1000	432	650	114	5	-
NM_001113213	up	ENSMUST00000147445	up	0.8571429	0.001736111	ENSMUST00000147445	16618	5162	5282	NM_001113213	1000	432	650	113	6	-
NM_001113213	up	ENSMUST00000147445	up	0.8571429	0.001736111	ENSMUST00000147445	16618	9014	9671	NM_001113213	1000	438	650	120	11	-
NM_001113213	up	ENSMUST00000147445	up	0.8571429	0.001736111	ENSMUST00000147445	16618	6273	6381	NM_001113213	1000	416	629	101	6	-
NM_022986	up	ENSMUST00000147445	up	0.6428571	0.03115079	ENSMUST00000147445	16618	9890	9922	NM_022986	1000	136	168	32	0	-
NM_001162539	up	ENSMUST00000147445	up	0.9285714	0.000396825	ENSMUST00000147445	16618	11298	11344	NM_001162539	1000	516	562	45	1	-
NM_025674	up	ENSMUST00000147445	up	0.6428571	0.03115079	ENSMUST00000147445	16618	15559	15708	NM_025674	1000	789	942	138	11	-
NM_025674	up	ENSMUST00000147445	up	0.6428571	0.03115079	ENSMUST00000147445	16618	14648	14771	NM_025674	1000	816	943	115	8	-
NM_009020	up	uc007bdt.1	up	0.6428571	0.03115079	uc007bdt.1	25779	12964	13004	NM_009020	1000	263	303	39	1	+
NM_009020	up	uc007bdt.1	up	0.6428571	0.03115079	uc007bdt.1	25779	8684	8726	NM_009020	1000	264	306	41	1	-
NM_030725	up	uc007bdt.1	up	0.7142857	0.0141369	uc007bdt.1	25779	8203	8257	NM_030725	1000	107	161	54	0	+
NM_001162539	up	uc007bdt.1	up	0.6428571	0.03115079	uc007bdt.1	25779	6639	6679	NM_001162539	1000	514	554	40	0	+
NM_001162539	up	uc007bdt.1	up	0.6428571	0.03115079	uc007bdt.1	25779	12966	13004	NM_001162539	1000	522	560	38	0	-
NM_001184706	up	uc007bdt.1	up	0.6428571	0.03115079	uc007bdt.1	25779	12369	12539	NM_001184706	1000	343	514	147	13	-
NM_178619	up	uc007bdt.1	up	0.7142857	0.0141369	uc007bdt.1	25779	11647	11798	NM_178619	1000	823	973	128	11	-
NM_009542	up	uc007bdt.1	up	0.8571429	0.001736111	uc007bdt.1	25779	12876	13006	NM_009542	1000	560	673	51	0	-
NM_177619	up	humanlincRNA0479+	up	0.6428571	0.03115079	humanlincRNA0479+	15294	10954	11101	NM_177619	1000	314	464	134	12	+
NM_001198914	up	humanlincRNA0479+	up	0.7857143	0.005505952	humanlincRNA0479+	15294	10954	11107	NM_001198914	1000	328	483	137	7	+
NM_001184706	up	humanlincRNA0479+	up	0.6428571	0.03115079	humanlincRNA0479+	15294	5229	5341	NM_001184706	1000	404	514	97	6	+
NM_001184706	up	humanlincRNA0479+	up	0.6428571	0.03115079	humanlincRNA0479+	15294	8617	8673	NM_001184706	1000	395	451	53	3	-
NM_030725	up	humanlincRNA0479+	up	0.7142857	0.0141369	humanlincRNA0479+	15294	6309	6362	NM_030725	1000	99	152	53	0	-
NM_178619	up	humanlincRNA0479+	up	0.7142857	0.0141369	humanlincRNA0479+	15294	10954	11107	NM_178619	1000	825	981	146	6	-
NM_025401	up	humanlincRNA0479+	up	0.7857143	0.005505952	humanlincRNA0479+	15294	10940	11082	NM_025401	1000	426	572	130	8	-
NM_001141975	up	uc009rbt.1	up	0.7857143	0.005505952	uc009rbt.1	17346	14782	14834	NM_001141975	1000	0	57	49	3	+
NM_144813	up	uc009rbt.1	up	0.6428571	0.03115079	uc009rbt.1	17346	10805	13041	NM_144813	1000	97	1000	200	13	+
NM_144813	up	uc009rbt.1	up	0.6428571	0.03115079	uc009rbt.1	17346	15255	15354	NM_144813	1000	900	1000	93	6	-
NM_028006	up	uc009rbt.1	up	0.7857143	0.005505952	uc009rbt.1	17346	6322	6375	NM_028006	1000	872	929	49	0	+
NM_001177810	up	uc009rbt.1	up	0.8571429	0.001736111	uc009rbt.1	17346	6332	6405	NM_001177810	1000	16	82	59	0	-
NM_178619	up	uc009rbt.1	up	0.6428571	0.03115079	uc009rbt.1	17346	10771	10909	NM_178619	1000	610	977	129	8	-
NM_009052	up	uc009rbt.1	up	0.8571429	0.001736111	uc009rbt.1	17346	12552	12590	NM_009052	1000	223	260	36	0	-
NM_001177659	up	uc009rbt.1	up	0.7142857	0.0141369	uc009rbt.1	17346	10789	10908	NM_001177659	1000	431	649	115	4	-
NM_001113213	up	uc009rbt.1	up	0.6428571	0.03115079	uc009rbt.1	17346	10789	10908	NM_001113213	1000	431	649	115	4	-
NM_025674	up	uc009rbt.1	up	0.7142857	0.0141369	uc009rbt.1	17346	12943	13110	NM_025674	1000	580	754	154	13	-
NM_011496	up	uc009rbt.1	up	0.7142857	0.0141369	uc009rbt.1	17346	10768	12410	NM_011496	1000	516	925	186	16	-
NM_010892	up	uc009rbt.1	up	0.7857143	0.005505952	uc009rbt.1	17346	10812	13112	NM_010892	1000	280	818	206	14	-
NM_016879	up	ENSMUST00000119202	up	0.7142857	0.0141369	ENSMUST00000119202	48211	21873	22059	NM_016879	1000	495	665	145	7	+
NM_016879	up	ENSMUST00000119202	up	0.7142857	0.0141369	ENSMUST00000119202	48211	39125	39216	NM_016879	1000	529	621	88	3	+
NM_175933	up	ENSMUST00000119202	up	0.6428571	0.03115079	ENSMUST00000119202	48211	10916	11049	NM_175933	1000	844	978	119	6	+
NM_175933	up	ENSMUST00000119202	up	0.6428571	0.03115079	ENSMUST00000119202	48211	28176	28296	NM_175933	1000	850	970	108	12	-
NM_133991	up	ENSMUST00000119202	up	0.7142857	0.0141369	ENSMUST00000119202	48211	11515	11571	NM_133991	1000	649	705	52	3	+
NM_133991	up	ENSMUST00000119202	up	0.7142857	0.0141369	ENSMUST00000119202	48211	20374	22055	NM_133991	1000	32	285	203	10	-
NM_178619	up	ENSMUST00000119202	up	0.7142857	0.0141369	ENSMUST00000119202	48211	5589	28296	NM_178619	1000	622	967	211	15	+
NM_178619	up	ENSMUST00000119202	up	0.7142857	0.0141369	ENSMUST00000119202	48211	5591	5703	NM_178619	1000	853	967	101	11	+
NM_178619	up	ENSMUST00000119202	up	0.7142857	0.0141369	ENSMUST00000119202	48211	7741	11049	NM_178619	1000	611	971	225	15	-
NM_178619	up	ENSMUST00000119202	up	0.7142857	0.0141369	ENSMUST00000119202	48211	10907	20197	NM_178619	1000	608	982	203	13	-
NM_178619	up	ENSMUST00000119202	up	0.7142857	0.0141369	ENSMUST00000119202	48211	20063	20197	NM_178619	1000	822	965	120	6	-
NM_178619	up	ENSMUST00000119202	up	0.7142857	0.0141369	ENSMUST00000119202	48211	855	914	NM_178619	1000	866	925	59	0	-
NM_025401	up	ENSMUST00000119202	up	0.6428571	0.03115079	ENSMUST00000119202	48211	28169	28294	NM_025401	1000	412	537	111	7	+
NM_025401	up	ENSMUST00000119202	up	0.6428571	0.03115079	ENSMUST00000119202	48211	681	11064	NM_025401	1000	400	703	154	10	-
NM_025401	up	ENSMUST00000119202	up	0.6428571	0.03115079	ENSMUST00000119202	48211	7748	7872	NM_025401	1000	412	536	112	12	-
NM_025401	up	ENSMUST00000119202	up	0.6428571	0.03115079	ENSMUST00000119202	48211	854	914	NM_025401	1000	438	498	57	3	-
NM_024184	up	ENSMUST00000119202	up	0.6428571	0.03115079	ENSMUST00000119202	48211	28169	28296	NM_024184	1000	222	349	117	10	+
NM_024184	up	ENSMUST00000119202	up	0.6428571	0.03115079	ENSMUST00000119202	48211	5589	5703	NM_024184	1000	233	349	103	11	+
NM_024184	up	ENSMUST00000119202	up	0.6428571	0.03115079	ENSMUST00000119202	48211	20067	20191	NM_024184	1000	219	343	115	9	-
NM_024184	up	ENSMUST00000119202	up	0.6428571	0.03115079	ENSMUST00000119202	48211	10916	11052	NM_024184	1000	219	355	128	8	-
NM_024184	up	ENSMUST00000119202	up	0.6428571	0.03115079	ENSMUST00000119202	48211	7751	7872	NM_024184	1000	222	343	111	10	-
NM_024184	up	ENSMUST00000119202	up	0.6428571	0.03115079	ENSMUST00000119202	48211	854	910	NM_024184	1000	252	308	53	3	-
NM_011496	up	ENSMUST00000119202	up	0.6428571	0.03115079	ENSMUST00000119202	48211	28182	28290	NM_011496	1000	797	905	101	7	+
NM_011496	up	ENSMUST00000119202	up	0.6428571	0.03115079	ENSMUST00000119202	48211	36546	36596	NM_011496	1000	550	601	49	1	+
NM_011496	up	ENSMUST00000119202	up	0.6428571	0.03115079	ENSMUST00000119202	48211	808	914	NM_011496	1000	810	917	99	7	-
NM_011496	up	ENSMUST00000119202	up	0.6428571	0.03115079	ENSMUST00000119202	48211	20057	20150	NM_011496	1000	822	917	86	7	-
NM_001177659	up	ENSMUST00000119202	up	0.7857143	0.005505952	ENSMUST00000119202	48211	28152	28275	NM_001177659	1000	504	635	120	1	+
NM_001177659	up	ENSMUST00000119202	up	0.7857143	0.005505952	ENSMUST00000119202	48211	5589	5698	NM_001177659	1000	442	649	93	7	+
NM_001177659	up	ENSMUST00000119202	up	0.7857143	0.005505952	ENSMUST00000119202	48211	20067	20175	NM_001177659	1000	542	650	101	7	-
NM_001177659	up	ENSMUST00000119202	up	0.7857143	0.005505952	ENSMUST00000119202	48211	820	914	NM_001177659	1000	555	650	89	4	-
NM_001177659	up	ENSMUST00000119202	up	0.7857143	0.005505952	ENSMUST00000119202	48211	10929	11034	NM_001177659	1000	544	649	93	3	-
NM_001113213	up	ENSMUST00000119202	up	0.7142857	0.0141369	ENSMUST00000119202	48211	28152	28275	NM_001113213	1000	504	635	120	1	+
NM_001113213	up	ENSMUST00000119202	up	0.7142857	0.0141369	ENSMUST00000119202	48211	5589	5698	NM_001113213	1000	442	649	93	7	+
NM_001113213	up	ENSMUST00000119202	up	0.7142857	0.0141369	ENSMUST00000119202	48211	20067	20175	NM_001113213	1000	542	650	101	7	-
NM_001113213	up	ENSMUST00000119202	up	0.7142857	0.0141369	ENSMUST00000119202	48211	820	914	NM_001113213	1000	555	650	89	4	-
NM_001113213	up	ENSMUST00000119202	up	0.7142857	0.0141369	ENSMUST00000119202	48211	10929	11034	NM_001113213	1000	544	649	93	3	-
NM_176830	up	ENSMUST00000119202	up	0.7142857	0.0141369	ENSMUST00000119202	48211	10929	11014	NM_176830	1000	915	1000	82	3	+
NM_176830	up	ENSMUST00000119202	up	0.7142857	0.0141369	ENSMUST00000119202	48211	20051	20153	NM_176830	1000	893	1000	94	8	+
NM_176830	up	ENSMUST00000119202	up	0.7142857	0.0141369	ENSMUST00000119202	48211	854	905	NM_176830	1000	949	1000	49	2	+
NM_176830	up	ENSMUST00000119202	up	0.7142857	0.0141369	ENSMUST00000119202	48211	5613	5698	NM_176830	1000	915	1000	79	6	-
NM_176830	up	ENSMUST00000119202	up	0.7142857	0.0141369	ENSMUST00000119202	48211	28204	28290	NM_176830	1000	914	1000	73	4	-
NM_018883	up	ENSMUST00000119202	up	0.6428571	0.03115079	ENSMUST00000119202	48211	10953	22060	NM_018883	1000	221	528	274	24	+
NM_018883	up	ENSMUST00000119202	up	0.6428571	0.03115079	ENSMUST00000119202	48211	39125	39258	NM_018883	1000	390	523	123	10	+
NM_018883	up	ENSMUST00000119202	up	0.6428571	0.03115079	ENSMUST00000119202	48211	841	914	NM_018883	1000	223	291	66	2	+
NM_018883	up	ENSMUST00000119202	up	0.6428571	0.03115079	ENSMUST00000119202	48211	28153	28273	NM_018883	1000	213	345	111	9	-
NM_001184706	up	ENSMUST00000119202	up	0.7857143	0.005505952	ENSMUST00000119202	48211	20373	20562	NM_001184706	1000	343	525	167	8	-
NM_144813	up	uc008yyk.1	up	0.7142857	0.0141369	uc008yyk.1	21074	10775	10888	NM_144813	1000	886	1000	98	8	+
NM_144813	up	uc008yyk.1	up	0.7142857	0.0141369	uc008yyk.1	21074	18146	18246	NM_144813	1000	900	1000	98	2	-
NM_144813	up	uc008yyk.1	up	0.7142857	0.0141369	uc008yyk.1	21074	1371	1474	NM_144813	1000	100	201	97	3	-
NM_144813	up	uc008yyk.1	up	0.7142857	0.0141369	uc008yyk.1	21074	13157	13257	NM_144813	1000	900	1000	93	7	-
NM_144813	up	uc008yyk.1	up	0.7142857	0.0141369	uc008yyk.1	21074	9990	10054	NM_144813	1000	936	1000	60	4	-
NM_025674	up	uc008yyk.1	up	0.6428571	0.03115079	uc008yyk.1	21074	17741	18247	NM_025674	1000	446	756	138	10	+
NM_025674	up	uc008yyk.1	up	0.6428571	0.03115079	uc008yyk.1	21074	18086	18249	NM_025674	1000	365	524	141	8	-
NM_022986	up	uc008yyk.1	up	0.6428571	0.03115079	uc008yyk.1	21074	11349	11389	NM_022986	1000	141	181	39	1	+
NM_016879	up	uc008yyk.1	up	0.7142857	0.0141369	uc008yyk.1	21074	13130	13254	NM_016879	1000	538	661	102	7	+
NM_016879	up	uc008yyk.1	up	0.7142857	0.0141369	uc008yyk.1	21074	18111	18240	NM_016879	1000	530	658	110	4	+
NM_009773	up	uc008yyk.1	up	0.6428571	0.03115079	uc008yyk.1	21074	15705	15735	NM_009773	1000	206	236	30	0	+
NM_199196	up	uc008yyk.1	up	0.7142857	0.0141369	uc008yyk.1	21074	7016	7127	NM_199196	1000	887	997	92	4	+
NM_199196	up	uc008yyk.1	up	0.7142857	0.0141369	uc008yyk.1	21074	1348	1441	NM_199196	1000	700	964	86	2	+
NM_178619	up	uc008yyk.1	up	0.8571429	0.001736111	uc008yyk.1	21074	7020	7144	NM_178619	1000	841	964	109	6	+
NM_178619	up	uc008yyk.1	up	0.8571429	0.001736111	uc008yyk.1	21074	1384	1476	NM_178619	1000	853	943	88	1	+
NM_178619	up	uc008yyk.1	up	0.8571429	0.001736111	uc008yyk.1	21074	16617	18074	NM_178619	1000	116	973	151	12	-
NM_030725	up	uc008yyk.1	up	0.7142857	0.0141369	uc008yyk.1	21074	18046	18076	NM_030725	1000	124	154	30	0	+
NM_030725	up	uc008yyk.1	up	0.7142857	0.0141369	uc008yyk.1	21074	9577	9633	NM_030725	1000	323	369	44	2	-
NM_001113213	up	uc008yyk.1	up	0.7142857	0.0141369	uc008yyk.1	21074	7034	7141	NM_001113213	1000	542	650	102	5	+
NM_001113213	up	uc008yyk.1	up	0.7142857	0.0141369	uc008yyk.1	21074	1371	1474	NM_001113213	1000	531	630	97	0	+
NM_177619	up	uc008yyk.1	up	0.7857143	0.005505952	uc008yyk.1	21074	1360	1474	NM_177619	1000	354	468	102	5	-
NM_199196	up	AK138865	up	0.7142857	0.0141369	AK138865	3177	2417	2489	NM_199196	1000	880	953	68	3	+
NM_178619	up	AK138865	up	0.7142857	0.0141369	AK138865	3177	2400	2570	NM_178619	1000	820	980	146	7	+
NM_024184	up	AK138865	up	0.6428571	0.03115079	AK138865	3177	2430	2567	NM_024184	1000	222	360	118	10	+
NM_011496	up	AK138865	up	0.6428571	0.03115079	AK138865	3177	2443	2567	NM_011496	1000	797	922	114	10	+
NM_001177659	up	AK138865	up	0.6428571	0.03115079	AK138865	3177	2416	2559	NM_001177659	1000	497	659	129	7	+
NM_001113213	up	AK138865	up	0.7142857	0.0141369	AK138865	3177	2416	2559	NM_001113213	1000	497	659	129	7	+
NM_177619	up	AK089902	up	0.7142857	0.0141369	AK089902	1751	1453	1587	NM_177619	1000	323	461	121	13	+
NM_176830	up	AK089902	up	0.6428571	0.03115079	AK089902	1751	1451	1547	NM_176830	1000	901	1000	88	8	+
NM_144813	up	AK089902	up	0.7857143	0.005505952	AK089902	1751	1478	1598	NM_144813	1000	97	217	111	8	+
NM_199196	up	AK089902	up	0.6428571	0.03115079	AK089902	1751	1512	1604	NM_199196	1000	870	964	84	2	-
NM_178619	up	AK089902	up	0.6428571	0.03115079	AK089902	1751	1451	1587	NM_178619	1000	605	742	124	11	-
NM_024184	up	AK089902	up	0.7142857	0.0141369	AK089902	1751	1461	1589	NM_024184	1000	214	343	119	9	-
NM_001177659	up	AK089902	up	0.7142857	0.0141369	AK089902	1751	1461	1606	NM_001177659	1000	498	650	130	7	-
NM_001113213	up	AK089902	up	0.6428571	0.03115079	AK089902	1751	1461	1606	NM_001113213	1000	498	650	130	7	-
NM_176830	up	ENSMUST00000124795	up	0.7857143	0.005505952	ENSMUST00000124795	15974	4831	4914	NM_176830	1000	917	1000	76	7	+
NM_176830	up	ENSMUST00000124795	up	0.7857143	0.005505952	ENSMUST00000124795	15974	820	906	NM_176830	1000	914	1000	83	1	-
NM_144813	up	ENSMUST00000124795	up	0.6428571	0.03115079	ENSMUST00000124795	15974	4845	4948	NM_144813	1000	97	200	97	6	+
NM_144813	up	ENSMUST00000124795	up	0.6428571	0.03115079	ENSMUST00000124795	15974	779	887	NM_144813	1000	99	207	102	6	-
NM_144813	up	ENSMUST00000124795	up	0.6428571	0.03115079	ENSMUST00000124795	15974	13883	13963	NM_144813	1000	98	184	75	5	-
NM_025674	up	ENSMUST00000124795	up	0.7142857	0.0141369	ENSMUST00000124795	15974	14775	14942	NM_025674	1000	586	756	152	15	+
NM_024184	up	ENSMUST00000124795	up	0.7142857	0.0141369	ENSMUST00000124795	15974	758	918	NM_024184	1000	195	355	147	13	+
NM_024184	up	ENSMUST00000124795	up	0.7142857	0.0141369	ENSMUST00000124795	15974	4831	4948	NM_024184	1000	223	340	108	9	-
NM_011496	up	ENSMUST00000124795	up	0.8571429	0.001736111	ENSMUST00000124795	15974	798	882	NM_011496	1000	797	881	80	4	+
NM_011496	up	ENSMUST00000124795	up	0.8571429	0.001736111	ENSMUST00000124795	15974	4840	4936	NM_011496	1000	797	893	88	8	-
NM_010892	up	ENSMUST00000124795	up	0.7857143	0.005505952	ENSMUST00000124795	15974	14775	14906	NM_010892	1000	288	413	120	5	+
NM_001113213	up	ENSMUST00000124795	up	0.6428571	0.03115079	ENSMUST00000124795	15974	772	906	NM_001113213	1000	497	650	123	9	+
NM_001113213	up	ENSMUST00000124795	up	0.6428571	0.03115079	ENSMUST00000124795	15974	13883	14077	NM_001113213	1000	546	658	100	5	+
NM_001113213	up	ENSMUST00000124795	up	0.6428571	0.03115079	ENSMUST00000124795	15974	4831	4948	NM_001113213	1000	432	647	109	8	-
NM_178619	up	NR_027896	up	0.8571429	0.001736111	NR_027896	7708	1463	1621	NM_178619	1000	816	981	147	6	+
NM_025401	up	NR_027896	up	0.6428571	0.03115079	NR_027896	7708	1473	1620	NM_025401	1000	406	552	135	11	+
NM_024184	up	NR_027896	up	0.6428571	0.03115079	NR_027896	7708	1478	1611	NM_024184	1000	221	354	124	9	+
NM_011496	up	NR_027896	up	0.7857143	0.005505952	NR_027896	7708	1492	1611	NM_011496	1000	797	916	111	6	+
NM_001177659	up	NR_027896	up	0.6428571	0.03115079	NR_027896	7708	1478	1599	NM_001177659	1000	430	649	111	5	+
NM_001113213	up	NR_027896	up	0.8571429	0.001736111	NR_027896	7708	1478	1599	NM_001113213	1000	430	649	111	5	+
NM_177619	up	NR_027896	up	0.6428571	0.03115079	NR_027896	7708	1472	1599	NM_177619	1000	335	462	121	6	-
NM_176830	up	NR_027896	up	0.7142857	0.0141369	NR_027896	7708	1514	1599	NM_176830	1000	915	1000	81	4	-
NM_175933	up	NR_027896	up	0.7857143	0.005505952	NR_027896	7708	1461	1611	NM_175933	1000	845	994	137	10	-
NM_144813	up	NR_027896	up	0.7142857	0.0141369	NR_027896	7708	1464	1581	NM_144813	1000	99	220	114	2	-
NM_025674	up	NR_027896	up	0.6428571	0.03115079	NR_027896	7708	1467	1611	NM_025674	1000	798	948	133	11	-
NM_001198914	up	NR_027896	up	0.6428571	0.03115079	NR_027896	7708	1464	1621	NM_001198914	1000	328	487	145	6	-
NM_001184706	up	ENSMUST00000170938	up	0.7142857	0.0141369	ENSMUST00000170938	7185	4604	4789	NM_001184706	1000	343	524	164	7	+
NM_144813	up	ENSMUST00000170938	up	0.6428571	0.03115079	ENSMUST00000170938	7185	1226	2658	NM_144813	1000	97	999	160	11	-
NM_001113213	up	uc007khb.1	up	0.6428571	0.03115079	uc007khb.1	19991	7901	7986	NM_001113213	1000	429	609	74	6	+
NM_001113213	up	uc007khb.1	up	0.6428571	0.03115079	uc007khb.1	19991	19883	19980	NM_001113213	1000	552	648	53	0	+
NM_001113213	up	uc007khb.1	up	0.6428571	0.03115079	uc007khb.1	19991	1877	2028	NM_001113213	1000	416	658	127	8	-
NM_198622	up	uc007khb.1	up	0.7142857	0.0141369	uc007khb.1	19991	2536	2567	NM_198622	1000	965	996	31	0	+
NM_144813	up	uc007khb.1	up	0.6428571	0.03115079	uc007khb.1	19991	7332	7406	NM_144813	1000	926	1000	69	5	+
NM_025401	up	uc007khb.1	up	0.7142857	0.0141369	uc007khb.1	19991	1885	1978	NM_025401	1000	440	533	85	8	-
NM_178619	up	uc007khb.1	up	0.7857143	0.005505952	uc007khb.1	19991	1885	2031	NM_178619	1000	819	961	134	7	-
NM_009542	up	ENSMUST00000133852	up	0.6428571	0.03115079	ENSMUST00000133852	25634	415	471	NM_009542	1000	548	605	54	2	+
NM_001168693	up	ENSMUST00000151921	up	0.8571429	0.001736111	ENSMUST00000151921	110594	59914	59981	NM_001168693	1000	737	807	49	1	+
NM_176830	up	ENSMUST00000151921	up	0.6428571	0.03115079	ENSMUST00000151921	110594	44631	44717	NM_176830	1000	914	1000	83	3	+
NM_176830	up	ENSMUST00000151921	up	0.6428571	0.03115079	ENSMUST00000151921	110594	95438	95523	NM_176830	1000	915	1000	81	4	+
NM_176830	up	ENSMUST00000151921	up	0.6428571	0.03115079	ENSMUST00000151921	110594	47942	48014	NM_176830	1000	898	1000	69	3	+
NM_176830	up	ENSMUST00000151921	up	0.6428571	0.03115079	ENSMUST00000151921	110594	96484	96523	NM_176830	1000	944	985	39	0	+
NM_176830	up	ENSMUST00000151921	up	0.6428571	0.03115079	ENSMUST00000151921	110594	46283	46388	NM_176830	1000	894	1000	101	3	-
NM_176830	up	ENSMUST00000151921	up	0.6428571	0.03115079	ENSMUST00000151921	110594	14390	14492	NM_176830	1000	897	1000	94	8	-
NM_176830	up	ENSMUST00000151921	up	0.6428571	0.03115079	ENSMUST00000151921	110594	26113	26218	NM_176830	1000	894	1000	95	10	-
NM_176830	up	ENSMUST00000151921	up	0.6428571	0.03115079	ENSMUST00000151921	110594	78679	78764	NM_176830	1000	915	1000	82	3	-
NM_176830	up	ENSMUST00000151921	up	0.6428571	0.03115079	ENSMUST00000151921	110594	70299	70385	NM_176830	1000	914	1000	80	6	-
NM_176830	up	ENSMUST00000151921	up	0.6428571	0.03115079	ENSMUST00000151921	110594	20266	20348	NM_176830	1000	918	1000	76	6	-
NM_030725	up	ENSMUST00000151921	up	0.6428571	0.03115079	ENSMUST00000151921	110594	66253	87281	NM_030725	1000	107	367	111	2	+
NM_030725	up	ENSMUST00000151921	up	0.6428571	0.03115079	ENSMUST00000151921	110594	65977	104466	NM_030725	1000	127	350	63	3	+
NM_030725	up	ENSMUST00000151921	up	0.6428571	0.03115079	ENSMUST00000151921	110594	74686	103789	NM_030725	1000	141	368	67	2	-
NM_026280	up	ENSMUST00000151921	up	1	4.96E-05	ENSMUST00000151921	110594	66426	66481	NM_026280	1000	44	104	53	2	+
NM_026280	up	ENSMUST00000151921	up	1	4.96E-05	ENSMUST00000151921	110594	13116	13164	NM_026280	1000	39	110	42	1	+
NM_026280	up	ENSMUST00000151921	up	1	4.96E-05	ENSMUST00000151921	110594	74700	74739	NM_026280	1000	68	107	39	0	-
NM_025401	up	ENSMUST00000151921	up	0.7142857	0.0141369	ENSMUST00000151921	110594	59844	60003	NM_025401	1000	395	552	147	10	+
NM_025401	up	ENSMUST00000151921	up	0.7142857	0.0141369	ENSMUST00000151921	110594	46243	46388	NM_025401	1000	406	552	136	9	+
NM_025401	up	ENSMUST00000151921	up	0.7142857	0.0141369	ENSMUST00000151921	110594	78631	78782	NM_025401	1000	394	549	135	8	+
NM_025401	up	ENSMUST00000151921	up	0.7142857	0.0141369	ENSMUST00000151921	110594	26043	26218	NM_025401	1000	392	552	139	8	+
NM_025401	up	ENSMUST00000151921	up	0.7142857	0.0141369	ENSMUST00000151921	110594	14364	14512	NM_025401	1000	421	572	127	11	+
NM_025401	up	ENSMUST00000151921	up	0.7142857	0.0141369	ENSMUST00000151921	110594	20233	20372	NM_025401	1000	413	552	119	8	+
NM_025401	up	ENSMUST00000151921	up	0.7142857	0.0141369	ENSMUST00000151921	110594	45776	45918	NM_025401	1000	412	553	132	9	-
NM_025401	up	ENSMUST00000151921	up	0.7142857	0.0141369	ENSMUST00000151921	110594	95418	95578	NM_025401	1000	404	552	137	10	-
NM_025401	up	ENSMUST00000151921	up	0.7142857	0.0141369	ENSMUST00000151921	110594	44627	44750	NM_025401	1000	414	537	116	7	-
NM_025401	up	ENSMUST00000151921	up	0.7142857	0.0141369	ENSMUST00000151921	110594	47946	48081	NM_025401	1000	394	545	109	6	-
NM_018883	up	ENSMUST00000151921	up	0.7142857	0.0141369	ENSMUST00000151921	110594	44648	48059	NM_018883	1000	213	349	120	6	+
NM_018883	up	ENSMUST00000151921	up	0.7142857	0.0141369	ENSMUST00000151921	110594	81858	81964	NM_018883	1000	213	340	97	5	+
NM_018883	up	ENSMUST00000151921	up	0.7142857	0.0141369	ENSMUST00000151921	110594	95456	95552	NM_018883	1000	215	311	88	8	+
NM_018883	up	ENSMUST00000151921	up	0.7142857	0.0141369	ENSMUST00000151921	110594	47978	48018	NM_018883	1000	246	286	38	2	+
NM_018883	up	ENSMUST00000151921	up	0.7142857	0.0141369	ENSMUST00000151921	110594	96484	96521	NM_018883	1000	226	265	37	0	+
NM_018883	up	ENSMUST00000151921	up	0.7142857	0.0141369	ENSMUST00000151921	110594	20218	20335	NM_018883	1000	213	339	108	9	-
NM_018883	up	ENSMUST00000151921	up	0.7142857	0.0141369	ENSMUST00000151921	110594	59854	59964	NM_018883	1000	215	325	101	9	-
NM_018883	up	ENSMUST00000151921	up	0.7142857	0.0141369	ENSMUST00000151921	110594	70246	70367	NM_018883	1000	214	350	110	9	-
NM_001177659	up	ENSMUST00000151921	up	0.7142857	0.0141369	ENSMUST00000151921	110594	20231	46383	NM_001177659	1000	429	829	195	4	+
NM_001177659	up	ENSMUST00000151921	up	0.7142857	0.0141369	ENSMUST00000151921	110594	59858	59983	NM_001177659	1000	527	650	114	9	+
NM_001177659	up	ENSMUST00000151921	up	0.7142857	0.0141369	ENSMUST00000151921	110594	14368	14485	NM_001177659	1000	542	659	107	10	+
NM_001177659	up	ENSMUST00000151921	up	0.7142857	0.0141369	ENSMUST00000151921	110594	78655	78764	NM_001177659	1000	442	649	105	3	+
NM_001177659	up	ENSMUST00000151921	up	0.7142857	0.0141369	ENSMUST00000151921	110594	26071	26199	NM_001177659	1000	530	650	107	7	+
NM_001177659	up	ENSMUST00000151921	up	0.7142857	0.0141369	ENSMUST00000151921	110594	70278	70385	NM_001177659	1000	543	650	98	9	+
NM_001177659	up	ENSMUST00000151921	up	0.7142857	0.0141369	ENSMUST00000151921	110594	20255	20348	NM_001177659	1000	553	646	89	4	+
NM_001177659	up	ENSMUST00000151921	up	0.7142857	0.0141369	ENSMUST00000151921	110594	45798	95569	NM_001177659	1000	415	649	155	7	-
NM_001177659	up	ENSMUST00000151921	up	0.7142857	0.0141369	ENSMUST00000151921	110594	44631	44750	NM_001177659	1000	533	650	110	7	-
NM_001177659	up	ENSMUST00000151921	up	0.7142857	0.0141369	ENSMUST00000151921	110594	95438	96566	NM_001177659	1000	537	649	108	4	-
NM_001177659	up	ENSMUST00000151921	up	0.7142857	0.0141369	ENSMUST00000151921	110594	81842	81945	NM_001177659	1000	546	649	97	6	-
NM_001177659	up	ENSMUST00000151921	up	0.7142857	0.0141369	ENSMUST00000151921	110594	16429	16538	NM_001177659	1000	542	649	64	2	-
NM_001177659	up	ENSMUST00000151921	up	0.7142857	0.0141369	ENSMUST00000151921	110594	47978	48020	NM_001177659	1000	558	600	41	1	-
NM_001141975	up	ENSMUST00000151921	up	0.6428571	0.03115079	ENSMUST00000151921	110594	13700	13752	NM_001141975	1000	6	58	51	1	+
NM_001141975	up	ENSMUST00000151921	up	0.6428571	0.03115079	ENSMUST00000151921	110594	4670	4724	NM_001141975	1000	0	56	51	3	-
NM_001113213	up	ENSMUST00000151921	up	0.6428571	0.03115079	ENSMUST00000151921	110594	20231	46383	NM_001113213	1000	429	829	195	4	+
NM_001113213	up	ENSMUST00000151921	up	0.6428571	0.03115079	ENSMUST00000151921	110594	59858	59983	NM_001113213	1000	527	650	114	9	+
NM_001113213	up	ENSMUST00000151921	up	0.6428571	0.03115079	ENSMUST00000151921	110594	14368	14485	NM_001113213	1000	542	659	107	10	+
NM_001113213	up	ENSMUST00000151921	up	0.6428571	0.03115079	ENSMUST00000151921	110594	78655	78764	NM_001113213	1000	442	649	105	3	+
NM_001113213	up	ENSMUST00000151921	up	0.6428571	0.03115079	ENSMUST00000151921	110594	26071	26199	NM_001113213	1000	530	650	107	7	+
NM_001113213	up	ENSMUST00000151921	up	0.6428571	0.03115079	ENSMUST00000151921	110594	70278	70385	NM_001113213	1000	543	650	98	9	+
NM_001113213	up	ENSMUST00000151921	up	0.6428571	0.03115079	ENSMUST00000151921	110594	20255	20348	NM_001113213	1000	553	646	89	4	+
NM_001113213	up	ENSMUST00000151921	up	0.6428571	0.03115079	ENSMUST00000151921	110594	45798	95569	NM_001113213	1000	415	649	155	7	-
NM_001113213	up	ENSMUST00000151921	up	0.6428571	0.03115079	ENSMUST00000151921	110594	44631	44750	NM_001113213	1000	533	650	110	7	-
NM_001113213	up	ENSMUST00000151921	up	0.6428571	0.03115079	ENSMUST00000151921	110594	95438	96566	NM_001113213	1000	537	649	108	4	-
NM_001113213	up	ENSMUST00000151921	up	0.6428571	0.03115079	ENSMUST00000151921	110594	81842	81945	NM_001113213	1000	546	649	97	6	-
NM_001113213	up	ENSMUST00000151921	up	0.6428571	0.03115079	ENSMUST00000151921	110594	16429	16538	NM_001113213	1000	542	649	64	2	-
NM_001113213	up	ENSMUST00000151921	up	0.6428571	0.03115079	ENSMUST00000151921	110594	47978	48020	NM_001113213	1000	558	600	41	1	-
NM_001038499	up	ENSMUST00000151921	up	0.8571429	0.001736111	ENSMUST00000151921	110594	87048	87152	NM_001038499	1000	809	882	68	0	+
NM_001038499	up	ENSMUST00000151921	up	0.8571429	0.001736111	ENSMUST00000151921	110594	19827	67200	NM_001038499	1000	811	968	92	5	-
NM_001013749	up	ENSMUST00000151921	up	0.7142857	0.0141369	ENSMUST00000151921	110594	86900	86970	NM_001013749	1000	151	229	58	2	+
NM_178619	up	ENSMUST00000151921	up	0.6428571	0.03115079	ENSMUST00000151921	110594	19761	78788	NM_178619	1000	287	983	313	17	+
NM_178619	up	ENSMUST00000151921	up	0.6428571	0.03115079	ENSMUST00000151921	110594	20233	46390	NM_178619	1000	611	982	255	17	+
NM_178619	up	ENSMUST00000151921	up	0.6428571	0.03115079	ENSMUST00000151921	110594	14364	60004	NM_178619	1000	620	981	244	15	+
NM_178619	up	ENSMUST00000151921	up	0.6428571	0.03115079	ENSMUST00000151921	110594	59855	70396	NM_178619	1000	606	972	214	14	+
NM_178619	up	ENSMUST00000151921	up	0.6428571	0.03115079	ENSMUST00000151921	110594	14322	14492	NM_178619	1000	820	977	142	8	+
NM_178619	up	ENSMUST00000151921	up	0.6428571	0.03115079	ENSMUST00000151921	110594	26056	26219	NM_178619	1000	824	981	139	7	+
NM_178619	up	ENSMUST00000151921	up	0.6428571	0.03115079	ENSMUST00000151921	110594	20255	20372	NM_178619	1000	864	980	106	9	+
NM_178619	up	ENSMUST00000151921	up	0.6428571	0.03115079	ENSMUST00000151921	110594	44614	66284	NM_178619	1000	102	977	312	21	-
NM_178619	up	ENSMUST00000151921	up	0.6428571	0.03115079	ENSMUST00000151921	110594	81842	89589	NM_178619	1000	611	960	157	13	-
NM_178619	up	ENSMUST00000151921	up	0.6428571	0.03115079	ENSMUST00000151921	110594	95417	95566	NM_178619	1000	605	981	139	3	-
NM_178619	up	ENSMUST00000151921	up	0.6428571	0.03115079	ENSMUST00000151921	110594	44640	44745	NM_178619	1000	618	723	103	2	-
NM_016879	up	ENSMUST00000151921	up	0.6428571	0.03115079	ENSMUST00000151921	110594	76556	76598	NM_016879	1000	575	618	41	1	-
NM_026735	up	ENSMUST00000151921	up	0.6428571	0.03115079	ENSMUST00000151921	110594	45802	97906	NM_026735	1000	229	295	60	2	-
NM_133991	up	ENSMUST00000151921	up	0.6428571	0.03115079	ENSMUST00000151921	110594	45790	45821	NM_133991	1000	883	914	31	0	-
NM_001177810	up	uc007pyi.1	up	0.8571429	0.001736111	uc007pyi.1	423545	310562	310622	NM_001177810	1000	17	72	52	3	+
NM_001177810	up	uc007pyi.1	up	0.8571429	0.001736111	uc007pyi.1	423545	248634	248698	NM_001177810	1000	16	80	62	2	-
NM_001177810	up	uc007pyi.1	up	0.8571429	0.001736111	uc007pyi.1	423545	189249	189294	NM_001177810	1000	31	76	45	0	-
NM_028006	up	uc007pyi.1	up	0.6428571	0.03115079	uc007pyi.1	423545	310550	310617	NM_028006	1000	845	929	57	3	+
NM_028006	up	uc007pyi.1	up	0.6428571	0.03115079	uc007pyi.1	423545	248608	248675	NM_028006	1000	882	929	47	0	+
NM_028006	up	uc007pyi.1	up	0.6428571	0.03115079	uc007pyi.1	423545	189249	189286	NM_028006	1000	892	929	37	0	+
NM_028006	up	uc007pyi.1	up	0.6428571	0.03115079	uc007pyi.1	423545	229477	229521	NM_028006	1000	885	929	43	1	-
NM_028006	up	uc007pyi.1	up	0.6428571	0.03115079	uc007pyi.1	423545	403369	403418	NM_028006	1000	882	929	41	0	-
NM_016679	up	uc007pyi.1	up	0.7142857	0.0141369	uc007pyi.1	423545	116264	116319	NM_016679	1000	218	276	51	4	+
NM_001198914	up	uc007pyi.1	up	0.7142857	0.0141369	uc007pyi.1	423545	116224	116367	NM_001198914	1000	329	471	132	6	+
NM_001198914	up	uc007pyi.1	up	0.7142857	0.0141369	uc007pyi.1	423545	302502	302637	NM_001198914	1000	335	470	124	11	+
NM_001198914	up	uc007pyi.1	up	0.7142857	0.0141369	uc007pyi.1	423545	207267	207397	NM_001198914	1000	332	463	120	9	+
NM_001198914	up	uc007pyi.1	up	0.7142857	0.0141369	uc007pyi.1	423545	64654	64776	NM_001198914	1000	337	484	115	4	+
NM_001198914	up	uc007pyi.1	up	0.7142857	0.0141369	uc007pyi.1	423545	40915	41036	NM_001198914	1000	348	469	111	10	+
NM_001198914	up	uc007pyi.1	up	0.7142857	0.0141369	uc007pyi.1	423545	8102	8257	NM_001198914	1000	327	482	145	10	-
NM_001198914	up	uc007pyi.1	up	0.7142857	0.0141369	uc007pyi.1	423545	119747	119902	NM_001198914	1000	327	481	144	8	-
NM_001198914	up	uc007pyi.1	up	0.7142857	0.0141369	uc007pyi.1	423545	198647	198791	NM_001198914	1000	337	480	135	8	-
NM_001198914	up	uc007pyi.1	up	0.7142857	0.0141369	uc007pyi.1	423545	121836	121986	NM_001198914	1000	333	482	139	9	-
NM_001198914	up	uc007pyi.1	up	0.7142857	0.0141369	uc007pyi.1	423545	3264	3409	NM_001198914	1000	336	482	135	8	-
NM_001198914	up	uc007pyi.1	up	0.7142857	0.0141369	uc007pyi.1	423545	214661	214817	NM_001198914	1000	337	487	140	6	-
NM_001198914	up	uc007pyi.1	up	0.7142857	0.0141369	uc007pyi.1	423545	99082	99223	NM_001198914	1000	345	484	131	5	-
NM_001198914	up	uc007pyi.1	up	0.7142857	0.0141369	uc007pyi.1	423545	248810	248971	NM_001198914	1000	336	486	134	12	-
NM_001198914	up	uc007pyi.1	up	0.7142857	0.0141369	uc007pyi.1	423545	18336	18470	NM_001198914	1000	348	481	125	8	-
NM_001198914	up	uc007pyi.1	up	0.7142857	0.0141369	uc007pyi.1	423545	137371	137496	NM_001198914	1000	332	456	118	6	-
NM_001198914	up	uc007pyi.1	up	0.7142857	0.0141369	uc007pyi.1	423545	11697	11815	NM_001198914	1000	352	470	113	5	-
NM_001198914	up	uc007pyi.1	up	0.7142857	0.0141369	uc007pyi.1	423545	184150	184268	NM_001198914	1000	347	465	112	6	-
NM_001198914	up	uc007pyi.1	up	0.7142857	0.0141369	uc007pyi.1	423545	93372	93508	NM_001198914	1000	327	463	121	7	-
NM_176830	up	uc007pyi.1	up	0.6428571	0.03115079	uc007pyi.1	423545	64662	64751	NM_176830	1000	911	1000	85	4	+
NM_176830	up	uc007pyi.1	up	0.6428571	0.03115079	uc007pyi.1	423545	116221	116330	NM_176830	1000	891	1000	95	6	+
NM_176830	up	uc007pyi.1	up	0.6428571	0.03115079	uc007pyi.1	423545	207283	207370	NM_176830	1000	914	1000	82	4	+
NM_176830	up	uc007pyi.1	up	0.6428571	0.03115079	uc007pyi.1	423545	18384	18480	NM_176830	1000	904	1000	93	3	-
NM_176830	up	uc007pyi.1	up	0.6428571	0.03115079	uc007pyi.1	423545	8150	8255	NM_176830	1000	894	1000	97	8	-
NM_176830	up	uc007pyi.1	up	0.6428571	0.03115079	uc007pyi.1	423545	117911	118007	NM_176830	1000	901	1000	91	4	-
NM_176830	up	uc007pyi.1	up	0.6428571	0.03115079	uc007pyi.1	423545	198694	198784	NM_176830	1000	910	1000	84	6	-
NM_176830	up	uc007pyi.1	up	0.6428571	0.03115079	uc007pyi.1	423545	99134	99220	NM_176830	1000	914	1000	82	4	-
NM_176830	up	uc007pyi.1	up	0.6428571	0.03115079	uc007pyi.1	423545	119794	138623	NM_176830	1000	897	1000	96	7	-
NM_176830	up	uc007pyi.1	up	0.6428571	0.03115079	uc007pyi.1	423545	87170	87254	NM_176830	1000	915	1000	79	5	-
NM_176830	up	uc007pyi.1	up	0.6428571	0.03115079	uc007pyi.1	423545	214723	214806	NM_176830	1000	917	1000	77	6	-
NM_176830	up	uc007pyi.1	up	0.6428571	0.03115079	uc007pyi.1	423545	121884	121970	NM_176830	1000	915	1000	78	4	-
NM_176830	up	uc007pyi.1	up	0.6428571	0.03115079	uc007pyi.1	423545	104259	104340	NM_176830	1000	921	1000	75	4	-
NM_176830	up	uc007pyi.1	up	0.6428571	0.03115079	uc007pyi.1	423545	156730	156799	NM_176830	1000	914	983	65	4	-
NM_033264	up	uc007pyi.1	up	1	4.96E-05	uc007pyi.1	423545	188059	188094	NM_033264	1000	52	87	35	0	+
NM_009773	up	uc007pyi.1	up	0.7142857	0.0141369	uc007pyi.1	423545	295034	295064	NM_009773	1000	206	236	30	0	+
NM_009773	up	uc007pyi.1	up	0.7142857	0.0141369	uc007pyi.1	423545	5936	5966	NM_009773	1000	206	236	30	0	+
NM_009773	up	uc007pyi.1	up	0.7142857	0.0141369	uc007pyi.1	423545	225730	225761	NM_009773	1000	206	237	31	0	-
NM_009020	up	uc007pyi.1	up	0.8571429	0.001736111	uc007pyi.1	423545	174213	174250	NM_009020	1000	266	303	37	0	+
NM_009020	up	uc007pyi.1	up	0.8571429	0.001736111	uc007pyi.1	423545	10564	10596	NM_009020	1000	270	302	32	0	+
NM_009020	up	uc007pyi.1	up	0.8571429	0.001736111	uc007pyi.1	423545	215917	215970	NM_009020	1000	249	306	49	0	-
NM_009020	up	uc007pyi.1	up	0.8571429	0.001736111	uc007pyi.1	423545	301858	301919	NM_009020	1000	266	787	51	0	-
NM_009020	up	uc007pyi.1	up	0.8571429	0.001736111	uc007pyi.1	423545	35296	35338	NM_009020	1000	264	306	41	1	-
NM_009020	up	uc007pyi.1	up	0.8571429	0.001736111	uc007pyi.1	423545	278480	278521	NM_009020	1000	264	305	39	2	-
NM_009020	up	uc007pyi.1	up	0.8571429	0.001736111	uc007pyi.1	423545	361643	361679	NM_009020	1000	258	294	36	0	-
NM_009020	up	uc007pyi.1	up	0.8571429	0.001736111	uc007pyi.1	423545	330320	330358	NM_009020	1000	265	303	37	1	-
NM_009020	up	uc007pyi.1	up	0.8571429	0.001736111	uc007pyi.1	423545	332539	332579	NM_009020	1000	266	306	38	2	-
NM_009020	up	uc007pyi.1	up	0.8571429	0.001736111	uc007pyi.1	423545	174567	174610	NM_009020	1000	273	314	40	1	-
NM_009020	up	uc007pyi.1	up	0.8571429	0.001736111	uc007pyi.1	423545	298112	298146	NM_009020	1000	269	303	34	0	-
NM_009020	up	uc007pyi.1	up	0.8571429	0.001736111	uc007pyi.1	423545	118459	118494	NM_009020	1000	253	292	34	0	-
NM_001141975	up	uc007pyi.1	up	0.7857143	0.005505952	uc007pyi.1	423545	174275	174327	NM_001141975	1000	800	848	41	0	+
NM_030725	up	uc007pyi.1	up	0.7857143	0.005505952	uc007pyi.1	423545	268621	306787	NM_030725	1000	107	369	106	1	+
NM_030725	up	uc007pyi.1	up	0.7857143	0.005505952	uc007pyi.1	423545	347495	370472	NM_030725	1000	108	353	85	1	+
NM_030725	up	uc007pyi.1	up	0.7857143	0.005505952	uc007pyi.1	423545	93079	93427	NM_030725	1000	124	673	100	0	+
NM_030725	up	uc007pyi.1	up	0.7857143	0.005505952	uc007pyi.1	423545	332468	332526	NM_030725	1000	107	165	57	1	+
NM_030725	up	uc007pyi.1	up	0.7857143	0.005505952	uc007pyi.1	423545	268667	278495	NM_030725	1000	107	363	82	2	+
NM_030725	up	uc007pyi.1	up	0.7857143	0.005505952	uc007pyi.1	423545	306624	324025	NM_030725	1000	128	370	83	2	+
NM_030725	up	uc007pyi.1	up	0.7857143	0.005505952	uc007pyi.1	423545	330260	330303	NM_030725	1000	122	165	43	0	+
NM_030725	up	uc007pyi.1	up	0.7857143	0.005505952	uc007pyi.1	423545	216701	248476	NM_030725	1000	115	337	73	0	+
NM_030725	up	uc007pyi.1	up	0.7857143	0.005505952	uc007pyi.1	423545	251488	251597	NM_030725	1000	129	343	51	1	+
NM_030725	up	uc007pyi.1	up	0.7857143	0.005505952	uc007pyi.1	423545	139128	225418	NM_030725	1000	107	365	97	2	-
NM_030725	up	uc007pyi.1	up	0.7857143	0.005505952	uc007pyi.1	423545	31043	36597	NM_030725	1000	116	274	72	1	-
NM_030725	up	uc007pyi.1	up	0.7857143	0.005505952	uc007pyi.1	423545	295036	295075	NM_030725	1000	329	367	37	1	-
NM_030725	up	uc007pyi.1	up	0.7857143	0.005505952	uc007pyi.1	423545	271802	271835	NM_030725	1000	333	367	33	0	-
NM_030725	up	uc007pyi.1	up	0.7857143	0.005505952	uc007pyi.1	423545	231841	231872	NM_030725	1000	336	367	31	0	-
NM_026735	up	uc007pyi.1	up	0.9285714	0.000396825	uc007pyi.1	423545	79804	79883	NM_026735	1000	173	295	58	4	+
NM_026735	up	uc007pyi.1	up	0.9285714	0.000396825	uc007pyi.1	423545	174265	174304	NM_026735	1000	0	39	38	1	-
NM_025401	up	uc007pyi.1	up	0.7142857	0.0141369	uc007pyi.1	423545	3263	3411	NM_025401	1000	394	544	135	12	+
NM_025401	up	uc007pyi.1	up	0.7142857	0.0141369	uc007pyi.1	423545	214688	214817	NM_025401	1000	412	541	122	7	+
NM_025401	up	uc007pyi.1	up	0.7142857	0.0141369	uc007pyi.1	423545	99090	99224	NM_025401	1000	401	537	126	8	+
NM_025401	up	uc007pyi.1	up	0.7142857	0.0141369	uc007pyi.1	423545	8109	8255	NM_025401	1000	400	552	132	8	+
NM_025401	up	uc007pyi.1	up	0.7142857	0.0141369	uc007pyi.1	423545	119753	119883	NM_025401	1000	406	536	118	12	+
NM_025401	up	uc007pyi.1	up	0.7142857	0.0141369	uc007pyi.1	423545	198653	198780	NM_025401	1000	407	533	117	9	+
NM_025401	up	uc007pyi.1	up	0.7142857	0.0141369	uc007pyi.1	423545	137371	137496	NM_025401	1000	425	549	116	8	+
NM_025401	up	uc007pyi.1	up	0.7142857	0.0141369	uc007pyi.1	423545	184139	184268	NM_025401	1000	412	534	112	10	+
NM_025401	up	uc007pyi.1	up	0.7142857	0.0141369	uc007pyi.1	423545	18349	18470	NM_025401	1000	413	533	110	9	+
NM_025401	up	uc007pyi.1	up	0.7142857	0.0141369	uc007pyi.1	423545	206191	206304	NM_025401	1000	411	522	105	6	+
NM_025401	up	uc007pyi.1	up	0.7142857	0.0141369	uc007pyi.1	423545	104224	106465	NM_025401	1000	412	533	115	6	+
NM_025401	up	uc007pyi.1	up	0.7142857	0.0141369	uc007pyi.1	423545	93370	104362	NM_025401	1000	416	548	119	10	+
NM_025401	up	uc007pyi.1	up	0.7142857	0.0141369	uc007pyi.1	423545	87142	87254	NM_025401	1000	419	532	98	7	+
NM_025401	up	uc007pyi.1	up	0.7142857	0.0141369	uc007pyi.1	423545	207267	207409	NM_025401	1000	406	549	131	10	-
NM_025401	up	uc007pyi.1	up	0.7142857	0.0141369	uc007pyi.1	423545	302502	302636	NM_025401	1000	412	546	121	13	-
NM_025401	up	uc007pyi.1	up	0.7142857	0.0141369	uc007pyi.1	423545	64665	64752	NM_025401	1000	446	533	83	4	-
NM_010892	up	uc007pyi.1	up	0.6428571	0.03115079	uc007pyi.1	423545	277859	278020	NM_010892	1000	267	420	144	8	+
NM_010892	up	uc007pyi.1	up	0.6428571	0.03115079	uc007pyi.1	423545	258168	258332	NM_010892	1000	268	439	83	6	+
NM_010892	up	uc007pyi.1	up	0.6428571	0.03115079	uc007pyi.1	423545	196732	196792	NM_010892	1000	352	412	56	4	-
NM_009542	up	uc007pyi.1	up	0.6428571	0.03115079	uc007pyi.1	423545	301880	301936	NM_009542	1000	554	612	55	0	+
NM_009542	up	uc007pyi.1	up	0.6428571	0.03115079	uc007pyi.1	423545	347064	347122	NM_009542	1000	545	606	52	0	+
NM_009542	up	uc007pyi.1	up	0.6428571	0.03115079	uc007pyi.1	423545	126153	126196	NM_009542	1000	560	603	43	0	+
NM_009542	up	uc007pyi.1	up	0.6428571	0.03115079	uc007pyi.1	423545	215918	215956	NM_009542	1000	554	592	38	0	+
NM_009542	up	uc007pyi.1	up	0.6428571	0.03115079	uc007pyi.1	423545	298112	298146	NM_009542	1000	556	590	34	0	+
NM_009542	up	uc007pyi.1	up	0.6428571	0.03115079	uc007pyi.1	423545	332540	332585	NM_009542	1000	554	599	43	2	+
NM_009542	up	uc007pyi.1	up	0.6428571	0.03115079	uc007pyi.1	423545	51108	51141	NM_009542	1000	571	604	33	0	+
NM_009542	up	uc007pyi.1	up	0.6428571	0.03115079	uc007pyi.1	423545	174196	174300	NM_009542	1000	376	612	67	0	-
NM_009542	up	uc007pyi.1	up	0.6428571	0.03115079	uc007pyi.1	423545	240989	241036	NM_009542	1000	554	601	45	2	-
NM_009542	up	uc007pyi.1	up	0.6428571	0.03115079	uc007pyi.1	423545	10551	10596	NM_009542	1000	557	598	40	0	-
NM_009542	up	uc007pyi.1	up	0.6428571	0.03115079	uc007pyi.1	423545	31006	31063	NM_009542	1000	376	587	47	0	-
NM_001177659	up	uc007pyi.1	up	0.7142857	0.0141369	uc007pyi.1	423545	3269	3400	NM_001177659	1000	499	650	118	6	+
NM_001177659	up	uc007pyi.1	up	0.7142857	0.0141369	uc007pyi.1	423545	214688	214806	NM_001177659	1000	531	647	110	6	+
NM_001177659	up	uc007pyi.1	up	0.7142857	0.0141369	uc007pyi.1	423545	99100	119880	NM_001177659	1000	432	650	141	8	+
NM_001177659	up	uc007pyi.1	up	0.7142857	0.0141369	uc007pyi.1	423545	137371	137479	NM_001177659	1000	542	650	101	7	+
NM_001177659	up	uc007pyi.1	up	0.7142857	0.0141369	uc007pyi.1	423545	104224	104340	NM_001177659	1000	531	643	106	4	+
NM_001177659	up	uc007pyi.1	up	0.7142857	0.0141369	uc007pyi.1	423545	93370	93480	NM_001177659	1000	535	643	102	6	+
NM_001177659	up	uc007pyi.1	up	0.7142857	0.0141369	uc007pyi.1	423545	87137	87264	NM_001177659	1000	433	659	112	7	+
NM_001177659	up	uc007pyi.1	up	0.7142857	0.0141369	uc007pyi.1	423545	206191	206300	NM_001177659	1000	530	635	102	3	+
NM_001177659	up	uc007pyi.1	up	0.7142857	0.0141369	uc007pyi.1	423545	117884	118000	NM_001177659	1000	530	653	105	11	+
NM_001177659	up	uc007pyi.1	up	0.7142857	0.0141369	uc007pyi.1	423545	79801	99220	NM_001177659	1000	516	650	121	7	+
NM_001177659	up	uc007pyi.1	up	0.7142857	0.0141369	uc007pyi.1	423545	138497	138605	NM_001177659	1000	542	649	100	5	+
NM_001177659	up	uc007pyi.1	up	0.7142857	0.0141369	uc007pyi.1	423545	207283	302643	NM_001177659	1000	416	650	158	6	-
NM_001177659	up	uc007pyi.1	up	0.7142857	0.0141369	uc007pyi.1	423545	302515	302644	NM_001177659	1000	516	650	119	8	-
NM_001177659	up	uc007pyi.1	up	0.7142857	0.0141369	uc007pyi.1	423545	116245	116349	NM_001177659	1000	545	649	100	4	-
NM_001177659	up	uc007pyi.1	up	0.7142857	0.0141369	uc007pyi.1	423545	40913	41038	NM_001177659	1000	429	652	115	10	-
NM_001177659	up	uc007pyi.1	up	0.7142857	0.0141369	uc007pyi.1	423545	91821	91884	NM_001177659	1000	558	620	58	4	-
NM_001038499	up	uc007pyi.1	up	0.7142857	0.0141369	uc007pyi.1	423545	25177	25233	NM_001038499	1000	811	867	55	1	+
NM_001038499	up	uc007pyi.1	up	0.7142857	0.0141369	uc007pyi.1	423545	104174	104223	NM_001038499	1000	809	862	49	0	+
NM_001038499	up	uc007pyi.1	up	0.7142857	0.0141369	uc007pyi.1	423545	14864	14921	NM_001038499	1000	823	880	57	0	-
NM_001038499	up	uc007pyi.1	up	0.7142857	0.0141369	uc007pyi.1	423545	271780	271836	NM_001038499	1000	823	880	56	0	-
NM_001038499	up	uc007pyi.1	up	0.7142857	0.0141369	uc007pyi.1	423545	227582	227636	NM_001038499	1000	828	882	53	1	-
NM_001038499	up	uc007pyi.1	up	0.7142857	0.0141369	uc007pyi.1	423545	139125	139178	NM_001038499	1000	830	883	52	1	-
NM_001038499	up	uc007pyi.1	up	0.7142857	0.0141369	uc007pyi.1	423545	107343	151200	NM_001038499	1000	810	896	78	0	-
NM_001038499	up	uc007pyi.1	up	0.7142857	0.0141369	uc007pyi.1	423545	231831	256517	NM_001038499	1000	823	882	58	1	-
NM_001033266	up	uc007pyi.1	up	1	4.96E-05	uc007pyi.1	423545	278458	278515	NM_001033266	1000	204	261	54	3	+
NM_001033266	up	uc007pyi.1	up	1	4.96E-05	uc007pyi.1	423545	319996	379973	NM_001033266	1000	201	262	52	0	+
NM_001033266	up	uc007pyi.1	up	1	4.96E-05	uc007pyi.1	423545	36456	36548	NM_001033266	1000	201	272	66	0	-
NM_001033266	up	uc007pyi.1	up	1	4.96E-05	uc007pyi.1	423545	10562	10620	NM_001033266	1000	201	263	56	1	-
NM_001033266	up	uc007pyi.1	up	1	4.96E-05	uc007pyi.1	423545	271786	271843	NM_001033266	1000	196	261	56	0	-
NM_001033266	up	uc007pyi.1	up	1	4.96E-05	uc007pyi.1	423545	300689	300734	NM_001033266	1000	218	263	44	1	-
NM_001033266	up	uc007pyi.1	up	1	4.96E-05	uc007pyi.1	423545	139128	139170	NM_001033266	1000	201	243	42	0	-
NM_001033266	up	uc007pyi.1	up	1	4.96E-05	uc007pyi.1	423545	394768	394811	NM_001033266	1000	219	262	42	1	-
NM_001033266	up	uc007pyi.1	up	1	4.96E-05	uc007pyi.1	423545	231833	231872	NM_001033266	1000	214	253	39	0	-
NM_001033266	up	uc007pyi.1	up	1	4.96E-05	uc007pyi.1	423545	227595	227636	NM_001033266	1000	221	262	40	1	-
NM_001033266	up	uc007pyi.1	up	1	4.96E-05	uc007pyi.1	423545	256341	256377	NM_001033266	1000	226	262	36	0	-
NM_001033266	up	uc007pyi.1	up	1	4.96E-05	uc007pyi.1	423545	280167	280217	NM_001033266	1000	222	264	41	0	-
NM_001033266	up	uc007pyi.1	up	1	4.96E-05	uc007pyi.1	423545	274698	274730	NM_001033266	1000	231	263	32	0	-
NM_001033266	up	uc007pyi.1	up	1	4.96E-05	uc007pyi.1	423545	174289	174320	NM_001033266	1000	224	255	31	0	-
NM_001013749	up	uc007pyi.1	up	0.8571429	0.001736111	uc007pyi.1	423545	118459	118503	NM_001013749	1000	152	226	44	0	+
NM_001013749	up	uc007pyi.1	up	0.8571429	0.001736111	uc007pyi.1	423545	10572	10619	NM_001013749	1000	151	228	46	1	-
NM_001013749	up	uc007pyi.1	up	0.8571429	0.001736111	uc007pyi.1	423545	227584	227623	NM_001013749	1000	151	220	39	0	-
NM_009890	up	uc007pyi.1	up	0.8571429	0.001736111	uc007pyi.1	423545	227582	227632	NM_009890	1000	54	104	49	1	-
NM_009890	up	uc007pyi.1	up	0.8571429	0.001736111	uc007pyi.1	423545	107351	107398	NM_009890	1000	60	107	47	0	-
NM_009890	up	uc007pyi.1	up	0.8571429	0.001736111	uc007pyi.1	423545	240988	241039	NM_009890	1000	54	103	47	1	-
NM_009890	up	uc007pyi.1	up	0.8571429	0.001736111	uc007pyi.1	423545	298190	298237	NM_009890	1000	59	104	44	0	-
NM_009890	up	uc007pyi.1	up	0.8571429	0.001736111	uc007pyi.1	423545	256479	256517	NM_009890	1000	53	91	38	0	-
NM_023716	up	uc007pyi.1	up	0.7142857	0.0141369	uc007pyi.1	423545	310573	347868	NM_023716	1000	667	731	60	4	-
NM_009052	up	uc007pyi.1	up	0.7142857	0.0141369	uc007pyi.1	423545	344326	344364	NM_009052	1000	223	260	37	0	-
NM_178619	up	uc009aox.1	up	0.6428571	0.03115079	uc009aox.1	6464	5855	5891	NM_178619	1000	86	121	34	0	+
NM_011496	up	ENSMUST00000133648	up	0.7142857	0.0141369	ENSMUST00000133648	24771	10842	10935	NM_011496	1000	797	890	88	5	+
NM_001198914	up	ENSMUST00000133648	up	0.7142857	0.0141369	ENSMUST00000133648	24771	3340	3469	NM_001198914	1000	329	457	119	9	+
NM_001198914	up	ENSMUST00000133648	up	0.7142857	0.0141369	ENSMUST00000133648	24771	10829	10961	NM_001198914	1000	337	469	122	10	-
NM_001198914	up	ENSMUST00000133648	up	0.7142857	0.0141369	ENSMUST00000133648	24771	13886	13978	NM_001198914	1000	336	429	83	7	-
NM_024184	up	uc007shm.1	up	0.6428571	0.03115079	uc007shm.1	90773	52783	52923	NM_024184	1000	224	364	126	14	+
NM_024184	up	uc007shm.1	up	0.6428571	0.03115079	uc007shm.1	90773	45382	45499	NM_024184	1000	243	360	106	11	+
NM_024184	up	uc007shm.1	up	0.6428571	0.03115079	uc007shm.1	90773	46146	72784	NM_024184	1000	181	355	78	3	-
NM_001177659	up	uc007shm.1	up	0.7857143	0.005505952	uc007shm.1	90773	56019	56137	NM_001177659	1000	431	648	110	6	+
NM_009020	up	uc007shm.1	up	0.6428571	0.03115079	uc007shm.1	90773	59900	59953	NM_009020	1000	254	305	47	2	+
NM_009020	up	uc007shm.1	up	0.6428571	0.03115079	uc007shm.1	90773	60524	60556	NM_009020	1000	265	297	31	1	+
NM_001141975	up	uc007shm.1	up	0.7142857	0.0141369	uc007shm.1	90773	7179	7234	NM_001141975	1000	1	56	51	4	+
NM_018883	up	uc007shm.1	up	0.6428571	0.03115079	uc007shm.1	90773	52783	52885	NM_018883	1000	213	315	94	8	-
NM_018883	up	uc007shm.1	up	0.6428571	0.03115079	uc007shm.1	90773	56019	56113	NM_018883	1000	222	316	85	9	-
NM_030725	up	uc007shm.1	up	0.7142857	0.0141369	uc007shm.1	90773	47388	59773	NM_030725	1000	249	367	68	2	-
NM_026280	up	uc007shm.1	up	0.7857143	0.005505952	uc007shm.1	90773	17334	17386	NM_026280	1000	39	110	51	1	-
NM_026280	up	uc007shm.1	up	0.7857143	0.005505952	uc007shm.1	90773	60497	60557	NM_026280	1000	68	110	42	0	-
NM_001033266	up	uc007shm.1	up	0.7857143	0.005505952	uc007shm.1	90773	47378	47425	NM_001033266	1000	208	255	46	1	-
NM_001033266	up	uc007shm.1	up	0.7857143	0.005505952	uc007shm.1	90773	60521	60560	NM_001033266	1000	226	265	38	1	-
NM_001013749	up	uc007shm.1	up	0.9285714	0.000396825	uc007shm.1	90773	59926	59976	NM_001013749	1000	167	228	44	1	-
NM_001013749	up	uc007shm.1	up	0.9285714	0.000396825	uc007shm.1	90773	6899	6939	NM_001013749	1000	151	221	40	0	-
NM_199196	up	uc008pdk.1	up	0.6428571	0.03115079	uc008pdk.1	90825	34182	34257	NM_199196	1000	583	658	68	7	+
NM_172403	up	uc008pdk.1	up	0.7142857	0.0141369	uc008pdk.1	90825	78884	78923	NM_172403	1000	351	390	39	0	+
NM_199017	up	uc008pdk.1	up	0.6428571	0.03115079	uc008pdk.1	90825	34193	34263	NM_199017	1000	911	981	66	4	-
NM_080853	up	uc008pdk.1	up	0.7857143	0.005505952	uc008pdk.1	90825	9591	9632	NM_080853	1000	837	878	41	0	-
NM_030725	up	uc009jkd.1	up	0.7142857	0.0141369	uc009jkd.1	4302	3438	3482	NM_030725	1000	122	166	43	1	+
NM_199017	up	uc009hiz.1	up	0.6428571	0.03115079	uc009hiz.1	18773	9128	9166	NM_199017	1000	911	949	37	1	+
NM_001141975	up	uc009hiz.1	up	0.6428571	0.03115079	uc009hiz.1	18773	8964	9021	NM_001141975	1000	0	57	55	2	+
NM_011496	up	uc009hiz.1	up	0.7142857	0.0141369	uc009hiz.1	18773	8155	8278	NM_011496	1000	797	921	116	7	+
NM_011496	up	uc009hiz.1	up	0.7142857	0.0141369	uc009hiz.1	18773	15796	15870	NM_011496	1000	523	615	73	0	-
NM_001113213	up	uc009hiz.1	up	0.6428571	0.03115079	uc009hiz.1	18773	8132	8266	NM_001113213	1000	416	653	129	4	+
NM_144813	up	uc009hiz.1	up	0.6428571	0.03115079	uc009hiz.1	18773	8006	8243	NM_144813	1000	100	980	156	11	-
NM_133435	up	uc009hiz.1	up	0.6428571	0.03115079	uc009hiz.1	18773	16644	16679	NM_133435	1000	703	741	34	0	-
NM_016879	up	ENSMUST00000167528	up	0.7857143	0.005505952	ENSMUST00000167528	48053	21615	21801	NM_016879	1000	495	665	145	7	+
NM_016879	up	ENSMUST00000167528	up	0.7857143	0.005505952	ENSMUST00000167528	48053	38867	38958	NM_016879	1000	529	621	88	3	+
NM_133991	up	ENSMUST00000167528	up	0.6428571	0.03115079	ENSMUST00000167528	48053	11257	11313	NM_133991	1000	649	705	52	3	+
NM_133991	up	ENSMUST00000167528	up	0.6428571	0.03115079	ENSMUST00000167528	48053	20116	21797	NM_133991	1000	32	285	203	10	-
NM_178619	up	ENSMUST00000167528	up	0.6428571	0.03115079	ENSMUST00000167528	48053	5331	28038	NM_178619	1000	622	967	211	15	+
NM_178619	up	ENSMUST00000167528	up	0.6428571	0.03115079	ENSMUST00000167528	48053	5333	5445	NM_178619	1000	853	967	101	11	+
NM_178619	up	ENSMUST00000167528	up	0.6428571	0.03115079	ENSMUST00000167528	48053	7483	10791	NM_178619	1000	611	971	225	15	-
NM_178619	up	ENSMUST00000167528	up	0.6428571	0.03115079	ENSMUST00000167528	48053	10649	19939	NM_178619	1000	608	982	203	13	-
NM_178619	up	ENSMUST00000167528	up	0.6428571	0.03115079	ENSMUST00000167528	48053	19805	19939	NM_178619	1000	822	965	120	6	-
NM_178619	up	ENSMUST00000167528	up	0.6428571	0.03115079	ENSMUST00000167528	48053	597	656	NM_178619	1000	866	925	59	0	-
NM_025401	up	ENSMUST00000167528	up	0.7142857	0.0141369	ENSMUST00000167528	48053	27911	28036	NM_025401	1000	412	537	111	7	+
NM_025401	up	ENSMUST00000167528	up	0.7142857	0.0141369	ENSMUST00000167528	48053	423	10806	NM_025401	1000	400	703	154	10	-
NM_025401	up	ENSMUST00000167528	up	0.7142857	0.0141369	ENSMUST00000167528	48053	7490	7614	NM_025401	1000	412	536	112	12	-
NM_025401	up	ENSMUST00000167528	up	0.7142857	0.0141369	ENSMUST00000167528	48053	596	656	NM_025401	1000	438	498	57	3	-
NM_001177659	up	ENSMUST00000167528	up	0.7142857	0.0141369	ENSMUST00000167528	48053	27894	28017	NM_001177659	1000	504	635	120	1	+
NM_001177659	up	ENSMUST00000167528	up	0.7142857	0.0141369	ENSMUST00000167528	48053	5331	5440	NM_001177659	1000	442	649	93	7	+
NM_001177659	up	ENSMUST00000167528	up	0.7142857	0.0141369	ENSMUST00000167528	48053	19809	19917	NM_001177659	1000	542	650	101	7	-
NM_001177659	up	ENSMUST00000167528	up	0.7142857	0.0141369	ENSMUST00000167528	48053	562	656	NM_001177659	1000	555	650	89	4	-
NM_001177659	up	ENSMUST00000167528	up	0.7142857	0.0141369	ENSMUST00000167528	48053	10671	10776	NM_001177659	1000	544	649	93	3	-
NM_001184706	up	ENSMUST00000167528	up	0.7142857	0.0141369	ENSMUST00000167528	48053	20115	20304	NM_001184706	1000	343	525	167	8	-
NM_001184706	up	ENSMUST00000167528	up	0.7142857	0.0141369	ENSMUST00000167528	48053	38824	39000	NM_001184706	1000	346	508	114	6	-
NM_030725	up	ENSMUST00000130391	up	0.7142857	0.0141369	ENSMUST00000130391	23225	15101	15179	NM_030725	1000	107	165	57	1	+
NM_016879	up	ENSMUST00000130391	up	0.7142857	0.0141369	ENSMUST00000130391	23225	8663	8829	NM_016879	1000	491	658	141	8	+
NM_016879	up	ENSMUST00000130391	up	0.7142857	0.0141369	ENSMUST00000130391	23225	21793	21940	NM_016879	1000	512	658	126	6	+
NM_001184706	up	ENSMUST00000130391	up	0.6428571	0.03115079	ENSMUST00000130391	23225	2373	2442	NM_001184706	1000	406	459	51	1	+
NM_178619	up	BB636144	up	0.7857143	0.005505952	BB636144	7006	5804	5909	NM_178619	1000	618	723	99	6	+
NM_178619	up	BB636144	up	0.7857143	0.005505952	BB636144	7006	2229	2367	NM_178619	1000	841	977	125	6	+
NM_178619	up	BB636144	up	0.7857143	0.005505952	BB636144	7006	3124	3170	NM_178619	1000	677	723	44	2	+
NM_024184	up	BB636144	up	0.7142857	0.0141369	BB636144	7006	2229	2368	NM_024184	1000	221	361	130	9	+
NM_024184	up	BB636144	up	0.7142857	0.0141369	BB636144	7006	5803	5935	NM_024184	1000	228	360	124	8	+
NM_024184	up	BB636144	up	0.7142857	0.0141369	BB636144	7006	257	328	NM_024184	1000	284	361	64	7	+
NM_024184	up	BB636144	up	0.7142857	0.0141369	BB636144	7006	447	519	NM_024184	1000	274	344	61	4	+
NM_011496	up	BB636144	up	0.8571429	0.001736111	BB636144	7006	5810	5935	NM_011496	1000	797	922	113	12	+
NM_011496	up	BB636144	up	0.8571429	0.001736111	BB636144	7006	2247	2368	NM_011496	1000	801	923	112	7	+
NM_001177659	up	BB636144	up	0.7142857	0.0141369	BB636144	7006	3040	5917	NM_001177659	1000	499	649	129	8	+
NM_001177659	up	BB636144	up	0.7142857	0.0141369	BB636144	7006	2247	2350	NM_001177659	1000	546	649	96	7	+
NM_001177659	up	BB636144	up	0.7142857	0.0141369	BB636144	7006	3072	3179	NM_001177659	1000	542	649	96	6	+
NM_001113213	up	BB636144	up	0.7857143	0.005505952	BB636144	7006	3040	5917	NM_001113213	1000	499	649	129	8	+
NM_001113213	up	BB636144	up	0.7857143	0.005505952	BB636144	7006	2247	2350	NM_001113213	1000	546	649	96	7	+
NM_001113213	up	BB636144	up	0.7857143	0.005505952	BB636144	7006	3072	3179	NM_001113213	1000	542	649	96	6	+
NM_177619	up	BB636144	up	0.7142857	0.0141369	BB636144	7006	2228	2367	NM_177619	1000	318	457	130	9	-
NM_176830	up	BB636144	up	0.7857143	0.005505952	BB636144	7006	2265	2350	NM_176830	1000	915	1000	81	4	-
NM_176830	up	BB636144	up	0.7857143	0.005505952	BB636144	7006	3094	3179	NM_176830	1000	915	1000	76	4	-
NM_175933	up	BB636144	up	0.7142857	0.0141369	BB636144	7006	2230	2367	NM_175933	1000	840	978	127	9	-
NM_144813	up	BB636144	up	0.7857143	0.005505952	BB636144	7006	2228	2332	NM_144813	1000	99	203	100	4	-
NM_144813	up	BB636144	up	0.7857143	0.005505952	BB636144	7006	3045	3162	NM_144813	1000	97	216	106	6	-
NM_144813	up	BB636144	up	0.7857143	0.005505952	BB636144	7006	3729	3808	NM_144813	1000	921	1000	77	2	-
NM_199196	up	uc007rum.1	up	0.7142857	0.0141369	uc007rum.1	28323	10356	10427	NM_199196	1000	894	965	68	3	+
NM_199196	up	uc007rum.1	up	0.7142857	0.0141369	uc007rum.1	28323	15530	15599	NM_199196	1000	756	965	64	5	+
NM_199196	up	uc007rum.1	up	0.7142857	0.0141369	uc007rum.1	28323	28143	28247	NM_199196	1000	575	865	65	5	-
NM_178619	up	uc007rum.1	up	0.7142857	0.0141369	uc007rum.1	28323	15520	17603	NM_178619	1000	605	981	203	13	+
NM_178619	up	uc007rum.1	up	0.7142857	0.0141369	uc007rum.1	28323	10337	10498	NM_178619	1000	827	981	148	5	+
NM_178619	up	uc007rum.1	up	0.7142857	0.0141369	uc007rum.1	28323	15507	15613	NM_178619	1000	816	925	84	4	+
NM_027519	up	uc007rum.1	up	0.9285714	0.000396825	uc007rum.1	28323	7601	7976	NM_027519	1000	249	624	356	17	+
NM_177619	up	uc007rum.1	up	0.6428571	0.03115079	uc007rum.1	28323	10349	10476	NM_177619	1000	335	462	118	9	-
NM_177619	up	uc007rum.1	up	0.6428571	0.03115079	uc007rum.1	28323	17456	17582	NM_177619	1000	335	463	116	10	-
NM_024184	up	uc008sbe.1	up	0.6428571	0.03115079	uc008sbe.1	16881	12426	12554	NM_024184	1000	213	342	111	7	+
NM_024184	up	uc008sbe.1	up	0.6428571	0.03115079	uc008sbe.1	16881	6710	6839	NM_024184	1000	229	359	120	9	-
NM_175933	up	uc008sbe.1	up	0.7857143	0.005505952	uc008sbe.1	16881	6714	6839	NM_175933	1000	845	970	113	12	+
NM_144813	up	uc008sbe.1	up	0.7142857	0.0141369	uc008sbe.1	16881	6744	6839	NM_144813	1000	99	194	89	6	+
NM_144813	up	uc008sbe.1	up	0.7142857	0.0141369	uc008sbe.1	16881	1941	12459	NM_144813	1000	177	1000	130	5	-
NM_133991	up	uc008sbe.1	up	0.7142857	0.0141369	uc008sbe.1	16881	6781	6839	NM_133991	1000	671	729	53	5	+
NM_001198914	up	uc008sbe.1	up	0.6428571	0.03115079	uc008sbe.1	16881	6714	6839	NM_001198914	1000	337	462	117	8	+
NM_001198914	up	uc008sbe.1	up	0.6428571	0.03115079	uc008sbe.1	16881	12422	12554	NM_001198914	1000	349	484	118	7	-
NM_178619	up	uc008sbe.1	up	0.7142857	0.0141369	uc008sbe.1	16881	1441	1534	NM_178619	1000	873	983	79	4	+
NM_178619	up	uc008sbe.1	up	0.7142857	0.0141369	uc008sbe.1	16881	6714	6833	NM_178619	1000	853	972	113	6	-
NM_025401	up	uc008sbe.1	up	0.6428571	0.03115079	uc008sbe.1	16881	6714	6839	NM_025401	1000	419	544	115	10	-
NM_001177659	up	uc008sbe.1	up	0.7857143	0.005505952	uc008sbe.1	16881	6744	6833	NM_001177659	1000	542	631	85	4	-
NM_001113213	up	uc008sbe.1	up	0.8571429	0.001736111	uc008sbe.1	16881	6744	6833	NM_001113213	1000	542	631	85	4	-
NM_176830	up	uc008sbe.1	up	0.7142857	0.0141369	uc008sbe.1	16881	12469	12554	NM_176830	1000	915	1000	78	7	-
NM_025674	up	uc008sbe.1	up	0.7857143	0.005505952	uc008sbe.1	16881	1467	2037	NM_025674	1000	368	858	172	14	-
NM_176830	up	NR_015478	up	0.6428571	0.03115079	NR_015478	64500	30540	30646	NM_176830	1000	893	1000	101	5	+
NM_176830	up	NR_015478	up	0.6428571	0.03115079	NR_015478	64500	39102	39186	NM_176830	1000	916	1000	79	5	+
NM_176830	up	NR_015478	up	0.6428571	0.03115079	NR_015478	64500	43869	43954	NM_176830	1000	915	1000	77	8	+
NM_176830	up	NR_015478	up	0.6428571	0.03115079	NR_015478	64500	22329	22367	NM_176830	1000	957	996	36	1	+
NM_176830	up	NR_015478	up	0.6428571	0.03115079	NR_015478	64500	57552	57657	NM_176830	1000	894	1000	97	8	-
NM_176830	up	NR_015478	up	0.6428571	0.03115079	NR_015478	64500	16528	16614	NM_176830	1000	914	1000	82	4	-
NM_176830	up	NR_015478	up	0.6428571	0.03115079	NR_015478	64500	26002	26086	NM_176830	1000	915	1000	74	3	-
NM_176830	up	NR_015478	up	0.6428571	0.03115079	NR_015478	64500	33979	34030	NM_176830	1000	695	972	49	1	-
NM_018883	up	NR_015478	up	0.8571429	0.001736111	NR_015478	64500	24082	24194	NM_018883	1000	223	356	101	5	+
NM_018883	up	NR_015478	up	0.8571429	0.001736111	NR_015478	64500	43905	43997	NM_018883	1000	233	324	85	5	+
NM_018883	up	NR_015478	up	0.8571429	0.001736111	NR_015478	64500	22329	22399	NM_018883	1000	239	311	67	2	+
NM_018883	up	NR_015478	up	0.8571429	0.001736111	NR_015478	64500	47516	47571	NM_018883	1000	43	287	51	4	+
NM_018883	up	NR_015478	up	0.8571429	0.001736111	NR_015478	64500	16448	16595	NM_018883	1000	215	356	120	6	-
NM_018883	up	NR_015478	up	0.8571429	0.001736111	NR_015478	64500	32447	32517	NM_018883	1000	444	514	66	4	-
NM_018883	up	NR_015478	up	0.8571429	0.001736111	NR_015478	64500	45805	45899	NM_018883	1000	430	524	85	9	-
NM_133991	up	NR_015478	up	0.7857143	0.005505952	NR_015478	64500	42730	42950	NM_133991	1000	67	301	197	7	+
NM_133991	up	NR_015478	up	0.7857143	0.005505952	NR_015478	64500	52250	52445	NM_133991	1000	59	252	181	9	+
NM_133991	up	NR_015478	up	0.7857143	0.005505952	NR_015478	64500	45805	45979	NM_133991	1000	69	249	152	11	+
NM_178619	up	uc007ypf.1	up	0.7857143	0.005505952	uc007ypf.1	7591	1463	1621	NM_178619	1000	816	981	147	6	+
NM_025401	up	uc007ypf.1	up	0.7142857	0.0141369	uc007ypf.1	7591	1473	1620	NM_025401	1000	406	552	135	11	+
NM_011496	up	uc007ypf.1	up	0.7142857	0.0141369	uc007ypf.1	7591	1492	1611	NM_011496	1000	797	916	111	6	+
NM_001177659	up	uc007ypf.1	up	0.7142857	0.0141369	uc007ypf.1	7591	1478	1599	NM_001177659	1000	430	649	111	5	+
NM_001113213	up	uc007ypf.1	up	0.7857143	0.005505952	uc007ypf.1	7591	1478	1599	NM_001113213	1000	430	649	111	5	+
NM_176830	up	uc007ypf.1	up	0.6428571	0.03115079	uc007ypf.1	7591	1514	1599	NM_176830	1000	915	1000	81	4	-
NM_175933	up	uc007ypf.1	up	0.7142857	0.0141369	uc007ypf.1	7591	1461	1611	NM_175933	1000	845	994	137	10	-
NM_144813	up	uc007ypf.1	up	0.6428571	0.03115079	uc007ypf.1	7591	1464	1581	NM_144813	1000	99	220	114	2	-
NM_178619	up	ENSMUST00000022049	up	0.6428571	0.03115079	ENSMUST00000022049	10026	2446	2478	NM_178619	1000	113	145	32	0	+
NM_178619	up	ENSMUST00000155292	up	0.8571429	0.001736111	ENSMUST00000155292	11225	4017	4053	NM_178619	1000	101	137	35	1	-
NM_144813	up	ENSMUST00000145208	up	0.6428571	0.03115079	ENSMUST00000145208	7224	5318	5419	NM_144813	1000	101	202	97	4	+
NM_144813	up	ENSMUST00000145208	up	0.6428571	0.03115079	ENSMUST00000145208	7224	2702	2761	NM_144813	1000	150	209	56	3	+
NM_199196	up	ENSMUST00000145208	up	0.7857143	0.005505952	ENSMUST00000145208	7224	5347	5435	NM_199196	1000	882	965	81	2	-
NM_199196	up	ENSMUST00000145208	up	0.7857143	0.005505952	ENSMUST00000145208	7224	5999	6082	NM_199196	1000	880	965	76	6	-
NM_199196	up	ENSMUST00000145208	up	0.7857143	0.005505952	ENSMUST00000145208	7224	2681	2741	NM_199196	1000	766	965	58	1	-
NM_178619	up	ENSMUST00000145208	up	0.7857143	0.005505952	ENSMUST00000145208	7224	2627	6077	NM_178619	1000	605	965	237	14	-
NM_178619	up	ENSMUST00000145208	up	0.7857143	0.005505952	ENSMUST00000145208	7224	5930	6093	NM_178619	1000	817	981	140	11	-
NM_178619	up	ENSMUST00000145208	up	0.7857143	0.005505952	ENSMUST00000145208	7224	2702	2740	NM_178619	1000	853	891	36	2	-
NM_001113213	up	ENSMUST00000145208	up	0.6428571	0.03115079	ENSMUST00000145208	7224	5941	6094	NM_001113213	1000	506	659	136	10	-
NM_001113213	up	ENSMUST00000145208	up	0.6428571	0.03115079	ENSMUST00000145208	7224	2632	2770	NM_001113213	1000	508	649	129	5	-
NM_001113213	up	ENSMUST00000145208	up	0.6428571	0.03115079	ENSMUST00000145208	7224	5318	5448	NM_001113213	1000	508	629	111	4	-
NM_027519	up	AK019438	up	0.7857143	0.005505952	AK019438	20762	11303	11667	NM_027519	1000	258	624	345	19	+
NM_027519	up	AK019438	up	0.7857143	0.005505952	AK019438	20762	12797	13166	NM_027519	1000	265	624	321	22	+
NM_025674	up	AK019438	up	0.6428571	0.03115079	AK019438	20762	17835	17890	NM_025674	1000	655	710	52	3	-
NM_025401	up	uc008hlm.1	up	0.8571429	0.001736111	uc008hlm.1	8798	2325	2467	NM_025401	1000	399	545	123	10	+
NM_001198914	up	uc008hlm.1	up	0.7142857	0.0141369	uc008hlm.1	8798	2327	2467	NM_001198914	1000	336	474	117	4	-
NM_199017	up	AK013651	up	0.7857143	0.005505952	AK013651	13055	7550	7595	NM_199017	1000	936	981	44	1	+
NM_009743	up	AK013651	up	0.7142857	0.0141369	AK013651	13055	7740	7852	NM_009743	1000	652	767	73	5	+
NM_178619	up	NR_015488	up	0.7142857	0.0141369	NR_015488	7708	1463	1621	NM_178619	1000	816	981	147	6	+
NM_025401	up	NR_015488	up	0.6428571	0.03115079	NR_015488	7708	1473	1620	NM_025401	1000	406	552	135	11	+
NM_024184	up	NR_015488	up	0.6428571	0.03115079	NR_015488	7708	1478	1611	NM_024184	1000	221	354	124	9	+
NM_011496	up	NR_015488	up	0.6428571	0.03115079	NR_015488	7708	1492	1611	NM_011496	1000	797	916	111	6	+
NM_001177659	up	NR_015488	up	0.7857143	0.005505952	NR_015488	7708	1478	1599	NM_001177659	1000	430	649	111	5	+
NM_001113213	up	NR_015488	up	0.7142857	0.0141369	NR_015488	7708	1478	1599	NM_001113213	1000	430	649	111	5	+
NM_176830	up	NR_015488	up	0.7142857	0.0141369	NR_015488	7708	1514	1599	NM_176830	1000	915	1000	81	4	-
NM_175933	up	NR_015488	up	0.6428571	0.03115079	NR_015488	7708	1461	1611	NM_175933	1000	845	994	137	10	-
NM_018883	up	NR_015488	up	0.6428571	0.03115079	NR_015488	7708	1464	1581	NM_018883	1000	215	335	109	8	-
NM_024184	up	CA874578	up	0.6428571	0.03115079	CA874578	101780	35969	36110	NM_024184	1000	219	363	131	10	+
NM_024184	up	CA874578	up	0.6428571	0.03115079	CA874578	101780	36601	36736	NM_024184	1000	222	360	121	9	-
NM_024184	up	CA874578	up	0.6428571	0.03115079	CA874578	101780	47293	47413	NM_024184	1000	219	360	112	8	-
NM_001177659	up	CA874578	up	0.6428571	0.03115079	CA874578	101780	35967	36090	NM_001177659	1000	530	650	112	8	+
NM_001177659	up	CA874578	up	0.6428571	0.03115079	CA874578	101780	36617	36743	NM_001177659	1000	416	650	115	6	-
NM_001177659	up	CA874578	up	0.6428571	0.03115079	CA874578	101780	47309	47405	NM_001177659	1000	554	650	89	7	-
NM_080853	up	CA874578	up	0.7142857	0.0141369	CA874578	101780	69935	69967	NM_080853	1000	837	869	32	0	+
NM_080853	up	CA874578	up	0.7142857	0.0141369	CA874578	101780	100049	100094	NM_080853	1000	813	858	43	2	-
NM_178619	up	ENSMUST00000124940	up	0.7857143	0.005505952	ENSMUST00000124940	5678	2146	2307	NM_178619	1000	824	973	139	4	+
NM_011496	up	ENSMUST00000124940	up	0.7142857	0.0141369	ENSMUST00000124940	5678	2187	2311	NM_011496	1000	797	921	115	9	+
NM_001113213	up	ENSMUST00000124940	up	0.6428571	0.03115079	ENSMUST00000124940	5678	2160	2295	NM_001113213	1000	497	650	126	7	+
NM_177619	up	ENSMUST00000124940	up	0.7142857	0.0141369	ENSMUST00000124940	5678	2167	2298	NM_177619	1000	331	462	120	11	-
NM_144813	up	ENSMUST00000124940	up	0.7857143	0.005505952	ENSMUST00000124940	5678	2161	2277	NM_144813	1000	98	215	110	5	-
NM_018883	up	ENSMUST00000141760	up	0.7142857	0.0141369	ENSMUST00000141760	9141	7770	7872	NM_018883	1000	215	317	94	8	+
NM_018883	up	ENSMUST00000141760	up	0.7142857	0.0141369	ENSMUST00000141760	9141	841	914	NM_018883	1000	223	291	66	2	+
NM_001198914	up	ENSMUST00000141760	up	0.7142857	0.0141369	ENSMUST00000141760	9141	7741	7873	NM_001198914	1000	338	470	123	9	+
NM_001198914	up	ENSMUST00000141760	up	0.7142857	0.0141369	ENSMUST00000141760	9141	855	912	NM_001198914	1000	384	441	57	0	+
NM_025401	up	ENSMUST00000141760	up	0.8571429	0.001736111	ENSMUST00000141760	9141	7748	7872	NM_025401	1000	412	536	112	12	-
NM_025401	up	ENSMUST00000141760	up	0.8571429	0.001736111	ENSMUST00000141760	9141	854	914	NM_025401	1000	438	498	57	3	-
NM_144813	up	NR_024029	up	0.8571429	0.001736111	NR_024029	11526	6271	6343	NM_144813	1000	923	995	67	5	-
NM_014194	down	AK082906	down	0.6428571	0.03115079	AK082906	2667	450	536	NM_014194	1000	83	171	72	0	-
NM_010045	down	uc007bai.1	down	0.7142857	0.0141369	uc007bai.1	9373	5747	5782	NM_010045	1000	943	979	35	0	+
NM_010045	down	uc007bai.1	down	0.7142857	0.0141369	uc007bai.1	9373	7667	7702	NM_010045	1000	930	965	35	0	-
NM_010045	down	uc007bai.1	down	0.7142857	0.0141369	uc007bai.1	9373	676	717	NM_010045	1000	757	794	36	0	-
NM_001013373	down	uc007bai.1	down	0.6428571	0.03115079	uc007bai.1	9373	6289	6365	NM_001013373	1000	556	634	71	5	+
NM_001013373	down	uc007bai.1	down	0.6428571	0.03115079	uc007bai.1	9373	6011	6103	NM_001013373	1000	551	661	51	1	-
NM_198860	down	NR_003718	down	0.6428571	0.03115079	NR_003718	15722	5829	5876	NM_198860	1000	644	695	43	4	+
NM_033073	down	NR_003718	down	0.6428571	0.03115079	NR_003718	15722	1912	1947	NM_033073	1000	486	521	35	0	+
NM_013521	down	NR_003718	down	0.7142857	0.0141369	NR_003718	15722	1901	1946	NM_013521	1000	940	985	45	0	+
NM_009932	down	NR_003718	down	0.6428571	0.03115079	NR_003718	15722	7902	15229	NM_009932	1000	94	337	53	1	+
NM_177182	down	NR_003718	down	0.7142857	0.0141369	NR_003718	15722	6437	6516	NM_177182	1000	389	470	72	7	-
NM_053190	down	NR_003718	down	0.8571429	0.001736111	NR_003718	15722	6429	6570	NM_053190	1000	220	362	129	8	-
NM_010746	down	NR_003718	down	0.6428571	0.03115079	NR_003718	15722	6414	6586	NM_010746	1000	65	222	145	9	-
NM_177182	down	ENSMUST00000137077	down	0.7142857	0.0141369	ENSMUST00000137077	3937	1803	1919	NM_177182	1000	371	470	95	1	+
NM_172603	down	ENSMUST00000137077	down	0.6428571	0.03115079	ENSMUST00000137077	3937	1793	1968	NM_172603	1000	160	333	159	9	+
NM_153590	down	ENSMUST00000137077	down	0.6428571	0.03115079	ENSMUST00000137077	3937	1817	1950	NM_153590	1000	766	890	118	5	+
NM_013653	down	ENSMUST00000137077	down	0.7142857	0.0141369	ENSMUST00000137077	3937	1827	1885	NM_013653	1000	941	1000	57	1	+
NM_013653	down	ENSMUST00000137077	down	0.7142857	0.0141369	ENSMUST00000137077	3937	1784	1950	NM_013653	1000	601	756	142	11	-
NM_010304	down	ENSMUST00000137077	down	0.7142857	0.0141369	ENSMUST00000137077	3937	1794	1942	NM_010304	1000	756	905	139	9	+
NM_009127	down	ENSMUST00000137077	down	0.6428571	0.03115079	ENSMUST00000137077	3937	1802	1950	NM_009127	1000	684	838	139	6	+
NM_001198560	down	ENSMUST00000137077	down	0.7142857	0.0141369	ENSMUST00000137077	3937	1805	1950	NM_001198560	1000	555	700	132	12	+
NM_001164327	down	ENSMUST00000137077	down	0.6428571	0.03115079	ENSMUST00000137077	3937	1798	1943	NM_001164327	1000	109	287	136	9	+
NM_001163550	down	ENSMUST00000137077	down	0.6428571	0.03115079	ENSMUST00000137077	3937	1784	1950	NM_001163550	1000	582	730	142	5	+
NM_029658	down	ENSMUST00000137077	down	0.7857143	0.005505952	ENSMUST00000137077	3937	1806	1951	NM_029658	1000	771	917	133	12	-
NM_027283	down	ENSMUST00000137077	down	0.8571429	0.001736111	ENSMUST00000137077	3937	1804	1947	NM_027283	1000	307	454	133	10	-
NM_025355	down	ENSMUST00000137077	down	0.6428571	0.03115079	ENSMUST00000137077	3937	1809	1950	NM_025355	1000	562	705	131	8	-
NM_008670	down	ENSMUST00000137077	down	0.8571429	0.001736111	ENSMUST00000137077	3937	1805	1952	NM_008670	1000	664	811	135	10	-
NM_001081069	down	ENSMUST00000137077	down	0.7142857	0.0141369	ENSMUST00000137077	3937	1784	1940	NM_001081069	1000	319	468	139	6	-
NM_010746	down	ENSMUST00000128800	down	0.7142857	0.0141369	ENSMUST00000128800	1677	1107	1267	NM_010746	1000	40	203	128	5	-
NM_031247	down	MM9LINCRNAEXON10080-	down	0.6428571	0.03115079	MM9LINCRNAEXON10080-	439	142	186	NM_031247	1000	261	305	44	0	-
NM_172442	down	NR_027851	down	0.6428571	0.03115079	NR_027851	2034	1687	1742	NM_172442	1000	413	450	37	0	+
NM_028013	down	NR_027851	down	0.6428571	0.03115079	NR_027851	2034	1670	1712	NM_028013	1000	557	599	41	1	+
NM_028013	down	NR_027851	down	0.6428571	0.03115079	NR_027851	2034	1731	1794	NM_028013	1000	554	599	45	0	+
NM_028013	down	NR_027851	down	0.6428571	0.03115079	NR_027851	2034	1691	1754	NM_028013	1000	554	599	45	0	+
NM_027321	down	NR_027851	down	0.6428571	0.03115079	NR_027851	2034	1669	1710	NM_027321	1000	235	276	40	1	+
NM_027321	down	NR_027851	down	0.6428571	0.03115079	NR_027851	2034	1727	1791	NM_027321	1000	235	281	46	0	+
NM_027321	down	NR_027851	down	0.6428571	0.03115079	NR_027851	2034	1586	1690	NM_027321	1000	232	282	50	0	+
NM_027321	down	NR_027851	down	0.6428571	0.03115079	NR_027851	2034	1449	1482	NM_027321	1000	249	282	32	1	+
NM_023788	down	NR_027851	down	0.7142857	0.0141369	NR_027851	2034	1449	1483	NM_023788	1000	839	873	33	1	+
NM_023788	down	NR_027851	down	0.7142857	0.0141369	NR_027851	2034	1635	1691	NM_023788	1000	835	873	38	0	+
NM_018752	down	NR_027851	down	0.6428571	0.03115079	NR_027851	2034	1455	1712	NM_018752	1000	70	882	78	0	+
NM_013521	down	NR_027851	down	0.6428571	0.03115079	NR_027851	2034	1451	1502	NM_013521	1000	936	984	46	1	+
NM_009378	down	NR_027851	down	0.7857143	0.005505952	NR_027851	2034	1455	1485	NM_009378	1000	694	724	30	0	+
NM_008461	down	NR_027851	down	0.7857143	0.005505952	NR_027851	2034	1984	2021	NM_008461	1000	464	501	35	2	+
NM_008090	down	NR_027851	down	0.7857143	0.005505952	NR_027851	2034	1640	1704	NM_008090	1000	601	647	45	1	+
NM_001164423	down	NR_027851	down	0.7142857	0.0141369	NR_027851	2034	1671	1711	NM_001164423	1000	574	614	39	1	+
NM_001083957	down	NR_027851	down	0.7142857	0.0141369	NR_027851	2034	1455	1710	NM_001083957	1000	559	658	92	3	+
NM_001083957	down	NR_027851	down	0.7142857	0.0141369	NR_027851	2034	1728	1792	NM_001083957	1000	584	632	46	1	+
NM_001083957	down	NR_027851	down	0.7142857	0.0141369	NR_027851	2034	1449	1488	NM_001083957	1000	603	640	35	1	+
NM_145133	down	NR_027851	down	0.6428571	0.03115079	NR_027851	2034	1727	1792	NM_145133	1000	288	335	47	0	-
NM_027788	down	NR_027851	down	0.7857143	0.005505952	NR_027851	2034	1632	1690	NM_027788	1000	153	193	40	0	-
NM_027788	down	NR_027851	down	0.7857143	0.005505952	NR_027851	2034	1449	1482	NM_027788	1000	153	186	32	1	-
NM_011658	down	NR_027851	down	0.7857143	0.005505952	NR_027851	2034	1677	1739	NM_011658	1000	685	731	44	1	-
NM_011658	down	NR_027851	down	0.7857143	0.005505952	NR_027851	2034	1632	1690	NM_011658	1000	684	724	39	1	-
NM_011616	down	NR_027851	down	0.7857143	0.005505952	NR_027851	2034	1454	1710	NM_011616	1000	197	279	79	2	-
NM_011616	down	NR_027851	down	0.7857143	0.005505952	NR_027851	2034	1456	1507	NM_011616	1000	195	243	46	1	-
NM_007974	down	NR_027851	down	0.7857143	0.005505952	NR_027851	2034	1727	1792	NM_007974	1000	243	290	47	0	-
NM_007974	down	NR_027851	down	0.7857143	0.005505952	NR_027851	2034	1589	1652	NM_007974	1000	245	290	43	1	-
NM_007974	down	NR_027851	down	0.7857143	0.005505952	NR_027851	2034	1524	1612	NM_007974	1000	239	290	49	1	-
NM_001033978	down	NR_027851	down	0.7857143	0.005505952	NR_027851	2034	1675	1752	NM_001033978	1000	115	174	58	1	-
NM_001033978	down	NR_027851	down	0.7857143	0.005505952	NR_027851	2034	1558	1652	NM_001033978	1000	115	174	57	1	-
NM_182806	down	AK046787	down	0.7857143	0.005505952	AK046787	2556	0	65	NM_182806	1000	395	463	60	5	+
NM_172921	down	AK046787	down	0.6428571	0.03115079	AK046787	2556	15	65	NM_172921	1000	522	572	46	4	+
NM_172921	down	AK046787	down	0.6428571	0.03115079	AK046787	2556	596	681	NM_172921	1000	556	623	62	2	-
NM_153590	down	AK046787	down	0.7142857	0.0141369	AK046787	2556	22	65	NM_153590	1000	766	809	41	2	+
NM_028125	down	AK046787	down	0.7857143	0.005505952	AK046787	2556	582	732	NM_028125	1000	802	957	134	12	+
NM_028125	down	AK046787	down	0.7857143	0.005505952	AK046787	2556	0	65	NM_028125	1000	885	953	63	2	-
NM_025355	down	AK046787	down	0.8571429	0.001736111	AK046787	2556	596	720	NM_025355	1000	583	707	114	10	+
NM_025355	down	AK046787	down	0.8571429	0.001736111	AK046787	2556	9	79	NM_025355	1000	556	708	66	2	-
NM_019738	down	AK046787	down	0.8571429	0.001736111	AK046787	2556	909	1072	NM_019738	1000	801	963	145	12	+
NM_013653	down	AK046787	down	0.6428571	0.03115079	AK046787	2556	0	65	NM_013653	1000	898	974	63	2	+
NM_013653	down	AK046787	down	0.6428571	0.03115079	AK046787	2556	0	62	NM_013653	1000	694	758	60	2	-
NM_010304	down	AK046787	down	0.7857143	0.005505952	AK046787	2556	0	62	NM_010304	1000	758	819	56	4	+
NM_001198560	down	AK046787	down	0.6428571	0.03115079	AK046787	2556	25	65	NM_001198560	1000	569	609	38	2	+
NM_001081069	down	AK046787	down	0.6428571	0.03115079	AK046787	2556	596	708	NM_001081069	1000	331	443	107	5	+
NM_001081069	down	AK046787	down	0.6428571	0.03115079	AK046787	2556	0	65	NM_001081069	1000	400	468	63	2	-
NM_177182	down	AK046787	down	0.6428571	0.03115079	AK046787	2556	605	687	NM_177182	1000	388	470	79	3	-
NM_001038839	down	AK046787	down	0.7142857	0.0141369	AK046787	2556	0	65	NM_001038839	1000	835	899	63	0	-
NM_009799	down	ENSMUST00000138201	down	0.7142857	0.0141369	ENSMUST00000138201	3167	2902	2954	NM_009799	1000	571	625	52	0	-
NM_001081069	down	AK038804	down	0.8571429	0.001736111	AK038804	80919	76017	76139	NM_001081069	1000	330	452	118	4	+
NM_001081069	down	AK038804	down	0.8571429	0.001736111	AK038804	80919	52463	52889	NM_001081069	1000	131	471	165	7	-
NM_028125	down	AK038804	down	0.7142857	0.0141369	AK038804	80919	72197	76136	NM_028125	1000	792	934	134	7	+
NM_028125	down	AK038804	down	0.7142857	0.0141369	AK038804	80919	72249	72337	NM_028125	1000	851	940	85	3	+
NM_027283	down	AK038804	down	0.7142857	0.0141369	AK038804	80919	75999	76140	NM_027283	1000	307	448	126	10	+
NM_027283	down	AK038804	down	0.7142857	0.0141369	AK038804	80919	52484	52566	NM_027283	1000	363	445	75	7	-
NM_025355	down	AK038804	down	0.7857143	0.005505952	AK038804	80919	72198	76140	NM_025355	1000	561	706	134	9	+
NM_025355	down	AK038804	down	0.7857143	0.005505952	AK038804	80919	72249	72333	NM_025355	1000	618	703	77	6	+
NM_008670	down	AK038804	down	0.7142857	0.0141369	AK038804	80919	76016	76137	NM_008670	1000	685	806	115	6	+
NM_008670	down	AK038804	down	0.7142857	0.0141369	AK038804	80919	72249	72334	NM_008670	1000	722	807	78	7	+
NM_008670	down	AK038804	down	0.7142857	0.0141369	AK038804	80919	52479	52624	NM_008670	1000	666	811	134	11	-
NM_001001446	down	AK038804	down	0.7857143	0.005505952	AK038804	80919	75996	76140	NM_001001446	1000	843	1000	132	12	+
NM_001001446	down	AK038804	down	0.7857143	0.005505952	AK038804	80919	72198	72332	NM_001001446	1000	842	996	125	9	+
NM_001001446	down	AK038804	down	0.7857143	0.005505952	AK038804	80919	52485	52624	NM_001001446	1000	843	996	124	9	-
NM_001001446	down	AK038804	down	0.7857143	0.005505952	AK038804	80919	9185	9339	NM_001001446	1000	238	374	114	10	-
NM_182806	down	AK038804	down	0.7142857	0.0141369	AK038804	80919	52471	76070	NM_182806	1000	398	1000	177	12	+
NM_182806	down	AK038804	down	0.7142857	0.0141369	AK038804	80919	75999	76148	NM_182806	1000	401	556	140	6	-
NM_182806	down	AK038804	down	0.7142857	0.0141369	AK038804	80919	72216	72333	NM_182806	1000	413	541	113	4	-
NM_177182	down	AK038804	down	0.7142857	0.0141369	AK038804	80919	52461	52594	NM_177182	1000	359	470	105	5	+
NM_177182	down	AK038804	down	0.7142857	0.0141369	AK038804	80919	72229	72349	NM_177182	1000	362	470	99	2	-
NM_177182	down	AK038804	down	0.7142857	0.0141369	AK038804	80919	76027	76137	NM_177182	1000	377	470	89	4	-
NM_172603	down	AK038804	down	0.7857143	0.005505952	AK038804	80919	52477	52617	NM_172603	1000	169	309	129	11	+
NM_172603	down	AK038804	down	0.7857143	0.005505952	AK038804	80919	76016	76144	NM_172603	1000	165	297	116	4	-
NM_172603	down	AK038804	down	0.7857143	0.005505952	AK038804	80919	72249	72323	NM_172603	1000	186	260	71	3	-
NM_023124	down	AK038804	down	0.7142857	0.0141369	AK038804	80919	52509	52580	NM_023124	1000	142	213	66	5	+
NM_023124	down	AK038804	down	0.7142857	0.0141369	AK038804	80919	76016	76113	NM_023124	1000	141	250	93	4	-
NM_023124	down	AK038804	down	0.7142857	0.0141369	AK038804	80919	72249	72309	NM_023124	1000	141	201	56	4	-
NM_010746	down	AK038804	down	0.6428571	0.03115079	AK038804	80919	52463	52624	NM_010746	1000	78	229	140	10	+
NM_010746	down	AK038804	down	0.6428571	0.03115079	AK038804	80919	76044	76127	NM_010746	1000	99	182	81	2	-
NM_009127	down	AK038804	down	0.7857143	0.005505952	AK038804	80919	52496	52730	NM_009127	1000	710	853	127	11	+
NM_009127	down	AK038804	down	0.7857143	0.005505952	AK038804	80919	72242	72333	NM_009127	1000	693	789	85	2	-
NM_031247	down	AK038804	down	0.8571429	0.001736111	AK038804	80919	36487	36555	NM_031247	1000	236	302	65	1	+
NM_031247	down	AK038804	down	0.8571429	0.001736111	AK038804	80919	52898	52949	NM_031247	1000	251	302	51	0	+
NM_001166376	down	AK038804	down	0.8571429	0.001736111	AK038804	80919	18595	19144	NM_001166376	1000	153	704	527	22	+
NM_001166376	down	AK038804	down	0.8571429	0.001736111	AK038804	80919	45760	45969	NM_001166376	1000	153	363	197	11	-
NM_001164329	down	AK038804	down	0.7857143	0.005505952	AK038804	80919	71993	72044	NM_001164329	1000	224	618	41	0	+
NM_029658	down	AK038804	down	0.7857143	0.005505952	AK038804	80919	76015	76138	NM_029658	1000	791	914	116	7	+
NM_029658	down	AK038804	down	0.7857143	0.005505952	AK038804	80919	72199	72356	NM_029658	1000	772	950	142	11	+
NM_028013	down	AK038804	down	0.7142857	0.0141369	AK038804	80919	45390	45437	NM_028013	1000	552	597	44	0	+
NM_023788	down	AK038804	down	0.7857143	0.005505952	AK038804	80919	45431	45486	NM_023788	1000	840	943	45	1	+
NM_013653	down	AK038804	down	0.8571429	0.001736111	AK038804	80919	72198	76137	NM_013653	1000	600	741	133	8	+
NM_013653	down	AK038804	down	0.8571429	0.001736111	AK038804	80919	72242	72334	NM_013653	1000	650	742	87	5	+
NM_013653	down	AK038804	down	0.8571429	0.001736111	AK038804	80919	52501	52560	NM_013653	1000	941	1000	57	2	+
NM_013653	down	AK038804	down	0.8571429	0.001736111	AK038804	80919	52463	52635	NM_013653	1000	592	759	155	10	-
NM_013653	down	AK038804	down	0.8571429	0.001736111	AK038804	80919	76061	76120	NM_013653	1000	941	1000	57	2	-
NM_010780	down	AK038804	down	0.6428571	0.03115079	AK038804	80919	18375	18412	NM_010780	1000	322	359	37	0	+
NM_010780	down	AK038804	down	0.6428571	0.03115079	AK038804	80919	13967	14002	NM_010780	1000	334	374	35	0	+
NM_010391	down	AK038804	down	0.9285714	0.000396825	AK038804	80919	71982	72026	NM_010391	1000	0	49	40	1	+
NM_010391	down	AK038804	down	0.9285714	0.000396825	AK038804	80919	13566	13598	NM_010391	1000	18	50	32	0	-
NM_009932	down	AK038804	down	0.7857143	0.005505952	AK038804	80919	45392	45611	NM_009932	1000	27	290	150	2	+
NM_009932	down	AK038804	down	0.7857143	0.005505952	AK038804	80919	71931	72044	NM_009932	1000	26	179	92	0	+
NM_009932	down	AK038804	down	0.7857143	0.005505952	AK038804	80919	71949	72045	NM_009932	1000	26	215	67	0	+
NM_009932	down	AK038804	down	0.7857143	0.005505952	AK038804	80919	71927	72003	NM_009932	1000	77	180	57	0	+
NM_009932	down	AK038804	down	0.7857143	0.005505952	AK038804	80919	45457	45539	NM_009932	1000	69	140	50	1	+
NM_009932	down	AK038804	down	0.7857143	0.005505952	AK038804	80919	71993	72040	NM_009932	1000	26	74	42	0	+
NM_009932	down	AK038804	down	0.7857143	0.005505952	AK038804	80919	67161	67199	NM_009932	1000	26	69	38	0	-
NM_008632	down	AK038804	down	0.7142857	0.0141369	AK038804	80919	45385	45457	NM_008632	1000	49	121	68	1	+
NM_001164423	down	AK038804	down	0.6428571	0.03115079	AK038804	80919	45388	45428	NM_001164423	1000	570	610	40	0	+
NM_001164423	down	AK038804	down	0.6428571	0.03115079	AK038804	80919	67163	67205	NM_001164423	1000	571	613	42	0	-
NM_001163550	down	AK038804	down	0.6428571	0.03115079	AK038804	80919	52463	52624	NM_001163550	1000	579	730	143	8	+
NM_001163550	down	AK038804	down	0.6428571	0.03115079	AK038804	80919	72198	76137	NM_001163550	1000	597	731	131	3	-
NM_001163550	down	AK038804	down	0.6428571	0.03115079	AK038804	80919	72220	72334	NM_001163550	1000	596	716	110	4	-
NM_146717	down	AK038804	down	0.7857143	0.005505952	AK038804	80919	21389	21500	NM_146717	1000	256	362	102	0	+
NM_146717	down	AK038804	down	0.7857143	0.005505952	AK038804	80919	9082	9174	NM_146717	1000	288	382	86	2	+
NM_146717	down	AK038804	down	0.7857143	0.005505952	AK038804	80919	9117	9182	NM_146717	1000	242	361	63	1	+
NM_019738	down	AK038804	down	0.7857143	0.005505952	AK038804	80919	9185	9336	NM_019738	1000	813	963	138	12	+
NM_001164327	down	AK038804	down	0.7857143	0.005505952	AK038804	80919	52476	52586	NM_001164327	1000	153	255	96	6	+
NM_001164327	down	AK038804	down	0.7857143	0.005505952	AK038804	80919	76016	76148	NM_001164327	1000	105	274	122	5	-
NM_001164327	down	AK038804	down	0.7857143	0.005505952	AK038804	80919	72242	72323	NM_001164327	1000	163	244	76	5	-
NM_133203	down	AK038804	down	0.7142857	0.0141369	AK038804	80919	76594	76666	NM_133203	1000	732	810	72	0	+
NM_027788	down	AK038804	down	0.7142857	0.0141369	AK038804	80919	67162	67204	NM_027788	1000	160	202	42	0	+
NM_027788	down	AK038804	down	0.7142857	0.0141369	AK038804	80919	45390	45617	NM_027788	1000	149	202	53	0	-
NM_023122	down	AK038804	down	0.7142857	0.0141369	AK038804	80919	73817	73858	NM_023122	1000	754	813	40	1	+
NM_023122	down	AK038804	down	0.7142857	0.0141369	AK038804	80919	18372	18407	NM_023122	1000	780	815	35	0	-
NM_021718	down	AK038804	down	0.6428571	0.03115079	AK038804	80919	18400	18482	NM_021718	1000	87	181	69	1	+
NM_011616	down	AK038804	down	0.8571429	0.001736111	AK038804	80919	76593	76666	NM_011616	1000	103	190	72	0	+
NM_011616	down	AK038804	down	0.8571429	0.001736111	AK038804	80919	71934	72034	NM_011616	1000	192	278	79	2	-
NM_011616	down	AK038804	down	0.8571429	0.001736111	AK038804	80919	45404	45551	NM_011616	1000	191	278	84	2	-
NM_011616	down	AK038804	down	0.8571429	0.001736111	AK038804	80919	71958	72044	NM_011616	1000	204	278	70	4	-
NM_011616	down	AK038804	down	0.8571429	0.001736111	AK038804	80919	18375	36554	NM_011616	1000	172	254	59	1	-
NM_011616	down	AK038804	down	0.8571429	0.001736111	AK038804	80919	45481	45526	NM_011616	1000	232	275	42	0	-
NM_011616	down	AK038804	down	0.8571429	0.001736111	AK038804	80919	72013	72044	NM_011616	1000	234	265	31	0	-
NM_008125	down	AK038804	down	0.6428571	0.03115079	AK038804	80919	53593	72049	NM_008125	1000	672	738	64	1	+
NM_008125	down	AK038804	down	0.6428571	0.03115079	AK038804	80919	45525	45558	NM_008125	1000	697	730	32	1	+
NM_008125	down	AK038804	down	0.6428571	0.03115079	AK038804	80919	45477	45514	NM_008125	1000	697	732	34	0	+
NM_008125	down	AK038804	down	0.6428571	0.03115079	AK038804	80919	45431	45463	NM_008125	1000	703	735	31	1	+
NM_001177959	down	AK038804	down	0.7857143	0.005505952	AK038804	80919	73817	73858	NM_001177959	1000	754	813	40	1	+
NM_001177959	down	AK038804	down	0.7857143	0.005505952	AK038804	80919	18372	18407	NM_001177959	1000	780	815	35	0	-
NM_001038839	down	AK038804	down	0.6428571	0.03115079	AK038804	80919	76017	76146	NM_001038839	1000	765	894	122	7	+
NM_001038839	down	AK038804	down	0.6428571	0.03115079	AK038804	80919	72249	72333	NM_001038839	1000	801	885	78	6	+
NM_001038839	down	AK038804	down	0.6428571	0.03115079	AK038804	80919	29675	52616	NM_001038839	1000	753	942	170	9	-
NM_001164202	down	AK038804	down	0.7142857	0.0141369	AK038804	80919	49983	50025	NM_001164202	1000	784	826	40	2	-
NM_009910	down	AK038804	down	0.7142857	0.0141369	AK038804	80919	36514	36554	NM_009910	1000	672	712	39	1	-
NM_153590	down	AK038804	down	0.9285714	0.000396825	AK038804	80919	72187	72326	NM_153590	1000	766	902	125	10	-
NM_153590	down	AK038804	down	0.9285714	0.000396825	AK038804	80919	75996	76130	NM_153590	1000	766	890	115	9	-
NM_144847	down	AK038804	down	0.7857143	0.005505952	AK038804	80919	72262	72315	NM_144847	1000	138	191	50	3	-
NM_008461	down	AK038804	down	0.7142857	0.0141369	AK038804	80919	76015	76082	NM_008461	1000	436	503	62	5	-
NM_001198560	down	AK038804	down	0.8571429	0.001736111	AK038804	80919	72197	72349	NM_001198560	1000	543	702	137	11	-
NM_198860	down	AK038804	down	0.6428571	0.03115079	AK038804	80919	3619	3712	NM_198860	1000	643	766	85	6	-
NM_198860	down	AK038804	down	0.6428571	0.03115079	AK038804	80919	53606	76666	NM_198860	1000	659	870	79	3	-
NM_011658	down	AK038804	down	0.8571429	0.001736111	AK038804	80919	45390	45440	NM_011658	1000	687	733	45	0	-
NM_010194	down	AK038804	down	0.7857143	0.005505952	AK038804	80919	71974	72010	NM_010194	1000	636	672	34	2	-
NM_001025577	down	AK038804	down	0.7142857	0.0141369	AK038804	80919	45392	46659	NM_001025577	1000	275	347	71	0	-
NM_001025577	down	AK038804	down	0.7142857	0.0141369	AK038804	80919	71944	71996	NM_001025577	1000	301	353	49	3	-
NM_001025577	down	AK038804	down	0.7142857	0.0141369	AK038804	80919	71969	72016	NM_001025577	1000	305	352	44	3	-
NM_153590	down	NR_028123	down	0.7142857	0.0141369	NR_028123	4332	2198	2322	NM_153590	1000	766	890	109	5	+
NM_013653	down	NR_028123	down	0.6428571	0.03115079	NR_028123	4332	2220	2258	NM_013653	1000	962	1000	38	0	+
NM_013653	down	NR_028123	down	0.6428571	0.03115079	NR_028123	4332	2161	2324	NM_013653	1000	599	768	141	8	-
NM_007974	down	NR_028123	down	0.6428571	0.03115079	NR_028123	4332	2263	2299	NM_007974	1000	690	726	35	1	+
NM_028125	down	NR_028123	down	0.6428571	0.03115079	NR_028123	4332	2166	2349	NM_028125	1000	777	957	152	9	-
NM_001081069	down	NR_028123	down	0.6428571	0.03115079	NR_028123	4332	2162	2309	NM_001081069	1000	325	479	137	3	-
NM_177182	down	ENSMUST00000110693	down	0.6428571	0.03115079	ENSMUST00000110693	4491	3493	3559	NM_177182	1000	395	470	41	1	+
NM_014194	down	ENSMUST00000110693	down	0.8571429	0.001736111	ENSMUST00000110693	4491	3369	3453	NM_014194	1000	62	174	78	4	+
NM_014194	down	ENSMUST00000110693	down	0.8571429	0.001736111	ENSMUST00000110693	4491	3377	3437	NM_014194	1000	162	221	59	0	+
NM_014194	down	ENSMUST00000110693	down	0.8571429	0.001736111	ENSMUST00000110693	4491	3360	3435	NM_014194	1000	658	733	73	2	-
NM_013753	down	ENSMUST00000110693	down	0.6428571	0.03115079	ENSMUST00000110693	4491	2994	3181	NM_013753	1000	505	691	176	10	-
NM_001035531	down	ENSMUST00000110693	down	0.6428571	0.03115079	ENSMUST00000110693	4491	3360	3455	NM_001035531	1000	1	112	93	2	-
NM_001035531	down	ENSMUST00000110693	down	0.6428571	0.03115079	ENSMUST00000110693	4491	3380	3454	NM_001035531	1000	15	164	74	0	-
NM_172603	down	NR_033332	down	0.7142857	0.0141369	NR_033332	73769	27223	44570	NM_172603	1000	126	309	140	8	+
NM_172603	down	NR_033332	down	0.7142857	0.0141369	NR_033332	73769	24680	25195	NM_172603	1000	189	292	98	5	+
NM_172603	down	NR_033332	down	0.7142857	0.0141369	NR_033332	73769	42462	42609	NM_172603	1000	169	316	139	8	-
NM_172603	down	NR_033332	down	0.7142857	0.0141369	NR_033332	73769	13985	14123	NM_172603	1000	165	300	127	8	-
NM_172603	down	NR_033332	down	0.7142857	0.0141369	NR_033332	73769	71557	72128	NM_172603	1000	190	316	122	4	-
NM_172603	down	NR_033332	down	0.7142857	0.0141369	NR_033332	73769	43881	44001	NM_172603	1000	186	306	110	10	-
NM_172603	down	NR_033332	down	0.7142857	0.0141369	NR_033332	73769	28716	28822	NM_172603	1000	186	292	101	5	-
NM_172603	down	NR_033332	down	0.7142857	0.0141369	NR_033332	73769	52117	52225	NM_172603	1000	190	300	102	5	-
NM_153590	down	NR_033332	down	0.7142857	0.0141369	NR_033332	73769	44442	44570	NM_153590	1000	766	882	111	5	+
NM_153590	down	NR_033332	down	0.7142857	0.0141369	NR_033332	73769	24674	24774	NM_153590	1000	766	856	84	6	+
NM_153590	down	NR_033332	down	0.7142857	0.0141369	NR_033332	73769	13968	14102	NM_153590	1000	766	890	114	6	-
NM_153590	down	NR_033332	down	0.7142857	0.0141369	NR_033332	73769	42465	42595	NM_153590	1000	766	887	112	8	-
NM_153590	down	NR_033332	down	0.7142857	0.0141369	NR_033332	73769	10281	10395	NM_153590	1000	766	870	98	6	-
NM_153590	down	NR_033332	down	0.7142857	0.0141369	NR_033332	73769	52111	52232	NM_153590	1000	766	879	103	7	-
NM_153590	down	NR_033332	down	0.7142857	0.0141369	NR_033332	73769	28716	28825	NM_153590	1000	766	865	95	4	-
NM_153590	down	NR_033332	down	0.7142857	0.0141369	NR_033332	73769	72006	72135	NM_153590	1000	766	887	107	5	-
NM_153590	down	NR_033332	down	0.7142857	0.0141369	NR_033332	73769	43891	44005	NM_153590	1000	765	869	96	8	-
NM_030682	down	NR_033332	down	0.7857143	0.005505952	NR_033332	73769	24620	34164	NM_030682	1000	199	528	85	1	+
NM_009127	down	NR_033332	down	0.7142857	0.0141369	NR_033332	73769	24682	24774	NM_009127	1000	713	805	87	5	+
NM_009127	down	NR_033332	down	0.7142857	0.0141369	NR_033332	73769	72006	72157	NM_009127	1000	683	835	141	1	-
NM_009127	down	NR_033332	down	0.7142857	0.0141369	NR_033332	73769	42465	42613	NM_009127	1000	683	835	136	8	-
NM_009127	down	NR_033332	down	0.7142857	0.0141369	NR_033332	73769	71554	71695	NM_009127	1000	680	841	131	9	-
NM_009127	down	NR_033332	down	0.7142857	0.0141369	NR_033332	73769	10277	28847	NM_009127	1000	676	823	131	7	-
NM_009127	down	NR_033332	down	0.7142857	0.0141369	NR_033332	73769	50561	50655	NM_009127	1000	713	807	86	8	-
NM_001164327	down	NR_033332	down	0.7142857	0.0141369	NR_033332	73769	44442	44570	NM_001164327	1000	160	286	117	9	+
NM_001164327	down	NR_033332	down	0.7142857	0.0141369	NR_033332	73769	24680	24775	NM_001164327	1000	166	261	90	5	+
NM_001164327	down	NR_033332	down	0.7142857	0.0141369	NR_033332	73769	42462	42627	NM_001164327	1000	131	293	145	6	-
NM_001164327	down	NR_033332	down	0.7142857	0.0141369	NR_033332	73769	71557	71692	NM_001164327	1000	136	293	127	8	-
NM_001164327	down	NR_033332	down	0.7142857	0.0141369	NR_033332	73769	13985	14109	NM_001164327	1000	153	277	116	8	-
NM_001164327	down	NR_033332	down	0.7142857	0.0141369	NR_033332	73769	52117	52225	NM_001164327	1000	167	277	99	8	-
NM_001164327	down	NR_033332	down	0.7142857	0.0141369	NR_033332	73769	28571	28822	NM_001164327	1000	163	257	89	5	-
NM_177078	down	NR_033332	down	0.7857143	0.005505952	NR_033332	73769	42464	42538	NM_177078	1000	925	1000	67	7	+
NM_177078	down	NR_033332	down	0.7857143	0.005505952	NR_033332	73769	50528	50598	NM_177078	1000	925	992	60	0	+
NM_177078	down	NR_033332	down	0.7857143	0.005505952	NR_033332	73769	24731	24774	NM_177078	1000	957	1000	41	2	-
NM_053190	down	NR_033332	down	0.6428571	0.03115079	NR_033332	73769	44416	44569	NM_053190	1000	219	376	144	5	+
NM_053190	down	NR_033332	down	0.6428571	0.03115079	NR_033332	73769	24645	25195	NM_053190	1000	221	360	132	4	+
NM_053190	down	NR_033332	down	0.6428571	0.03115079	NR_033332	73769	42461	42625	NM_053190	1000	220	385	152	12	-
NM_053190	down	NR_033332	down	0.6428571	0.03115079	NR_033332	73769	13977	28855	NM_053190	1000	219	376	149	7	-
NM_053190	down	NR_033332	down	0.6428571	0.03115079	NR_033332	73769	71556	72158	NM_053190	1000	233	385	146	6	-
NM_053190	down	NR_033332	down	0.6428571	0.03115079	NR_033332	73769	43881	44031	NM_053190	1000	228	374	135	11	-
NM_053190	down	NR_033332	down	0.6428571	0.03115079	NR_033332	73769	10281	10424	NM_053190	1000	225	365	134	6	-
NM_053190	down	NR_033332	down	0.6428571	0.03115079	NR_033332	73769	30802	30945	NM_053190	1000	244	386	132	10	-
NM_053190	down	NR_033332	down	0.6428571	0.03115079	NR_033332	73769	52120	52244	NM_053190	1000	244	365	112	6	-
NM_053190	down	NR_033332	down	0.6428571	0.03115079	NR_033332	73769	28564	28831	NM_053190	1000	245	355	105	5	-
NM_053190	down	NR_033332	down	0.6428571	0.03115079	NR_033332	73769	71658	71692	NM_053190	1000	239	274	33	1	-
NM_031247	down	NR_033332	down	0.7857143	0.005505952	NR_033332	73769	11753	11794	NM_031247	1000	261	302	41	0	+
NM_029658	down	NR_033332	down	0.8571429	0.001736111	NR_033332	73769	13968	14129	NM_029658	1000	772	942	144	11	+
NM_029658	down	NR_033332	down	0.8571429	0.001736111	NR_033332	73769	42465	42625	NM_029658	1000	775	961	147	12	+
NM_029658	down	NR_033332	down	0.8571429	0.001736111	NR_033332	73769	43891	44039	NM_029658	1000	793	955	132	8	+
NM_029658	down	NR_033332	down	0.8571429	0.001736111	NR_033332	73769	28716	28852	NM_029658	1000	797	942	121	6	+
NM_029658	down	NR_033332	down	0.8571429	0.001736111	NR_033332	73769	71560	72128	NM_029658	1000	775	899	114	9	+
NM_029658	down	NR_033332	down	0.8571429	0.001736111	NR_033332	73769	52120	71689	NM_029658	1000	792	914	113	9	+
NM_029658	down	NR_033332	down	0.8571429	0.001736111	NR_033332	73769	50552	50657	NM_029658	1000	795	900	95	10	+
NM_029658	down	NR_033332	down	0.8571429	0.001736111	NR_033332	73769	24636	44570	NM_029658	1000	780	956	147	10	-
NM_029658	down	NR_033332	down	0.8571429	0.001736111	NR_033332	73769	10895	24953	NM_029658	1000	780	957	137	6	-
NM_027283	down	NR_033332	down	0.9285714	0.000396825	NR_033332	73769	42461	44031	NM_027283	1000	303	464	148	12	+
NM_027283	down	NR_033332	down	0.9285714	0.000396825	NR_033332	73769	43940	44004	NM_027283	1000	374	438	61	3	+
NM_023124	down	NR_033332	down	0.6428571	0.03115079	NR_033332	73769	44369	44570	NM_023124	1000	12	262	114	3	+
NM_023124	down	NR_033332	down	0.6428571	0.03115079	NR_033332	73769	24367	24774	NM_023124	1000	13	236	100	3	+
NM_023124	down	NR_033332	down	0.6428571	0.03115079	NR_033332	73769	10947	10993	NM_023124	1000	139	185	43	3	+
NM_023124	down	NR_033332	down	0.6428571	0.03115079	NR_033332	73769	42469	42578	NM_023124	1000	141	262	101	8	-
NM_023124	down	NR_033332	down	0.6428571	0.03115079	NR_033332	73769	13976	14084	NM_023124	1000	142	262	101	4	-
NM_023124	down	NR_033332	down	0.6428571	0.03115079	NR_033332	73769	10268	10377	NM_023124	1000	142	263	99	7	-
NM_023124	down	NR_033332	down	0.6428571	0.03115079	NR_033332	73769	71576	72159	NM_023124	1000	29	250	102	3	-
NM_023124	down	NR_033332	down	0.6428571	0.03115079	NR_033332	73769	14312	28808	NM_023124	1000	141	265	103	7	-
NM_023124	down	NR_033332	down	0.6428571	0.03115079	NR_033332	73769	50534	50637	NM_023124	1000	150	262	86	7	-
NM_023124	down	NR_033332	down	0.6428571	0.03115079	NR_033332	73769	28564	43987	NM_023124	1000	141	240	86	7	-
NM_023124	down	NR_033332	down	0.6428571	0.03115079	NR_033332	73769	52120	52154	NM_023124	1000	216	250	32	2	-
NM_010746	down	NR_033332	down	0.7142857	0.0141369	NR_033332	73769	44349	44579	NM_010746	1000	22	231	191	9	+
NM_010746	down	NR_033332	down	0.7142857	0.0141369	NR_033332	73769	42469	42627	NM_010746	1000	44	219	147	8	-
NM_010746	down	NR_033332	down	0.7142857	0.0141369	NR_033332	73769	13985	14133	NM_010746	1000	42	213	134	6	-
NM_010746	down	NR_033332	down	0.7142857	0.0141369	NR_033332	73769	30812	30957	NM_010746	1000	35	219	133	9	-
NM_010746	down	NR_033332	down	0.7142857	0.0141369	NR_033332	73769	71555	71695	NM_010746	1000	43	231	130	5	-
NM_010746	down	NR_033332	down	0.7142857	0.0141369	NR_033332	73769	28716	28855	NM_010746	1000	64	205	126	8	-
NM_010746	down	NR_033332	down	0.7142857	0.0141369	NR_033332	73769	52117	52225	NM_010746	1000	103	213	101	6	-
NM_008670	down	NR_033332	down	0.9285714	0.000396825	NR_033332	73769	42469	42607	NM_008670	1000	676	811	128	7	+
NM_008670	down	NR_033332	down	0.9285714	0.000396825	NR_033332	73769	13968	14109	NM_008670	1000	666	806	129	7	+
NM_008670	down	NR_033332	down	0.9285714	0.000396825	NR_033332	73769	10269	10403	NM_008670	1000	673	807	123	11	+
NM_008670	down	NR_033332	down	0.9285714	0.000396825	NR_033332	73769	50534	50657	NM_008670	1000	676	793	110	7	+
NM_008670	down	NR_033332	down	0.9285714	0.000396825	NR_033332	73769	52117	52244	NM_008670	1000	682	806	113	9	+
NM_008670	down	NR_033332	down	0.9285714	0.000396825	NR_033332	73769	28716	28831	NM_008670	1000	690	805	105	10	+
NM_001081069	down	NR_033332	down	0.7857143	0.005505952	NR_033332	73769	42461	42625	NM_001081069	1000	309	476	154	10	+
NM_001081069	down	NR_033332	down	0.7857143	0.005505952	NR_033332	73769	71555	71690	NM_001081069	1000	308	452	132	3	+
NM_001081069	down	NR_033332	down	0.7857143	0.005505952	NR_033332	73769	10261	42626	NM_001081069	1000	310	481	153	7	+
NM_001081069	down	NR_033332	down	0.7857143	0.005505952	NR_033332	73769	28716	28856	NM_001081069	1000	334	479	129	11	+
NM_001081069	down	NR_033332	down	0.7857143	0.005505952	NR_033332	73769	13982	14110	NM_001081069	1000	325	451	121	5	+
NM_001081069	down	NR_033332	down	0.7857143	0.005505952	NR_033332	73769	30803	30946	NM_001081069	1000	309	451	126	8	+
NM_001081069	down	NR_033332	down	0.7857143	0.005505952	NR_033332	73769	43881	44011	NM_001081069	1000	320	450	118	12	+
NM_001081069	down	NR_033332	down	0.7857143	0.005505952	NR_033332	73769	72033	72179	NM_001081069	1000	341	473	123	6	+
NM_001081069	down	NR_033332	down	0.7857143	0.005505952	NR_033332	73769	50540	50657	NM_001081069	1000	325	437	102	9	+
NM_001081069	down	NR_033332	down	0.7857143	0.005505952	NR_033332	73769	44436	44568	NM_001081069	1000	319	449	123	7	-
NM_018752	down	NR_033332	down	0.7857143	0.005505952	NR_033332	73769	51303	51351	NM_018752	1000	829	885	43	2	+
NM_010780	down	NR_033332	down	0.7142857	0.0141369	NR_033332	73769	51314	51357	NM_010780	1000	331	393	43	0	+
NM_010780	down	NR_033332	down	0.7142857	0.0141369	NR_033332	73769	21784	21889	NM_010780	1000	293	393	89	4	-
NM_010652	down	NR_033332	down	0.7142857	0.0141369	NR_033332	73769	37971	38028	NM_010652	1000	715	778	56	0	+
NM_008125	down	NR_033332	down	0.8571429	0.001736111	NR_033332	73769	63505	63539	NM_008125	1000	701	735	34	0	+
NM_008090	down	NR_033332	down	0.7857143	0.005505952	NR_033332	73769	51314	51362	NM_008090	1000	601	647	45	0	+
NM_008090	down	NR_033332	down	0.7857143	0.005505952	NR_033332	73769	67285	67445	NM_008090	1000	600	647	46	0	+
NM_008090	down	NR_033332	down	0.7857143	0.005505952	NR_033332	73769	21691	21728	NM_008090	1000	606	649	37	0	-
NM_008090	down	NR_033332	down	0.7857143	0.005505952	NR_033332	73769	21846	21883	NM_008090	1000	605	648	36	1	-
NM_177691	down	NR_033332	down	0.7142857	0.0141369	NR_033332	73769	21746	21793	NM_177691	1000	699	744	44	0	+
NM_177182	down	NR_033332	down	0.6428571	0.03115079	NR_033332	73769	24653	24774	NM_177182	1000	362	467	97	3	+
NM_177182	down	NR_033332	down	0.6428571	0.03115079	NR_033332	73769	10292	10417	NM_177182	1000	362	470	103	3	-
NM_177182	down	NR_033332	down	0.6428571	0.03115079	NR_033332	73769	72033	72117	NM_177182	1000	385	469	83	1	-
NM_177182	down	NR_033332	down	0.6428571	0.03115079	NR_033332	73769	13999	28854	NM_177182	1000	361	470	102	5	-
NM_177182	down	NR_033332	down	0.6428571	0.03115079	NR_033332	73769	42492	44031	NM_177182	1000	367	470	97	6	-
NM_177182	down	NR_033332	down	0.6428571	0.03115079	NR_033332	73769	52131	52217	NM_177182	1000	384	470	80	6	-
NM_177182	down	NR_033332	down	0.6428571	0.03115079	NR_033332	73769	30835	30921	NM_177182	1000	384	470	79	7	-
NM_177182	down	NR_033332	down	0.6428571	0.03115079	NR_033332	73769	50560	50733	NM_177182	1000	361	470	87	5	-
NM_177182	down	NR_033332	down	0.6428571	0.03115079	NR_033332	73769	28730	28807	NM_177182	1000	385	462	72	5	-
NM_177182	down	NR_033332	down	0.6428571	0.03115079	NR_033332	73769	43914	43986	NM_177182	1000	385	457	66	6	-
NM_172530	down	NR_033332	down	0.9285714	0.000396825	NR_033332	73769	4370	4442	NM_172530	1000	444	722	61	0	+
NM_028013	down	NR_033332	down	0.7857143	0.005505952	NR_033332	73769	7623	7657	NM_028013	1000	565	599	34	0	+
NM_028013	down	NR_033332	down	0.7857143	0.005505952	NR_033332	73769	3484	3515	NM_028013	1000	552	583	31	0	-
NM_021718	down	NR_033332	down	0.8571429	0.001736111	NR_033332	73769	67392	67488	NM_021718	1000	82	174	83	2	+
NM_021718	down	NR_033332	down	0.8571429	0.001736111	NR_033332	73769	67294	67369	NM_021718	1000	87	171	68	1	+
NM_021718	down	NR_033332	down	0.8571429	0.001736111	NR_033332	73769	67410	67487	NM_021718	1000	79	170	59	0	-
NM_021718	down	NR_033332	down	0.8571429	0.001736111	NR_033332	73769	67313	67368	NM_021718	1000	114	167	39	0	-
NM_013753	down	NR_033332	down	0.7857143	0.005505952	NR_033332	73769	11377	11571	NM_013753	1000	495	691	185	7	+
NM_013753	down	NR_033332	down	0.7857143	0.005505952	NR_033332	73769	33773	33954	NM_013753	1000	505	691	166	15	+
NM_013753	down	NR_033332	down	0.7857143	0.005505952	NR_033332	73769	24381	24559	NM_013753	1000	505	691	163	14	+
NM_013653	down	NR_033332	down	0.7857143	0.005505952	NR_033332	73769	42469	44511	NM_013653	1000	608	1000	233	16	+
NM_013653	down	NR_033332	down	0.7857143	0.005505952	NR_033332	73769	13967	24743	NM_013653	1000	600	1000	177	12	+
NM_013653	down	NR_033332	down	0.7857143	0.005505952	NR_033332	73769	43891	44433	NM_013653	1000	621	890	147	11	+
NM_013653	down	NR_033332	down	0.7857143	0.005505952	NR_033332	73769	71564	72179	NM_013653	1000	608	763	145	8	+
NM_013653	down	NR_033332	down	0.7857143	0.005505952	NR_033332	73769	28601	28856	NM_013653	1000	665	767	94	6	+
NM_013653	down	NR_033332	down	0.7857143	0.005505952	NR_033332	73769	14033	24774	NM_013653	1000	634	1000	166	10	-
NM_013653	down	NR_033332	down	0.7857143	0.005505952	NR_033332	73769	72066	72125	NM_013653	1000	941	1000	57	2	-
NM_013653	down	NR_033332	down	0.7857143	0.005505952	NR_033332	73769	30869	30928	NM_013653	1000	941	1000	57	2	-
NM_013653	down	NR_033332	down	0.7857143	0.005505952	NR_033332	73769	52165	52218	NM_013653	1000	947	1000	53	0	-
NM_013653	down	NR_033332	down	0.7857143	0.005505952	NR_033332	73769	42526	42608	NM_013653	1000	886	1000	66	5	-
NM_013653	down	NR_033332	down	0.7857143	0.005505952	NR_033332	73769	43940	43994	NM_013653	1000	941	995	52	2	-
NM_013653	down	NR_033332	down	0.7857143	0.005505952	NR_033332	73769	50594	50653	NM_013653	1000	941	1000	54	5	-
NM_013560	down	NR_033332	down	0.9285714	0.000396825	NR_033332	73769	12415	12567	NM_013560	1000	179	335	108	4	+
NM_013560	down	NR_033332	down	0.9285714	0.000396825	NR_033332	73769	66671	66753	NM_013560	1000	157	239	75	7	+
NM_013560	down	NR_033332	down	0.9285714	0.000396825	NR_033332	73769	2966	3031	NM_013560	1000	171	236	62	3	+
NM_013560	down	NR_033332	down	0.9285714	0.000396825	NR_033332	73769	27219	27371	NM_013560	1000	167	324	125	11	-
NM_011616	down	NR_033332	down	0.7857143	0.005505952	NR_033332	73769	21727	21838	NM_011616	1000	169	276	96	3	+
NM_011616	down	NR_033332	down	0.7857143	0.005505952	NR_033332	73769	53985	67448	NM_011616	1000	196	279	81	2	-
NM_009378	down	NR_033332	down	0.6428571	0.03115079	NR_033332	73769	51315	51351	NM_009378	1000	694	732	36	0	+
NM_007974	down	NR_033332	down	0.7857143	0.005505952	NR_033332	73769	21692	21768	NM_007974	1000	238	293	54	0	+
NM_007974	down	NR_033332	down	0.7857143	0.005505952	NR_033332	73769	51313	51364	NM_007974	1000	239	290	49	2	-
NM_001025577	down	NR_033332	down	0.6428571	0.03115079	NR_033332	73769	21834	21885	NM_001025577	1000	311	365	48	3	+
NM_001025577	down	NR_033332	down	0.6428571	0.03115079	NR_033332	73769	21788	21839	NM_001025577	1000	311	354	40	2	+
NM_172921	down	NR_033332	down	0.7857143	0.005505952	NR_033332	73769	10276	10423	NM_172921	1000	503	630	111	6	-
NM_001166376	down	NR_033332	down	0.7857143	0.005505952	NR_033332	73769	26672	27209	NM_001166376	1000	166	704	520	17	-
NM_027217	down	NR_033332	down	0.9285714	0.000396825	NR_033332	73769	44343	44379	NM_027217	1000	607	643	36	0	-
NM_001101471	down	NR_033332	down	0.6428571	0.03115079	NR_033332	73769	43936	43988	NM_001101471	1000	432	484	47	5	-
NM_145133	down	NR_033332	down	0.7857143	0.005505952	NR_033332	73769	51313	51367	NM_145133	1000	281	335	52	2	-
NM_027788	down	NR_033332	down	0.6428571	0.03115079	NR_033332	73769	51315	51371	NM_027788	1000	150	210	54	2	-
NM_011852	down	NR_033332	down	0.8571429	0.001736111	NR_033332	73769	51314	51347	NM_011852	1000	36	69	33	0	-
NM_011658	down	NR_033332	down	0.6428571	0.03115079	NR_033332	73769	35444	35479	NM_011658	1000	696	731	35	0	-
NM_010766	down	NR_033332	down	0.6428571	0.03115079	NR_033332	73769	37996	38029	NM_010766	1000	791	824	33	0	-
NM_010194	down	NR_033332	down	0.8571429	0.001736111	NR_033332	73769	35428	35466	NM_010194	1000	634	672	38	0	-
NM_172442	down	NR_033332	down	0.6428571	0.03115079	NR_033332	73769	21748	21806	NM_172442	1000	311	451	52	1	-
NM_172442	down	NR_033332	down	0.6428571	0.03115079	NR_033332	73769	21814	21846	NM_172442	1000	419	451	31	1	-
NM_027321	down	NR_033332	down	0.6428571	0.03115079	NR_033332	73769	10735	25171	NM_027321	1000	244	761	78	0	-
NM_023788	down	NR_033332	down	0.7142857	0.0141369	NR_033332	73769	21693	21729	NM_023788	1000	834	870	36	0	-
NM_023788	down	NR_033332	down	0.7142857	0.0141369	NR_033332	73769	21840	21877	NM_023788	1000	834	871	36	1	-
NM_010304	down	NR_033332	down	0.6428571	0.03115079	NR_033332	73769	42466	42627	NM_010304	1000	727	908	149	12	-
NM_010304	down	NR_033332	down	0.6428571	0.03115079	NR_033332	73769	13975	14124	NM_010304	1000	755	906	138	8	-
NM_010304	down	NR_033332	down	0.6428571	0.03115079	NR_033332	73769	30812	30951	NM_010304	1000	766	905	127	12	-
NM_010304	down	NR_033332	down	0.6428571	0.03115079	NR_033332	73769	71561	71689	NM_010304	1000	771	908	121	7	-
NM_010304	down	NR_033332	down	0.6428571	0.03115079	NR_033332	73769	28716	28853	NM_010304	1000	751	888	124	8	-
NM_010304	down	NR_033332	down	0.6428571	0.03115079	NR_033332	73769	52111	52245	NM_010304	1000	771	902	120	9	-
NM_009987	down	NR_033332	down	0.6428571	0.03115079	NR_033332	73769	50572	50626	NM_009987	1000	946	1000	49	5	-
NM_008461	down	NR_033332	down	0.6428571	0.03115079	NR_033332	73769	28601	28643	NM_008461	1000	415	457	38	4	-
NM_001198560	down	NR_033332	down	0.7857143	0.005505952	NR_033332	73769	13967	14109	NM_001198560	1000	559	701	131	11	-
NM_001198560	down	NR_033332	down	0.7857143	0.005505952	NR_033332	73769	42465	42603	NM_001198560	1000	558	697	127	11	-
NM_001198560	down	NR_033332	down	0.7857143	0.005505952	NR_033332	73769	30807	30945	NM_001198560	1000	559	697	125	13	-
NM_001198560	down	NR_033332	down	0.7857143	0.005505952	NR_033332	73769	71555	72128	NM_001198560	1000	573	702	118	10	-
NM_001198560	down	NR_033332	down	0.7857143	0.005505952	NR_033332	73769	52111	52225	NM_001198560	1000	573	689	102	7	-
NM_001198560	down	NR_033332	down	0.7857143	0.005505952	NR_033332	73769	28571	28841	NM_001198560	1000	547	663	84	1	-
NM_001013373	down	NR_033332	down	0.7142857	0.0141369	NR_033332	73769	13992	14116	NM_001013373	1000	545	661	92	6	-
NM_001013373	down	NR_033332	down	0.7142857	0.0141369	NR_033332	73769	43848	44019	NM_001013373	1000	548	939	91	5	-
NM_001013373	down	NR_033332	down	0.7142857	0.0141369	NR_033332	73769	52162	52244	NM_001013373	1000	555	634	72	5	-
NM_009844	down	ENSMUST00000144313	down	0.6428571	0.03115079	ENSMUST00000144313	7999	5272	5372	NM_009844	1000	648	732	80	3	+
NM_029658	down	ENSMUST00000144313	down	0.6428571	0.03115079	ENSMUST00000144313	7999	920	1079	NM_029658	1000	772	964	145	13	+
NM_001081069	down	ENSMUST00000144313	down	0.7142857	0.0141369	ENSMUST00000144313	7999	930	1088	NM_001081069	1000	319	480	148	10	+
NM_001038839	down	ENSMUST00000144313	down	0.6428571	0.03115079	ENSMUST00000144313	7999	924	1133	NM_001038839	1000	749	937	177	11	+
NM_182806	down	ENSMUST00000144313	down	1	4.96E-05	ENSMUST00000144313	7999	923	1074	NM_182806	1000	398	556	138	13	-
NM_172603	down	ENSMUST00000144313	down	0.6428571	0.03115079	ENSMUST00000144313	7999	923	1068	NM_172603	1000	169	313	133	11	-
NM_153590	down	ENSMUST00000144313	down	0.6428571	0.03115079	ENSMUST00000144313	7999	920	1054	NM_153590	1000	766	890	116	8	-
NM_023124	down	ENSMUST00000144313	down	0.8571429	0.001736111	ENSMUST00000144313	7999	928	1036	NM_023124	1000	142	262	99	9	-
NM_010304	down	ENSMUST00000144313	down	0.7142857	0.0141369	ENSMUST00000144313	7999	928	1078	NM_010304	1000	755	905	138	12	-
NM_009978	down	ENSMUST00000144313	down	0.6428571	0.03115079	ENSMUST00000144313	7999	1062	1101	NM_009978	1000	399	438	39	0	-
NM_013753	down	AK082245	down	0.6428571	0.03115079	AK082245	1253	1	58	NM_013753	1000	578	635	52	5	+
NM_013560	down	AK082245	down	0.9285714	0.000396825	AK082245	1253	19	114	NM_013560	1000	145	239	86	3	-
NM_182806	down	MM9LINCRNAEXON11338+	down	0.8571429	0.001736111	MM9LINCRNAEXON11338+	1912	284	413	NM_182806	1000	412	541	114	10	+
NM_182806	down	MM9LINCRNAEXON11338+	down	0.8571429	0.001736111	MM9LINCRNAEXON11338+	1912	357	420	NM_182806	1000	937	1000	59	4	-
NM_172603	down	MM9LINCRNAEXON11338+	down	0.6428571	0.03115079	MM9LINCRNAEXON11338+	1912	300	423	NM_172603	1000	186	309	113	10	+
NM_001164327	down	MM9LINCRNAEXON11338+	down	0.6428571	0.03115079	MM9LINCRNAEXON11338+	1912	300	423	NM_001164327	1000	163	286	112	11	+
NM_025355	down	MM9LINCRNAEXON11338+	down	0.7857143	0.005505952	MM9LINCRNAEXON11338+	1912	297	415	NM_025355	1000	577	695	108	10	-
NM_001038839	down	MM9LINCRNAEXON11338+	down	0.6428571	0.03115079	MM9LINCRNAEXON11338+	1912	284	410	NM_001038839	1000	765	885	112	8	-
NM_177182	down	uc007ues.1	down	0.6428571	0.03115079	uc007ues.1	37302	26087	26208	NM_177182	1000	360	457	93	2	+
NM_177182	down	uc007ues.1	down	0.6428571	0.03115079	uc007ues.1	37302	23071	23156	NM_177182	1000	385	470	78	7	+
NM_177182	down	uc007ues.1	down	0.6428571	0.03115079	uc007ues.1	37302	5390	5514	NM_177182	1000	360	468	101	6	-
NM_053190	down	uc007ues.1	down	0.7857143	0.005505952	uc007ues.1	37302	26088	26232	NM_053190	1000	220	376	136	7	+
NM_053190	down	uc007ues.1	down	0.7857143	0.005505952	uc007ues.1	37302	4146	4276	NM_053190	1000	250	380	124	6	-
NM_010746	down	uc007ues.1	down	0.8571429	0.001736111	uc007ues.1	37302	26088	26233	NM_010746	1000	66	222	137	8	+
NM_010746	down	uc007ues.1	down	0.8571429	0.001736111	uc007ues.1	37302	4150	4335	NM_010746	1000	51	221	162	8	-
NM_010746	down	uc007ues.1	down	0.8571429	0.001736111	uc007ues.1	37302	5378	5511	NM_010746	1000	76	209	124	9	-
NM_010746	down	uc007ues.1	down	0.8571429	0.001736111	uc007ues.1	37302	3617	3769	NM_010746	1000	64	209	124	5	-
NM_010746	down	uc007ues.1	down	0.8571429	0.001736111	uc007ues.1	37302	6620	6712	NM_010746	1000	43	159	71	2	-
NM_027283	down	uc007ues.1	down	0.6428571	0.03115079	uc007ues.1	37302	3655	3757	NM_027283	1000	363	481	96	4	+
NM_027283	down	uc007ues.1	down	0.6428571	0.03115079	uc007ues.1	37302	26090	26233	NM_027283	1000	312	468	130	7	-
NM_013813	down	uc007ues.1	down	0.6428571	0.03115079	uc007ues.1	37302	4169	4294	NM_013813	1000	80	203	113	10	+
NM_013813	down	uc007ues.1	down	0.6428571	0.03115079	uc007ues.1	37302	5402	5491	NM_013813	1000	97	186	82	7	+
NM_013813	down	uc007ues.1	down	0.6428571	0.03115079	uc007ues.1	37302	23040	23097	NM_013813	1000	142	202	55	1	-
NM_013753	down	uc007ues.1	down	0.6428571	0.03115079	uc007ues.1	37302	1647	1687	NM_013753	1000	396	436	39	1	+
NM_013653	down	uc007ues.1	down	0.6428571	0.03115079	uc007ues.1	37302	4150	26187	NM_013653	1000	609	1000	261	12	+
NM_013653	down	uc007ues.1	down	0.6428571	0.03115079	uc007ues.1	37302	5378	5529	NM_013653	1000	621	890	139	12	+
NM_013653	down	uc007ues.1	down	0.6428571	0.03115079	uc007ues.1	37302	5422	26234	NM_013653	1000	610	1000	205	11	-
NM_013653	down	uc007ues.1	down	0.6428571	0.03115079	uc007ues.1	37302	4206	4286	NM_013653	1000	866	1000	67	3	-
NM_013653	down	uc007ues.1	down	0.6428571	0.03115079	uc007ues.1	37302	6620	6673	NM_013653	1000	941	994	52	1	-
NM_008772	down	uc007ues.1	down	0.8571429	0.001736111	uc007ues.1	37302	26088	26233	NM_008772	1000	55	209	136	6	+
NM_008772	down	uc007ues.1	down	0.8571429	0.001736111	uc007ues.1	37302	1644	4309	NM_008772	1000	50	776	180	12	-
NM_008772	down	uc007ues.1	down	0.8571429	0.001736111	uc007ues.1	37302	5378	5491	NM_008772	1000	83	196	103	10	-
NM_008772	down	uc007ues.1	down	0.8571429	0.001736111	uc007ues.1	37302	5953	6040	NM_008772	1000	725	886	79	3	-
NM_008772	down	uc007ues.1	down	0.8571429	0.001736111	uc007ues.1	37302	5984	6016	NM_008772	1000	851	883	31	1	-
NM_008670	down	uc007ues.1	down	0.6428571	0.03115079	uc007ues.1	37302	4150	4283	NM_008670	1000	674	807	122	11	+
NM_008670	down	uc007ues.1	down	0.6428571	0.03115079	uc007ues.1	37302	26117	26233	NM_008670	1000	673	800	109	7	-
NM_001033978	down	uc007ues.1	down	0.7857143	0.005505952	uc007ues.1	37302	5969	6040	NM_001033978	1000	115	168	51	2	+
NM_030682	down	uc007ues.1	down	0.6428571	0.03115079	uc007ues.1	37302	32005	32054	NM_030682	1000	494	543	45	4	-
NM_009910	down	uc007ues.1	down	0.6428571	0.03115079	uc007ues.1	37302	32769	32826	NM_009910	1000	653	710	57	0	-
NM_009378	down	uc007ues.1	down	0.7857143	0.005505952	uc007ues.1	37302	5980	6013	NM_009378	1000	697	732	33	0	-
NM_019738	down	AK137777	down	0.8571429	0.001736111	AK137777	2541	386	504	NM_019738	1000	842	963	89	3	+
NM_008366	down	AK137777	down	0.7857143	0.005505952	AK137777	2541	2210	2270	NM_008366	1000	524	583	59	0	+
NM_177691	down	AK137777	down	0.7142857	0.0141369	AK137777	2541	2209	2240	NM_177691	1000	699	730	31	0	-
NM_173433	down	AK137777	down	0.7857143	0.005505952	AK137777	2541	600	637	NM_173433	1000	810	847	36	1	-
NM_011616	down	AK137777	down	0.6428571	0.03115079	AK137777	2541	2209	2270	NM_011616	1000	159	225	60	0	-
NM_177182	down	MM9LINCRNAEXON10576-	down	0.7142857	0.0141369	MM9LINCRNAEXON10576-	1254	1065	1151	NM_177182	1000	384	470	83	3	+
NM_053190	down	MM9LINCRNAEXON10576-	down	0.7142857	0.0141369	MM9LINCRNAEXON10576-	1254	1035	1157	NM_053190	1000	238	360	117	5	+
NM_010746	down	MM9LINCRNAEXON10576-	down	0.7857143	0.005505952	MM9LINCRNAEXON10576-	1254	1035	1157	NM_010746	1000	83	205	115	6	+
NM_008772	down	MM9LINCRNAEXON10576-	down	0.9285714	0.000396825	MM9LINCRNAEXON10576-	1254	1035	1174	NM_008772	1000	70	209	128	11	+
NM_026931	down	ENSMUST00000147649	down	0.7142857	0.0141369	ENSMUST00000147649	64371	53159	53322	NM_026931	1000	576	748	151	4	+
NM_026931	down	ENSMUST00000147649	down	0.7142857	0.0141369	ENSMUST00000147649	64371	55307	55432	NM_026931	1000	622	747	116	9	+
NM_026931	down	ENSMUST00000147649	down	0.7142857	0.0141369	ENSMUST00000147649	64371	28531	28642	NM_026931	1000	622	735	104	3	+
NM_026931	down	ENSMUST00000147649	down	0.7142857	0.0141369	ENSMUST00000147649	64371	52237	52361	NM_026931	1000	622	746	117	7	-
NM_026931	down	ENSMUST00000147649	down	0.7142857	0.0141369	ENSMUST00000147649	64371	25274	25363	NM_026931	1000	658	747	84	3	-
NM_009799	down	ENSMUST00000147649	down	0.6428571	0.03115079	ENSMUST00000147649	64371	24067	24127	NM_009799	1000	558	616	57	1	+
NM_009799	down	ENSMUST00000147649	down	0.6428571	0.03115079	ENSMUST00000147649	64371	36693	36730	NM_009799	1000	650	687	35	2	-
NM_009932	down	MM9LINCRNAEXON10684-	down	0.6428571	0.03115079	MM9LINCRNAEXON10684-	1237	54	114	NM_009932	1000	271	341	58	2	+
NM_177691	down	MM9LINCRNAEXON10684-	down	0.6428571	0.03115079	MM9LINCRNAEXON10684-	1237	51	98	NM_177691	1000	702	749	47	0	-
NM_001033978	down	uc007cnr.1	down	0.6428571	0.03115079	uc007cnr.1	26746	5025	5082	NM_001033978	1000	115	172	56	1	+
NM_009799	down	uc007cnr.1	down	0.8571429	0.001736111	uc007cnr.1	26746	725	772	NM_009799	1000	557	604	47	0	+
NM_001083957	down	uc007cnr.1	down	0.7142857	0.0141369	uc007cnr.1	26746	725	772	NM_001083957	1000	557	604	47	0	+
NM_053190	down	uc007cnr.1	down	0.7857143	0.005505952	uc007cnr.1	26746	11598	11763	NM_053190	1000	219	381	153	6	-
NM_008772	down	uc007cnr.1	down	0.7142857	0.0141369	uc007cnr.1	26746	11595	11757	NM_008772	1000	51	216	150	10	-
NM_027321	down	uc009mjt.1	down	0.7142857	0.0141369	uc009mjt.1	3785	413	477	NM_027321	1000	697	761	58	6	-
NM_023124	down	ENSMUST00000133960	down	0.6428571	0.03115079	ENSMUST00000133960	12089	3791	3906	NM_023124	1000	142	265	101	6	+
NM_177691	down	ENSMUST00000134998	down	0.7857143	0.005505952	ENSMUST00000134998	5007	2192	2239	NM_177691	1000	702	749	47	0	+
NM_173433	down	ENSMUST00000134998	down	0.8571429	0.001736111	ENSMUST00000134998	5007	2292	2322	NM_173433	1000	817	847	30	0	+
NM_010780	down	ENSMUST00000134998	down	0.6428571	0.03115079	ENSMUST00000134998	5007	2307	2436	NM_010780	1000	314	393	64	0	-
NM_008366	down	ENSMUST00000134998	down	0.8571429	0.001736111	ENSMUST00000134998	5007	2284	2325	NM_008366	1000	508	559	40	1	-
NM_198860	down	ENSMUST00000118879	down	0.7142857	0.0141369	ENSMUST00000118879	20466	12128	12206	NM_198860	1000	645	822	76	0	+
NM_021718	down	ENSMUST00000118879	down	0.7142857	0.0141369	ENSMUST00000118879	20466	7110	7163	NM_021718	1000	115	170	48	1	+
NM_018752	down	ENSMUST00000118879	down	0.6428571	0.03115079	ENSMUST00000118879	20466	6293	6327	NM_018752	1000	95	129	32	2	+
NM_010780	down	ENSMUST00000118879	down	0.7142857	0.0141369	ENSMUST00000118879	20466	6251	6319	NM_010780	1000	336	393	51	1	+
NM_009987	down	ENSMUST00000118879	down	0.6428571	0.03115079	ENSMUST00000118879	20466	6258	6337	NM_009987	1000	502	585	47	0	+
NM_009932	down	ENSMUST00000118879	down	0.8571429	0.001736111	ENSMUST00000118879	20466	6251	6317	NM_009932	1000	133	251	44	1	+
NM_008632	down	ENSMUST00000118879	down	0.7857143	0.005505952	ENSMUST00000118879	20466	6248	6347	NM_008632	1000	55	122	64	3	+
NM_008090	down	ENSMUST00000118879	down	0.9285714	0.000396825	ENSMUST00000118879	20466	6273	6324	NM_008090	1000	600	647	42	2	+
NM_001166376	down	ENSMUST00000118879	down	0.9285714	0.000396825	ENSMUST00000118879	20466	8342	8891	NM_001166376	1000	153	704	525	24	+
NM_001166376	down	ENSMUST00000118879	down	0.9285714	0.000396825	ENSMUST00000118879	20466	2335	3133	NM_001166376	1000	153	715	535	25	-
NM_013653	down	ENSMUST00000118879	down	0.9285714	0.000396825	ENSMUST00000118879	20466	3271	3513	NM_013653	1000	656	995	77	5	+
NM_001099918	down	ENSMUST00000118879	down	0.6428571	0.03115079	ENSMUST00000118879	20466	3390	3426	NM_001099918	1000	909	946	36	0	-
NM_001099918	down	ENSMUST00000118879	down	0.6428571	0.03115079	ENSMUST00000118879	20466	3396	3431	NM_001099918	1000	909	944	34	1	-
NM_009910	down	ENSMUST00000118879	down	0.7857143	0.005505952	ENSMUST00000118879	20466	6344	12137	NM_009910	1000	639	711	49	1	-
NM_008125	down	ENSMUST00000118879	down	0.7142857	0.0141369	ENSMUST00000118879	20466	12173	12206	NM_008125	1000	671	704	33	0	-
NM_008125	down	ENSMUST00000118879	down	0.7142857	0.0141369	ENSMUST00000118879	20466	6345	6375	NM_008125	1000	641	671	30	0	-
NM_177691	down	ENSMUST00000118879	down	0.7142857	0.0141369	ENSMUST00000118879	20466	6251	6287	NM_177691	1000	701	737	34	2	-
NM_027788	down	ENSMUST00000118879	down	0.7857143	0.005505952	ENSMUST00000118879	20466	6245	6310	NM_027788	1000	153	208	51	2	-
NM_011658	down	ENSMUST00000118879	down	0.9285714	0.000396825	ENSMUST00000118879	20466	6250	6310	NM_011658	1000	684	732	46	2	-
NM_011616	down	ENSMUST00000118879	down	0.9285714	0.000396825	ENSMUST00000118879	20466	6251	6372	NM_011616	1000	165	266	96	2	-
NM_007974	down	ENSMUST00000118879	down	0.9285714	0.000396825	ENSMUST00000118879	20466	6292	6348	NM_007974	1000	237	294	55	1	-
NM_001033978	down	ENSMUST00000118879	down	0.6428571	0.03115079	ENSMUST00000118879	20466	6262	6346	NM_001033978	1000	123	173	50	0	-
NM_133203	down	AK157086	down	0.7142857	0.0141369	AK157086	1880	508	550	NM_133203	1000	755	797	42	0	-
NM_013813	down	MM9LINCRNAEXON12067-	down	0.7857143	0.005505952	MM9LINCRNAEXON12067-	1262	896	976	NM_013813	1000	113	193	72	8	+
NM_182806	down	uc008vpq.1	down	0.6428571	0.03115079	uc008vpq.1	10744	6831	7014	NM_182806	1000	381	560	159	8	+
NM_182806	down	uc008vpq.1	down	0.6428571	0.03115079	uc008vpq.1	10744	6941	7015	NM_182806	1000	924	999	69	2	-
NM_177182	down	uc008vpq.1	down	0.6428571	0.03115079	uc008vpq.1	10744	6867	6983	NM_177182	1000	371	470	96	3	+
NM_177182	down	uc008vpq.1	down	0.6428571	0.03115079	uc008vpq.1	10744	4793	4878	NM_177182	1000	385	470	75	3	-
NM_172603	down	uc008vpq.1	down	0.7142857	0.0141369	uc008vpq.1	10744	6883	6994	NM_172603	1000	186	297	106	5	+
NM_153590	down	uc008vpq.1	down	0.8571429	0.001736111	uc008vpq.1	10744	6880	7010	NM_153590	1000	766	887	112	8	+
NM_153590	down	uc008vpq.1	down	0.8571429	0.001736111	uc008vpq.1	10744	4757	4896	NM_153590	1000	766	896	119	10	-
NM_153068	down	uc008vpq.1	down	0.6428571	0.03115079	uc008vpq.1	10744	4832	4894	NM_153068	1000	729	791	58	4	+
NM_053190	down	uc008vpq.1	down	0.6428571	0.03115079	uc008vpq.1	10744	6867	7015	NM_053190	1000	238	386	144	4	+
NM_053190	down	uc008vpq.1	down	0.6428571	0.03115079	uc008vpq.1	10744	4784	4903	NM_053190	1000	244	364	107	4	-
NM_029658	down	uc008vpq.1	down	0.8571429	0.001736111	uc008vpq.1	10744	4792	4905	NM_029658	1000	802	915	102	11	+
NM_029658	down	uc008vpq.1	down	0.8571429	0.001736111	uc008vpq.1	10744	6873	7005	NM_029658	1000	781	913	120	12	-
NM_027283	down	uc008vpq.1	down	0.9285714	0.000396825	uc008vpq.1	10744	4766	4904	NM_027283	1000	307	446	126	12	+
NM_027283	down	uc008vpq.1	down	0.9285714	0.000396825	uc008vpq.1	10744	6863	6966	NM_027283	1000	356	484	91	7	-
NM_010304	down	uc008vpq.1	down	0.7857143	0.005505952	uc008vpq.1	10744	6873	7005	NM_010304	1000	772	904	122	10	+
NM_009127	down	uc008vpq.1	down	0.8571429	0.001736111	uc008vpq.1	10744	6840	7010	NM_009127	1000	680	835	139	8	+
NM_009127	down	uc008vpq.1	down	0.8571429	0.001736111	uc008vpq.1	10744	4785	4916	NM_009127	1000	684	817	115	6	-
NM_007974	down	uc008vpq.1	down	0.7857143	0.005505952	uc008vpq.1	10744	6855	6990	NM_007974	1000	538	726	44	0	+
NM_001198560	down	uc008vpq.1	down	0.9285714	0.000396825	uc008vpq.1	10744	6883	7010	NM_001198560	1000	569	697	116	11	+
NM_001164327	down	uc008vpq.1	down	0.7142857	0.0141369	uc008vpq.1	10744	6813	6994	NM_001164327	1000	106	274	150	9	+
NM_001081069	down	uc008vpq.1	down	0.9285714	0.000396825	uc008vpq.1	10744	4773	4916	NM_001081069	1000	319	462	127	11	+
NM_001081069	down	uc008vpq.1	down	0.9285714	0.000396825	uc008vpq.1	10744	6846	7014	NM_001081069	1000	309	480	159	9	-
NM_013653	down	uc008vpq.1	down	0.7857143	0.005505952	uc008vpq.1	10744	4818	6949	NM_013653	1000	656	1000	144	9	+
NM_013653	down	uc008vpq.1	down	0.7857143	0.005505952	uc008vpq.1	10744	4827	7005	NM_013653	1000	609	1000	225	10	-
NM_001163550	down	uc008vpq.1	down	0.7142857	0.0141369	uc008vpq.1	10744	6839	7015	NM_001163550	1000	567	732	158	7	+
NM_023124	down	uc008vpq.1	down	0.6428571	0.03115079	uc008vpq.1	10744	4769	4879	NM_023124	1000	141	267	95	3	-
NM_001013373	down	uc008vpq.1	down	0.7142857	0.0141369	uc008vpq.1	10744	4833	4903	NM_001013373	1000	555	625	64	6	-
NM_028125	down	uc008vpq.1	down	0.6428571	0.03115079	uc008vpq.1	10744	6842	7005	NM_028125	1000	803	958	140	6	-
NM_025355	down	uc008vpq.1	down	0.7142857	0.0141369	uc008vpq.1	10744	6866	7010	NM_025355	1000	565	708	134	7	-
NM_008670	down	uc008vpq.1	down	0.9285714	0.000396825	uc008vpq.1	10744	6872	6994	NM_008670	1000	685	807	115	7	-
NM_008337	down	uc008vpq.1	down	0.7142857	0.0141369	uc008vpq.1	10744	9540	9652	NM_008337	1000	526	671	56	4	-
NM_053190	down	AK086020	down	0.8571429	0.001736111	AK086020	2047	1855	1911	NM_053190	1000	255	311	53	3	+
NM_013753	down	AK086020	down	0.7142857	0.0141369	AK086020	2047	77	260	NM_013753	1000	513	691	164	13	+
NM_013653	down	AK086020	down	0.7142857	0.0141369	AK086020	2047	1847	1911	NM_013653	1000	927	991	59	5	+
NM_010746	down	AK086020	down	0.6428571	0.03115079	AK086020	2047	1855	1911	NM_010746	1000	100	156	53	3	+
NM_025355	down	AK086020	down	0.6428571	0.03115079	AK086020	2047	1869	1910	NM_025355	1000	636	677	38	3	-
NM_013813	down	AK086020	down	0.7142857	0.0141369	AK086020	2047	1855	1911	NM_013813	1000	126	182	52	4	-
NM_177182	down	uc007cso.1	down	0.6428571	0.03115079	uc007cso.1	24743	14716	14801	NM_177182	1000	385	470	84	1	+
NM_177182	down	uc007cso.1	down	0.6428571	0.03115079	uc007cso.1	24743	9367	9493	NM_177182	1000	358	470	100	5	-
NM_053190	down	uc007cso.1	down	0.6428571	0.03115079	uc007cso.1	24743	14675	14823	NM_053190	1000	230	376	142	4	+
NM_053190	down	uc007cso.1	down	0.6428571	0.03115079	uc007cso.1	24743	9345	9503	NM_053190	1000	221	376	142	10	-
NM_013813	down	uc007cso.1	down	0.6428571	0.03115079	uc007cso.1	24743	9364	23324	NM_013813	1000	80	1000	392	24	+
NM_025355	down	AK132876	down	0.7142857	0.0141369	AK132876	1666	1519	1642	NM_025355	1000	563	686	114	9	+
NM_001081069	down	AK132876	down	0.7857143	0.005505952	AK132876	1666	1538	1663	NM_001081069	1000	330	450	113	7	+
NM_177182	down	AK132876	down	0.7857143	0.005505952	AK132876	1666	1548	1666	NM_177182	1000	374	470	89	7	-
NM_172603	down	AK132876	down	0.8571429	0.001736111	AK132876	1666	1537	1642	NM_172603	1000	192	297	98	7	-
NM_053190	down	AK132876	down	0.6428571	0.03115079	AK132876	1666	1521	1666	NM_053190	1000	241	381	131	9	-
NM_013653	down	AK132876	down	0.9285714	0.000396825	AK132876	1666	1582	1641	NM_013653	1000	941	1000	57	2	-
NM_010746	down	AK132876	down	0.7142857	0.0141369	AK132876	1666	1537	1642	NM_010746	1000	105	210	97	8	-
NM_009987	down	AK132876	down	0.6428571	0.03115079	AK132876	1666	1558	1613	NM_009987	1000	947	996	47	2	-
NM_001198560	down	AK132876	down	0.7857143	0.005505952	AK132876	1666	1591	1642	NM_001198560	1000	575	626	48	3	-
NM_001164327	down	AK132876	down	0.8571429	0.001736111	AK132876	1666	1537	1642	NM_001164327	1000	169	274	95	10	-
NM_172603	down	AK086535	down	0.6428571	0.03115079	AK086535	1522	937	1074	NM_172603	1000	101	296	119	6	+
NM_010304	down	AK086535	down	0.7142857	0.0141369	AK086535	1522	957	1074	NM_010304	1000	755	892	110	6	+
NM_021718	down	NR_024599	down	0.7142857	0.0141369	NR_024599	6644	4316	4400	NM_021718	1000	102	232	74	2	+
NM_021718	down	NR_024599	down	0.7142857	0.0141369	NR_024599	6644	4328	4439	NM_021718	1000	87	170	61	0	-
NM_011658	down	NR_024599	down	0.6428571	0.03115079	NR_024599	6644	613	660	NM_011658	1000	684	731	46	1	+
NM_011658	down	NR_024599	down	0.6428571	0.03115079	NR_024599	6644	1963	1998	NM_011658	1000	696	731	35	0	-
NM_011616	down	NR_024599	down	0.6428571	0.03115079	NR_024599	6644	613	668	NM_011616	1000	217	272	54	1	+
NM_177691	down	NR_024599	down	0.7142857	0.0141369	NR_024599	6644	1960	1997	NM_177691	1000	713	750	37	0	-
NM_145133	down	NR_024599	down	0.7857143	0.005505952	NR_024599	6644	1960	1997	NM_145133	1000	299	336	37	0	-
NM_023788	down	NR_024599	down	0.7142857	0.0141369	NR_024599	6644	613	650	NM_023788	1000	835	872	37	0	-
NM_009987	down	NR_024599	down	0.7857143	0.005505952	NR_024599	6644	4414	4456	NM_009987	1000	539	605	40	1	-
NM_001166376	down	uc008gsu.1	down	0.6428571	0.03115079	uc008gsu.1	23593	4973	5513	NM_001166376	1000	165	704	491	32	+
NM_001166376	down	uc008gsu.1	down	0.6428571	0.03115079	uc008gsu.1	23593	14137	14677	NM_001166376	1000	150	704	476	39	+
NM_014194	down	uc007vxz.1	down	0.7857143	0.005505952	uc007vxz.1	43140	38993	39125	NM_014194	1000	606	772	112	0	+
NM_014194	down	uc007vxz.1	down	0.7857143	0.005505952	uc007vxz.1	43140	39051	39127	NM_014194	1000	96	212	74	1	-
NM_014194	down	uc007vxz.1	down	0.7857143	0.005505952	uc007vxz.1	43140	39051	39126	NM_014194	1000	57	132	71	4	-
NM_001035531	down	uc007vxz.1	down	0.7142857	0.0141369	uc007vxz.1	43140	39051	39127	NM_001035531	1000	30	125	76	0	+
NM_001035531	down	uc007vxz.1	down	0.7142857	0.0141369	uc007vxz.1	43140	39051	39127	NM_001035531	1000	34	121	64	0	+
NM_010780	down	uc007vxz.1	down	0.7857143	0.005505952	uc007vxz.1	43140	35597	35659	NM_010780	1000	343	406	53	0	+
NM_010780	down	uc007vxz.1	down	0.7857143	0.005505952	uc007vxz.1	43140	35597	35661	NM_010780	1000	333	392	46	0	+
NM_010649	down	uc007vxz.1	down	0.8571429	0.001736111	uc007vxz.1	43140	38985	39040	NM_010649	1000	783	841	53	1	+
NM_010646	down	uc007vxz.1	down	0.7857143	0.005505952	uc007vxz.1	43140	38985	39040	NM_010646	1000	790	848	53	1	+
NM_010646	down	uc007vxz.1	down	0.7857143	0.005505952	uc007vxz.1	43140	38999	39043	NM_010646	1000	392	452	42	2	-
NM_053153	down	uc007vxz.1	down	0.7857143	0.005505952	uc007vxz.1	43140	38985	39120	NM_053153	1000	498	658	78	2	+
NM_053153	down	uc007vxz.1	down	0.7857143	0.005505952	uc007vxz.1	43140	25549	25743	NM_053153	1000	660	869	90	1	+
NM_001166376	down	uc007vxz.1	down	0.8571429	0.001736111	uc007vxz.1	43140	2641	3190	NM_001166376	1000	153	704	532	16	+
NM_001166376	down	uc007vxz.1	down	0.8571429	0.001736111	uc007vxz.1	43140	24027	24333	NM_001166376	1000	398	704	277	29	+
NM_001166376	down	uc007vxz.1	down	0.8571429	0.001736111	uc007vxz.1	43140	9032	9183	NM_001166376	1000	244	395	139	12	+
NM_001166376	down	uc007vxz.1	down	0.8571429	0.001736111	uc007vxz.1	43140	23886	24027	NM_001166376	1000	235	397	130	9	+
NM_001164329	down	uc007vxz.1	down	0.7857143	0.005505952	uc007vxz.1	43140	23824	24392	NM_001164329	1000	405	1000	488	43	+
NM_001164329	down	uc007vxz.1	down	0.7857143	0.005505952	uc007vxz.1	43140	33955	34362	NM_001164329	1000	581	1000	355	32	-
NM_008461	down	uc007vxz.1	down	0.7142857	0.0141369	uc007vxz.1	43140	9243	9696	NM_008461	1000	544	1000	402	40	-
NM_177691	down	uc007vxz.1	down	0.7857143	0.005505952	uc007vxz.1	43140	35622	35661	NM_177691	1000	712	751	37	2	-
NM_146717	down	uc007vxz.1	down	0.6428571	0.03115079	uc007vxz.1	43140	27957	28013	NM_146717	1000	242	299	55	1	-
NM_027788	down	uc007vxz.1	down	0.7142857	0.0141369	uc007vxz.1	43140	35602	35653	NM_027788	1000	153	200	45	2	-
NM_027788	down	uc007vxz.1	down	0.7142857	0.0141369	uc007vxz.1	43140	35597	35641	NM_027788	1000	153	193	39	1	-
NM_011852	down	uc007vxz.1	down	0.7857143	0.005505952	uc007vxz.1	43140	35597	35647	NM_011852	1000	35	81	45	1	-
NM_011658	down	uc007vxz.1	down	0.7142857	0.0141369	uc007vxz.1	43140	35597	35636	NM_011658	1000	685	722	36	1	-
NM_011616	down	uc007vxz.1	down	0.8571429	0.001736111	uc007vxz.1	43140	35597	35640	NM_011616	1000	194	233	38	1	-
NM_010391	down	AV495601	down	0.7142857	0.0141369	AV495601	9251	3206	3236	NM_010391	1000	20	50	30	0	+
NM_011658	down	AV495601	down	0.6428571	0.03115079	AV495601	9251	3206	3250	NM_011658	1000	678	726	44	0	-
NM_010194	down	AV495601	down	0.8571429	0.001736111	AV495601	9251	3206	3347	NM_010194	1000	587	663	43	0	-
NM_011616	down	AV495601	down	0.7857143	0.005505952	AV495601	9251	3204	3244	NM_011616	1000	205	245	38	2	-
NM_025355	down	AK142162	down	0.7857143	0.005505952	AK142162	3282	2891	3012	NM_025355	1000	581	704	110	10	+
NM_001081069	down	AK142162	down	0.7142857	0.0141369	AK142162	3282	2892	3012	NM_001081069	1000	330	450	112	8	+
NM_001038839	down	AK142162	down	0.9285714	0.000396825	AK142162	3282	2879	3012	NM_001038839	1000	752	885	123	10	+
NM_182806	down	AK142162	down	0.7142857	0.0141369	AK142162	3282	2891	3012	NM_182806	1000	413	539	110	11	-
NM_001163550	down	AK142162	down	0.7857143	0.005505952	AK142162	3282	2872	3013	NM_001163550	1000	596	730	123	11	-
NM_009910	down	ENSMUST00000135363	down	0.9285714	0.000396825	ENSMUST00000135363	16966	13882	13922	NM_009910	1000	647	687	40	0	+
NM_182806	down	ENSMUST00000135363	down	0.6428571	0.03115079	ENSMUST00000135363	16966	6884	6934	NM_182806	1000	950	1000	49	1	+
NM_182806	down	ENSMUST00000135363	down	0.6428571	0.03115079	ENSMUST00000135363	16966	6884	7003	NM_182806	1000	411	535	116	2	-
NM_182806	down	ENSMUST00000135363	down	0.6428571	0.03115079	ENSMUST00000135363	16966	3494	3609	NM_182806	1000	412	538	107	5	-
NM_182806	down	ENSMUST00000135363	down	0.6428571	0.03115079	ENSMUST00000135363	16966	14413	14485	NM_182806	1000	411	488	68	4	-
NM_182806	down	ENSMUST00000135363	down	0.6428571	0.03115079	ENSMUST00000135363	16966	5944	6012	NM_182806	1000	403	475	65	3	-
NM_177078	down	ENSMUST00000135363	down	0.6428571	0.03115079	ENSMUST00000135363	16966	6884	6937	NM_177078	1000	947	1000	49	4	+
NM_177078	down	ENSMUST00000135363	down	0.6428571	0.03115079	ENSMUST00000135363	16966	2448	2493	NM_177078	1000	955	1000	42	3	-
NM_030682	down	ENSMUST00000135363	down	0.7857143	0.005505952	ENSMUST00000135363	16966	7480	7515	NM_030682	1000	191	227	34	0	+
NM_177182	down	ENSMUST00000135363	down	0.6428571	0.03115079	ENSMUST00000135363	16966	2412	2494	NM_177182	1000	388	470	74	8	+
NM_177182	down	ENSMUST00000135363	down	0.6428571	0.03115079	ENSMUST00000135363	16966	3504	3634	NM_177182	1000	361	470	99	2	-
NM_177182	down	ENSMUST00000135363	down	0.6428571	0.03115079	ENSMUST00000135363	16966	5896	6016	NM_177182	1000	367	470	98	2	-
NM_177182	down	ENSMUST00000135363	down	0.6428571	0.03115079	ENSMUST00000135363	16966	6891	7018	NM_177182	1000	362	470	103	4	-
NM_172603	down	ENSMUST00000135363	down	0.7142857	0.0141369	ENSMUST00000135363	16966	2379	2498	NM_172603	1000	169	290	111	8	+
NM_172603	down	ENSMUST00000135363	down	0.7142857	0.0141369	ENSMUST00000135363	16966	5869	5999	NM_172603	1000	183	313	124	6	-
NM_153590	down	ENSMUST00000135363	down	0.8571429	0.001736111	ENSMUST00000135363	16966	2391	2498	NM_153590	1000	766	863	91	6	+
NM_153590	down	ENSMUST00000135363	down	0.8571429	0.001736111	ENSMUST00000135363	16966	3474	3601	NM_153590	1000	766	890	113	8	-
NM_153590	down	ENSMUST00000135363	down	0.8571429	0.001736111	ENSMUST00000135363	16966	6884	6994	NM_153590	1000	766	866	96	4	-
NM_153590	down	ENSMUST00000135363	down	0.8571429	0.001736111	ENSMUST00000135363	16966	14412	14476	NM_153590	1000	766	830	59	5	-
NM_053190	down	ENSMUST00000135363	down	0.6428571	0.03115079	ENSMUST00000135363	16966	2351	2498	NM_053190	1000	221	358	124	9	+
NM_053190	down	ENSMUST00000135363	down	0.6428571	0.03115079	ENSMUST00000135363	16966	3494	3629	NM_053190	1000	220	364	129	6	-
NM_053190	down	ENSMUST00000135363	down	0.6428571	0.03115079	ENSMUST00000135363	16966	5885	7025	NM_053190	1000	225	365	137	3	-
NM_053190	down	ENSMUST00000135363	down	0.6428571	0.03115079	ENSMUST00000135363	16966	6697	14494	NM_053190	1000	233	380	114	6	-
NM_029658	down	ENSMUST00000135363	down	0.8571429	0.001736111	ENSMUST00000135363	16966	3494	3609	NM_029658	1000	793	914	103	9	+
NM_029658	down	ENSMUST00000135363	down	0.8571429	0.001736111	ENSMUST00000135363	16966	2376	2498	NM_029658	1000	799	967	113	9	-
NM_028125	down	ENSMUST00000135363	down	0.6428571	0.03115079	ENSMUST00000135363	16966	5859	5999	NM_028125	1000	781	928	131	9	+
NM_027283	down	ENSMUST00000135363	down	0.9285714	0.000396825	ENSMUST00000135363	16966	3480	3642	NM_027283	1000	311	479	141	7	+
NM_027283	down	ENSMUST00000135363	down	0.9285714	0.000396825	ENSMUST00000135363	16966	6697	7023	NM_027283	1000	308	465	143	7	+
NM_027283	down	ENSMUST00000135363	down	0.9285714	0.000396825	ENSMUST00000135363	16966	5869	6016	NM_027283	1000	307	458	120	8	+
NM_027283	down	ENSMUST00000135363	down	0.9285714	0.000396825	ENSMUST00000135363	16966	2356	2498	NM_027283	1000	331	482	131	10	-
NM_027283	down	ENSMUST00000135363	down	0.9285714	0.000396825	ENSMUST00000135363	16966	13351	13535	NM_027283	1000	322	440	68	5	-
NM_025355	down	ENSMUST00000135363	down	0.7142857	0.0141369	ENSMUST00000135363	16966	5864	6010	NM_025355	1000	560	708	134	11	+
NM_025355	down	ENSMUST00000135363	down	0.7142857	0.0141369	ENSMUST00000135363	16966	3524	3612	NM_025355	1000	618	708	83	4	+
NM_025355	down	ENSMUST00000135363	down	0.7142857	0.0141369	ENSMUST00000135363	16966	2380	2498	NM_025355	1000	588	708	109	5	-
NM_025355	down	ENSMUST00000135363	down	0.7142857	0.0141369	ENSMUST00000135363	16966	4778	4849	NM_025355	1000	606	676	62	2	-
NM_023124	down	ENSMUST00000135363	down	0.6428571	0.03115079	ENSMUST00000135363	16966	2412	2498	NM_023124	1000	145	243	81	5	+
NM_023124	down	ENSMUST00000135363	down	0.6428571	0.03115079	ENSMUST00000135363	16966	4778	4850	NM_023124	1000	143	214	55	1	+
NM_023124	down	ENSMUST00000135363	down	0.6428571	0.03115079	ENSMUST00000135363	16966	3494	3583	NM_023124	1000	142	249	83	6	-
NM_013753	down	ENSMUST00000135363	down	0.7857143	0.005505952	ENSMUST00000135363	16966	10219	10407	NM_013753	1000	505	691	168	11	+
NM_013753	down	ENSMUST00000135363	down	0.7857143	0.005505952	ENSMUST00000135363	16966	5233	5298	NM_013753	1000	593	658	61	4	+
NM_013653	down	ENSMUST00000135363	down	0.7857143	0.005505952	ENSMUST00000135363	16966	5865	7089	NM_013653	1000	600	916	173	9	+
NM_013653	down	ENSMUST00000135363	down	0.7857143	0.005505952	ENSMUST00000135363	16966	6884	14950	NM_013653	1000	624	896	142	8	+
NM_013653	down	ENSMUST00000135363	down	0.7857143	0.005505952	ENSMUST00000135363	16966	5930	7091	NM_013653	1000	740	1000	109	3	-
NM_013653	down	ENSMUST00000135363	down	0.7857143	0.005505952	ENSMUST00000135363	16966	6925	6984	NM_013653	1000	941	1000	57	2	-
NM_013653	down	ENSMUST00000135363	down	0.7857143	0.005505952	ENSMUST00000135363	16966	14413	14466	NM_013653	1000	941	994	51	2	-
NM_010304	down	ENSMUST00000135363	down	0.7857143	0.005505952	ENSMUST00000135363	16966	2379	2498	NM_010304	1000	766	886	109	10	+
NM_010304	down	ENSMUST00000135363	down	0.7857143	0.005505952	ENSMUST00000135363	16966	3481	3635	NM_010304	1000	744	905	137	9	-
NM_010304	down	ENSMUST00000135363	down	0.7857143	0.005505952	ENSMUST00000135363	16966	14413	14494	NM_010304	1000	760	842	76	5	-
NM_008670	down	ENSMUST00000135363	down	0.9285714	0.000396825	ENSMUST00000135363	16966	5866	5999	NM_008670	1000	666	799	123	10	+
NM_008670	down	ENSMUST00000135363	down	0.9285714	0.000396825	ENSMUST00000135363	16966	2384	2498	NM_008670	1000	692	806	104	10	-
NM_001164327	down	ENSMUST00000135363	down	0.7142857	0.0141369	ENSMUST00000135363	16966	2384	2498	NM_001164327	1000	153	267	105	9	+
NM_001164327	down	ENSMUST00000135363	down	0.7142857	0.0141369	ENSMUST00000135363	16966	5873	5999	NM_001164327	1000	160	286	119	7	-
NM_001164327	down	ENSMUST00000135363	down	0.7142857	0.0141369	ENSMUST00000135363	16966	3481	3608	NM_001164327	1000	153	283	113	8	-
NM_001163550	down	ENSMUST00000135363	down	0.7142857	0.0141369	ENSMUST00000135363	16966	1892	2498	NM_001163550	1000	567	711	131	9	+
NM_001163550	down	ENSMUST00000135363	down	0.7142857	0.0141369	ENSMUST00000135363	16966	5865	7006	NM_001163550	1000	592	731	133	4	-
NM_001163550	down	ENSMUST00000135363	down	0.7142857	0.0141369	ENSMUST00000135363	16966	3495	3634	NM_001163550	1000	574	716	127	8	-
NM_001081069	down	ENSMUST00000135363	down	0.9285714	0.000396825	ENSMUST00000135363	16966	5869	5999	NM_001081069	1000	313	443	122	8	+
NM_001081069	down	ENSMUST00000135363	down	0.9285714	0.000396825	ENSMUST00000135363	16966	3483	3639	NM_001081069	1000	319	480	143	12	+
NM_001013373	down	ENSMUST00000135363	down	0.7142857	0.0141369	ENSMUST00000135363	16966	4778	4829	NM_001013373	1000	581	633	44	0	+
NM_001013373	down	ENSMUST00000135363	down	0.7142857	0.0141369	ENSMUST00000135363	16966	6696	7009	NM_001013373	1000	548	745	108	3	-
NM_009127	down	ENSMUST00000135363	down	0.8571429	0.001736111	ENSMUST00000135363	16966	5865	5989	NM_009127	1000	715	839	117	7	-
NM_009127	down	ENSMUST00000135363	down	0.8571429	0.001736111	ENSMUST00000135363	16966	3514	3622	NM_009127	1000	676	792	102	4	-
NM_001198560	down	ENSMUST00000135363	down	0.9285714	0.000396825	ENSMUST00000135363	16966	5873	7018	NM_001198560	1000	543	692	136	12	-
NM_001198560	down	ENSMUST00000135363	down	0.9285714	0.000396825	ENSMUST00000135363	16966	3514	3622	NM_001198560	1000	543	653	98	10	-
NM_198860	down	ENSMUST00000135363	down	0.8571429	0.001736111	ENSMUST00000135363	16966	12667	12737	NM_198860	1000	680	820	60	2	-
NM_018752	down	ENSMUST00000135363	down	0.6428571	0.03115079	ENSMUST00000135363	16966	2067	2102	NM_018752	1000	845	880	35	0	-
NM_018752	down	ENSMUST00000135363	down	0.6428571	0.03115079	ENSMUST00000135363	16966	1996	2101	NM_018752	1000	65	187	58	0	-
NM_013560	down	ENSMUST00000135363	down	0.9285714	0.000396825	ENSMUST00000135363	16966	14111	14193	NM_013560	1000	157	239	78	4	-
NM_023788	down	AK009242	down	0.7142857	0.0141369	AK009242	9830	6900	6937	NM_023788	1000	834	871	37	0	+
NM_010045	down	AK009242	down	0.6428571	0.03115079	AK009242	9830	5965	5995	NM_010045	1000	954	984	30	0	-
NM_008632	down	AK009242	down	0.7857143	0.005505952	AK009242	9830	5945	5995	NM_008632	1000	83	134	49	1	-
NM_008090	down	AK009242	down	0.6428571	0.03115079	AK009242	9830	5957	5995	NM_008090	1000	609	647	37	1	-
NM_023788	down	uc007pll.1	down	0.7857143	0.005505952	uc007pll.1	15671	12223	12261	NM_023788	1000	835	873	38	0	+
NM_018752	down	uc007pll.1	down	0.8571429	0.001736111	uc007pll.1	15671	12222	12277	NM_018752	1000	59	129	53	2	+
NM_018752	down	uc007pll.1	down	0.8571429	0.001736111	uc007pll.1	15671	3352	3401	NM_018752	1000	829	879	43	1	-
NM_010780	down	uc007pll.1	down	0.6428571	0.03115079	uc007pll.1	15671	12202	12281	NM_010780	1000	293	385	78	0	+
NM_008125	down	uc007pll.1	down	0.7857143	0.005505952	uc007pll.1	15671	12226	12260	NM_008125	1000	701	735	34	0	+
NM_001164423	down	uc007pll.1	down	0.9285714	0.000396825	uc007pll.1	15671	12202	12242	NM_001164423	1000	573	613	40	0	+
NM_001083957	down	uc007pll.1	down	0.6428571	0.03115079	uc007pll.1	15671	12203	12279	NM_001083957	1000	575	657	74	2	+
NM_001083957	down	uc007pll.1	down	0.6428571	0.03115079	uc007pll.1	15671	7706	7741	NM_001083957	1000	558	661	35	0	-
NM_177078	down	uc007pll.1	down	0.8571429	0.001736111	uc007pll.1	15671	4639	4713	NM_177078	1000	926	1000	67	7	+
NM_029658	down	uc007pll.1	down	0.7857143	0.005505952	uc007pll.1	15671	4635	4766	NM_029658	1000	771	902	119	12	+
NM_027283	down	uc007pll.1	down	0.7142857	0.0141369	uc007pll.1	15671	4639	4767	NM_027283	1000	307	435	116	12	+
NM_025355	down	uc007pll.1	down	0.6428571	0.03115079	uc007pll.1	15671	4636	4773	NM_025355	1000	562	698	125	11	+
NM_008670	down	uc007pll.1	down	0.7142857	0.0141369	uc007pll.1	15671	4660	4767	NM_008670	1000	689	796	101	6	+
NM_001081069	down	uc007pll.1	down	0.7142857	0.0141369	uc007pll.1	15671	4646	4767	NM_001081069	1000	319	440	109	12	+
NM_001001446	down	uc007pll.1	down	0.6428571	0.03115079	uc007pll.1	15671	4636	4747	NM_001001446	1000	843	954	101	10	+
NM_011616	down	uc007pll.1	down	0.7142857	0.0141369	uc007pll.1	15671	7706	7740	NM_011616	1000	234	268	34	0	+
NM_011616	down	uc007pll.1	down	0.7142857	0.0141369	uc007pll.1	15671	12203	12279	NM_011616	1000	198	274	74	2	-
NM_008772	down	uc007pll.1	down	0.6428571	0.03115079	uc007pll.1	15671	12204	12262	NM_008772	1000	718	776	58	0	+
NM_008772	down	uc007pll.1	down	0.6428571	0.03115079	uc007pll.1	15671	3351	4767	NM_008772	1000	86	774	151	11	-
NM_177182	down	uc007pll.1	down	0.8571429	0.001736111	uc007pll.1	15671	4668	4752	NM_177182	1000	385	469	80	4	-
NM_172603	down	uc007pll.1	down	0.7857143	0.005505952	uc007pll.1	15671	4660	4770	NM_172603	1000	183	293	106	4	-
NM_153590	down	uc007pll.1	down	0.7857143	0.005505952	uc007pll.1	15671	4636	4767	NM_153590	1000	769	890	111	10	-
NM_053190	down	uc007pll.1	down	0.7142857	0.0141369	uc007pll.1	15671	4639	4747	NM_053190	1000	274	381	101	6	-
NM_010746	down	uc007pll.1	down	0.7857143	0.005505952	uc007pll.1	15671	4660	4770	NM_010746	1000	96	206	103	7	-
NM_009127	down	uc007pll.1	down	0.7857143	0.005505952	uc007pll.1	15671	4636	4762	NM_009127	1000	713	838	116	9	-
NM_001164327	down	uc007pll.1	down	0.7857143	0.005505952	uc007pll.1	15671	4643	4770	NM_001164327	1000	160	287	116	11	-
NM_027321	down	uc007pll.1	down	0.8571429	0.001736111	uc007pll.1	15671	3350	3383	NM_027321	1000	250	283	33	0	-
NM_177691	down	uc007pll.1	down	0.6428571	0.03115079	uc007pll.1	15671	12147	12185	NM_177691	1000	333	382	36	1	-
NM_013653	down	uc007pll.1	down	0.8571429	0.001736111	uc007pll.1	15671	4701	4752	NM_013653	1000	949	1000	49	2	-
NM_011852	down	uc007pll.1	down	0.6428571	0.03115079	uc007pll.1	15671	12184	12266	NM_011852	1000	35	507	61	0	-
NM_013753	down	uc007cdl.1	down	0.8571429	0.001736111	uc007cdl.1	15175	3160	3454	NM_013753	1000	594	692	88	5	+
NM_053190	down	uc007cdl.1	down	0.8571429	0.001736111	uc007cdl.1	15175	12370	12514	NM_053190	1000	220	365	125	5	-
NM_027321	down	uc007cdl.1	down	0.7142857	0.0141369	uc007cdl.1	15175	3380	3453	NM_027321	1000	698	773	65	5	-
NM_009127	down	uc007cdl.1	down	0.6428571	0.03115079	uc007cdl.1	15175	12424	12476	NM_009127	1000	713	765	48	4	-
NM_008090	down	uc008gsi.1	down	0.6428571	0.03115079	uc008gsi.1	14413	4852	4908	NM_008090	1000	512	632	42	0	+
NM_173433	down	uc008gsi.1	down	0.7857143	0.005505952	uc008gsi.1	14413	2321	2352	NM_173433	1000	816	847	31	0	+
NM_173433	down	uc008gsi.1	down	0.7857143	0.005505952	uc008gsi.1	14413	4869	4906	NM_173433	1000	810	847	36	1	-
NM_023122	down	uc008gsi.1	down	0.9285714	0.000396825	uc008gsi.1	14413	2329	2362	NM_023122	1000	780	813	32	1	+
NM_011616	down	uc008gsi.1	down	0.6428571	0.03115079	uc008gsi.1	14413	2319	2361	NM_011616	1000	216	258	41	1	+
NM_011616	down	uc008gsi.1	down	0.6428571	0.03115079	uc008gsi.1	14413	2321	2361	NM_011616	1000	192	232	39	1	+
NM_001177959	down	uc008gsi.1	down	1	4.96E-05	uc008gsi.1	14413	2329	2362	NM_001177959	1000	780	813	32	1	+
NM_001166376	down	uc008gsi.1	down	0.6428571	0.03115079	uc008gsi.1	14413	2783	2999	NM_001166376	1000	189	414	200	15	+
NM_001166376	down	uc008gsi.1	down	0.6428571	0.03115079	uc008gsi.1	14413	10842	11842	NM_001166376	1000	0	1000	1000	0	-
NM_001025577	down	uc008gsi.1	down	0.7857143	0.005505952	uc008gsi.1	14413	2321	2364	NM_001025577	1000	313	356	42	1	+
NM_013542	down	uc008gsi.1	down	1	4.96E-05	uc008gsi.1	14413	4838	4905	NM_013542	1000	486	535	48	0	-
NM_011658	down	uc008gsi.1	down	0.6428571	0.03115079	uc008gsi.1	14413	4870	4908	NM_011658	1000	693	731	38	0	-
NM_007974	down	uc008gsi.1	down	0.6428571	0.03115079	uc008gsi.1	14413	4864	4904	NM_007974	1000	250	290	40	0	-
NM_028125	down	MM9LINCRNAEXON12112-	down	0.6428571	0.03115079	MM9LINCRNAEXON12112-	488	71	190	NM_028125	1000	815	934	109	10	+
NM_013653	down	MM9LINCRNAEXON12112-	down	0.9285714	0.000396825	MM9LINCRNAEXON12112-	488	71	197	NM_013653	1000	621	747	116	10	+
NM_008670	down	MM9LINCRNAEXON12112-	down	0.9285714	0.000396825	MM9LINCRNAEXON12112-	488	66	192	NM_008670	1000	681	807	116	10	+
NM_001081069	down	MM9LINCRNAEXON12112-	down	0.7857143	0.005505952	MM9LINCRNAEXON12112-	488	64	197	NM_001081069	1000	323	460	124	9	+
NM_177182	down	MM9LINCRNAEXON12112-	down	0.7857143	0.005505952	MM9LINCRNAEXON12112-	488	81	205	NM_177182	1000	362	470	100	7	-
NM_172603	down	MM9LINCRNAEXON12112-	down	0.8571429	0.001736111	MM9LINCRNAEXON12112-	488	66	181	NM_172603	1000	186	301	107	8	-
NM_053190	down	MM9LINCRNAEXON12112-	down	0.6428571	0.03115079	MM9LINCRNAEXON12112-	488	71	219	NM_053190	1000	219	364	138	7	-
NM_008461	down	MM9LINCRNAEXON12112-	down	0.6428571	0.03115079	MM9LINCRNAEXON12112-	488	66	142	NM_008461	1000	430	508	70	6	-
NM_001198560	down	MM9LINCRNAEXON12112-	down	0.7857143	0.005505952	MM9LINCRNAEXON12112-	488	67	213	NM_001198560	1000	543	683	124	11	-
NM_001164327	down	MM9LINCRNAEXON12112-	down	0.8571429	0.001736111	MM9LINCRNAEXON12112-	488	66	181	NM_001164327	1000	163	278	104	11	-
NM_021718	down	uc007pvz.1	down	0.7857143	0.005505952	uc007pvz.1	7156	4316	4400	NM_021718	1000	102	232	74	2	+
NM_021718	down	uc007pvz.1	down	0.7857143	0.005505952	uc007pvz.1	7156	4328	4439	NM_021718	1000	87	170	61	0	-
NM_011658	down	uc007pvz.1	down	0.7142857	0.0141369	uc007pvz.1	7156	613	660	NM_011658	1000	684	731	46	1	+
NM_011658	down	uc007pvz.1	down	0.7142857	0.0141369	uc007pvz.1	7156	1963	1998	NM_011658	1000	696	731	35	0	-
NM_011616	down	uc007pvz.1	down	0.7142857	0.0141369	uc007pvz.1	7156	613	668	NM_011616	1000	217	272	54	1	+
NM_007974	down	uc007pvz.1	down	0.8571429	0.001736111	uc007pvz.1	7156	1961	1997	NM_007974	1000	254	290	36	0	-
NM_023788	down	uc007pvz.1	down	0.7857143	0.005505952	uc007pvz.1	7156	613	650	NM_023788	1000	835	872	37	0	-
NM_009987	down	uc007pvz.1	down	0.7142857	0.0141369	uc007pvz.1	7156	4414	4456	NM_009987	1000	539	605	40	1	-
NM_198860	down	ENSMUST00000170471	down	0.7142857	0.0141369	ENSMUST00000170471	33104	25975	26022	NM_198860	1000	644	695	43	4	+
NM_011616	down	ENSMUST00000170471	down	0.7857143	0.005505952	ENSMUST00000170471	33104	5415	5457	NM_011616	1000	217	259	41	1	+
NM_013560	down	ENSMUST00000170471	down	0.7857143	0.005505952	ENSMUST00000170471	33104	4514	4596	NM_013560	1000	157	239	77	5	-
NM_008632	down	ENSMUST00000170471	down	0.6428571	0.03115079	ENSMUST00000170471	33104	23084	23148	NM_008632	1000	59	123	63	1	-
NM_198860	down	uc007pps.1	down	0.6428571	0.03115079	uc007pps.1	7710	5087	5133	NM_198860	1000	645	870	45	0	+
NM_033073	down	uc007pps.1	down	0.6428571	0.03115079	uc007pps.1	7710	119	153	NM_033073	1000	485	519	34	0	+
NM_028238	down	uc007pps.1	down	0.6428571	0.03115079	uc007pps.1	7710	3751	3807	NM_028238	1000	155	200	43	0	+
NM_028013	down	uc007pps.1	down	0.7142857	0.0141369	uc007pps.1	7710	2372	2419	NM_028013	1000	551	596	45	0	-
NM_018752	down	uc007pps.1	down	0.7142857	0.0141369	uc007pps.1	7710	2374	2411	NM_018752	1000	848	885	37	0	-
NM_009932	down	uc007pps.1	down	0.6428571	0.03115079	uc007pps.1	7710	2366	2415	NM_009932	1000	291	346	48	1	-
NM_008772	down	uc007pps.1	down	0.9285714	0.000396825	uc007pps.1	7710	2369	2401	NM_008772	1000	854	886	32	0	-
NM_008125	down	uc007pps.1	down	0.7857143	0.005505952	uc007pps.1	7710	2360	5153	NM_008125	1000	666	740	74	0	-
NM_177182	down	ENSMUST00000037976	down	0.7142857	0.0141369	ENSMUST00000037976	5568	2997	3059	NM_177182	1000	389	451	58	4	+
NM_053190	down	ENSMUST00000037976	down	0.7142857	0.0141369	ENSMUST00000037976	5568	2977	3109	NM_053190	1000	253	384	120	11	+
NM_013653	down	ENSMUST00000037976	down	0.7142857	0.0141369	ENSMUST00000037976	5568	2997	3044	NM_013653	1000	953	1000	45	2	+
NM_013653	down	ENSMUST00000037976	down	0.7142857	0.0141369	ENSMUST00000037976	5568	2967	3101	NM_013653	1000	608	743	122	9	-
NM_009910	down	ENSMUST00000037976	down	0.7142857	0.0141369	ENSMUST00000037976	5568	4052	4104	NM_009910	1000	658	710	52	0	+
NM_008772	down	ENSMUST00000037976	down	0.7857143	0.005505952	ENSMUST00000037976	5568	2968	3311	NM_008772	1000	75	776	164	14	+
NM_010194	down	ENSMUST00000037976	down	0.6428571	0.03115079	ENSMUST00000037976	5568	3259	3300	NM_010194	1000	634	675	41	0	-
NM_029658	down	uc007toq.1	down	0.7857143	0.005505952	uc007toq.1	4173	2615	2757	NM_029658	1000	793	935	117	4	+
NM_025355	down	uc007toq.1	down	0.6428571	0.03115079	uc007toq.1	4173	2615	2740	NM_025355	1000	582	704	113	6	+
NM_013653	down	uc007toq.1	down	0.8571429	0.001736111	uc007toq.1	4173	2615	2757	NM_013653	1000	621	758	126	8	+
NM_013653	down	uc007toq.1	down	0.8571429	0.001736111	uc007toq.1	4173	2665	2722	NM_013653	1000	941	1000	56	1	-
NM_001081069	down	uc007toq.1	down	0.7142857	0.0141369	uc007toq.1	4173	2605	2757	NM_001081069	1000	320	470	137	8	+
NM_177182	down	uc007toq.1	down	0.8571429	0.001736111	uc007toq.1	4173	2625	2757	NM_177182	1000	361	470	100	4	-
NM_172603	down	uc007toq.1	down	0.7857143	0.005505952	uc007toq.1	4173	2597	2727	NM_172603	1000	188	312	113	2	-
NM_053190	down	uc007toq.1	down	0.7142857	0.0141369	uc007toq.1	4173	2615	2727	NM_053190	1000	256	364	105	1	-
NM_010746	down	uc007toq.1	down	0.9285714	0.000396825	uc007toq.1	4173	2597	2757	NM_010746	1000	78	225	126	3	-
NM_009127	down	uc007toq.1	down	0.6428571	0.03115079	uc007toq.1	4173	2616	2752	NM_009127	1000	683	817	120	3	-
NM_008772	down	uc007toq.1	down	0.6428571	0.03115079	uc007toq.1	4173	2597	2756	NM_008772	1000	61	212	137	7	-
NM_001164327	down	uc007toq.1	down	0.7857143	0.005505952	uc007toq.1	4173	2615	2747	NM_001164327	1000	134	273	116	3	-
NM_021718	down	uc009egc.1	down	0.7142857	0.0141369	uc009egc.1	6847	5577	5931	NM_021718	1000	38	360	77	2	+
NM_021718	down	uc009egc.1	down	0.7142857	0.0141369	uc009egc.1	6847	5674	5717	NM_021718	1000	97	154	41	1	+
NM_021718	down	uc009egc.1	down	0.7142857	0.0141369	uc009egc.1	6847	5654	5714	NM_021718	1000	97	171	59	1	-
NM_001164329	down	uc009egc.1	down	0.8571429	0.001736111	uc009egc.1	6847	4041	4283	NM_001164329	1000	404	663	139	1	+
NM_172603	down	uc009djr.1	down	0.7142857	0.0141369	uc009djr.1	8585	7583	7727	NM_172603	1000	178	329	130	11	+
NM_172603	down	uc009djr.1	down	0.7142857	0.0141369	uc009djr.1	8585	406	616	NM_172603	1000	228	389	92	5	-
NM_001198560	down	uc009djr.1	down	0.7857143	0.005505952	uc009djr.1	8585	7583	7714	NM_001198560	1000	561	692	121	10	+
NM_001198560	down	uc009djr.1	down	0.7857143	0.005505952	uc009djr.1	8585	525	616	NM_001198560	1000	611	703	85	6	-
NM_182806	down	uc009djr.1	down	0.6428571	0.03115079	uc009djr.1	8585	538	601	NM_182806	1000	937	1000	60	3	+
NM_182806	down	uc009djr.1	down	0.6428571	0.03115079	uc009djr.1	8585	548	616	NM_182806	1000	465	538	67	1	-
NM_029658	down	uc009djr.1	down	0.7142857	0.0141369	uc009djr.1	8585	548	616	NM_029658	1000	793	861	64	4	+
NM_029658	down	uc009djr.1	down	0.7142857	0.0141369	uc009djr.1	8585	7583	7714	NM_029658	1000	780	911	119	12	-
NM_027283	down	uc009djr.1	down	0.7857143	0.005505952	uc009djr.1	8585	526	616	NM_027283	1000	302	393	84	6	+
NM_013653	down	uc009djr.1	down	0.6428571	0.03115079	uc009djr.1	8585	548	4157	NM_013653	1000	621	776	117	6	+
NM_013653	down	uc009djr.1	down	0.6428571	0.03115079	uc009djr.1	8585	7583	7688	NM_013653	1000	634	740	99	6	-
NM_008670	down	uc009djr.1	down	0.7857143	0.005505952	uc009djr.1	8585	528	641	NM_008670	1000	666	806	103	10	+
NM_008670	down	uc009djr.1	down	0.7857143	0.005505952	uc009djr.1	8585	7583	7714	NM_008670	1000	673	805	119	12	-
NM_007974	down	uc009djr.1	down	0.6428571	0.03115079	uc009djr.1	8585	7662	7707	NM_007974	1000	690	816	44	1	+
NM_001081069	down	uc009djr.1	down	0.6428571	0.03115079	uc009djr.1	8585	537	641	NM_001081069	1000	319	450	101	3	+
NM_001081069	down	uc009djr.1	down	0.6428571	0.03115079	uc009djr.1	8585	7583	7737	NM_001081069	1000	288	449	137	9	-
NM_023124	down	uc009djr.1	down	0.7857143	0.005505952	uc009djr.1	8585	498	616	NM_023124	1000	169	279	86	5	-
NM_001164327	down	uc009djr.1	down	0.7142857	0.0141369	uc009djr.1	8585	536	616	NM_001164327	1000	205	285	75	5	-
NM_172603	down	uc007wwx.1	down	0.7142857	0.0141369	uc007wwx.1	8026	5072	5181	NM_172603	1000	188	306	102	7	+
NM_153590	down	uc007wwx.1	down	0.7142857	0.0141369	uc007wwx.1	8026	5072	5182	NM_153590	1000	771	883	93	3	+
NM_053190	down	uc007wwx.1	down	0.7857143	0.005505952	uc007wwx.1	8026	5072	5171	NM_053190	1000	256	364	95	4	+
NM_013653	down	uc007wwx.1	down	0.7857143	0.005505952	uc007wwx.1	8026	5077	5120	NM_013653	1000	941	984	42	1	+
NM_013653	down	uc007wwx.1	down	0.7857143	0.005505952	uc007wwx.1	8026	5072	5171	NM_013653	1000	621	729	84	4	-
NM_013560	down	uc007wwx.1	down	0.7857143	0.005505952	uc007wwx.1	8026	4672	4836	NM_013560	1000	145	327	102	8	+
NM_010746	down	uc007wwx.1	down	0.8571429	0.001736111	uc007wwx.1	8026	5072	5181	NM_010746	1000	101	219	102	7	+
NM_008772	down	uc007wwx.1	down	0.7142857	0.0141369	uc007wwx.1	8026	5072	5176	NM_008772	1000	88	203	96	5	+
NM_001198560	down	uc007wwx.1	down	0.6428571	0.03115079	uc007wwx.1	8026	5072	5175	NM_001198560	1000	571	683	93	7	+
NM_001164327	down	uc007wwx.1	down	0.7142857	0.0141369	uc007wwx.1	8026	5072	5181	NM_001164327	1000	165	283	100	6	+
NM_177078	down	uc007wwx.1	down	0.9285714	0.000396825	uc007wwx.1	8026	5118	5182	NM_177078	1000	930	997	59	4	-
NM_029658	down	uc007wwx.1	down	0.7142857	0.0141369	uc007wwx.1	8026	5072	5171	NM_029658	1000	793	901	96	3	-
NM_008670	down	uc007wwx.1	down	0.7857143	0.005505952	uc007wwx.1	8026	5072	5181	NM_008670	1000	676	794	95	6	-
NM_001081069	down	uc007wwx.1	down	0.6428571	0.03115079	uc007wwx.1	8026	5072	5181	NM_001081069	1000	320	438	104	5	-
NM_008366	down	AK132987	down	0.8571429	0.001736111	AK132987	3185	476	525	NM_008366	1000	523	568	44	0	+
NM_182806	down	ENSMUST00000155817	down	0.7142857	0.0141369	ENSMUST00000155817	11696	4820	4957	NM_182806	1000	398	541	131	6	+
NM_182806	down	ENSMUST00000155817	down	0.7142857	0.0141369	ENSMUST00000155817	11696	4901	4972	NM_182806	1000	932	1000	66	2	-
NM_153590	down	ENSMUST00000155817	down	0.6428571	0.03115079	ENSMUST00000155817	11696	4841	4964	NM_153590	1000	766	882	106	5	+
NM_011658	down	ENSMUST00000155817	down	0.7142857	0.0141369	ENSMUST00000155817	11696	6679	6744	NM_011658	1000	695	760	47	0	+
NM_010194	down	ENSMUST00000155817	down	0.6428571	0.03115079	ENSMUST00000155817	11696	6697	6736	NM_010194	1000	634	673	39	0	+
NM_009127	down	ENSMUST00000155817	down	0.6428571	0.03115079	ENSMUST00000155817	11696	4849	4953	NM_009127	1000	713	817	98	6	+
NM_008461	down	ENSMUST00000155817	down	0.7142857	0.0141369	ENSMUST00000155817	11696	4893	4964	NM_008461	1000	440	514	66	5	+
NM_001163550	down	ENSMUST00000155817	down	0.7857143	0.005505952	ENSMUST00000155817	11696	4700	4964	NM_001163550	1000	575	723	141	6	+
NM_028125	down	ENSMUST00000155817	down	0.7142857	0.0141369	ENSMUST00000155817	11696	4700	4967	NM_028125	1000	802	953	139	12	-
NM_010391	down	ENSMUST00000155817	down	0.7857143	0.005505952	ENSMUST00000155817	11696	6680	6712	NM_010391	1000	18	50	32	0	-
NM_001081069	down	ENSMUST00000155817	down	0.7142857	0.0141369	ENSMUST00000155817	11696	4820	4954	NM_001081069	1000	330	466	123	9	-
NM_001038839	down	ENSMUST00000155817	down	0.9285714	0.000396825	ENSMUST00000155817	11696	4820	4954	NM_001038839	1000	765	896	121	8	-
NM_177182	down	AK035162	down	0.8571429	0.001736111	AK035162	2601	1852	1974	NM_177182	1000	362	470	100	4	+
NM_172603	down	AK035162	down	0.7857143	0.005505952	AK035162	2601	1861	2001	NM_172603	1000	170	313	132	8	+
NM_153590	down	AK035162	down	0.7857143	0.005505952	AK035162	2601	1871	2002	NM_153590	1000	766	888	108	9	+
NM_053190	down	AK035162	down	0.7142857	0.0141369	AK035162	2601	1852	2001	NM_053190	1000	228	381	141	8	+
NM_013653	down	AK035162	down	0.8571429	0.001736111	AK035162	2601	1881	1940	NM_013653	1000	941	1000	57	2	+
NM_013653	down	AK035162	down	0.8571429	0.001736111	AK035162	2601	1856	2002	NM_013653	1000	603	752	136	10	-
NM_010746	down	AK035162	down	0.9285714	0.000396825	AK035162	2601	1856	2002	NM_010746	1000	83	227	135	9	+
NM_009127	down	AK035162	down	0.6428571	0.03115079	AK035162	2601	1871	2002	NM_009127	1000	701	836	119	11	+
NM_008772	down	AK035162	down	0.6428571	0.03115079	AK035162	2601	1851	2002	NM_008772	1000	60	214	145	6	+
NM_001164327	down	AK035162	down	0.7857143	0.005505952	AK035162	2601	1866	1963	NM_001164327	1000	155	252	91	6	+
NM_001101471	down	AK035162	down	0.8571429	0.001736111	AK035162	2601	1889	1942	NM_001101471	1000	434	487	49	4	+
NM_177078	down	AK035162	down	1	4.96E-05	AK035162	2601	1928	1963	NM_177078	1000	965	1000	34	1	-
NM_029658	down	AK035162	down	0.7857143	0.005505952	AK035162	2601	1858	2002	NM_029658	1000	774	917	131	11	-
NM_027283	down	AK035162	down	0.7142857	0.0141369	AK035162	2601	1852	1932	NM_027283	1000	377	458	75	5	-
NM_025355	down	AK035162	down	0.6428571	0.03115079	AK035162	2601	1871	2002	NM_025355	1000	564	695	121	10	-
NM_009910	down	AK035162	down	0.7142857	0.0141369	AK035162	2601	219	278	NM_009910	1000	639	695	55	0	-
NM_008670	down	AK035162	down	0.7142857	0.0141369	AK035162	2601	1866	2002	NM_008670	1000	668	805	126	10	-
NM_008125	down	AK035162	down	0.9285714	0.000396825	AK035162	2601	229	288	NM_008125	1000	644	704	59	0	-
NM_001081069	down	AK035162	down	0.7142857	0.0141369	AK035162	2601	1866	2001	NM_001081069	1000	313	449	127	8	-
NM_020270	down	AK032662	down	0.6428571	0.03115079	AK032662	88676	78221	78374	NM_020270	1000	388	535	83	4	+
NM_016956	down	AK032662	down	0.7857143	0.005505952	AK032662	88676	59835	60049	NM_016956	1000	455	890	83	3	+
NM_001033356	down	AK032662	down	0.6428571	0.03115079	AK032662	88676	16762	16813	NM_001033356	1000	808	864	51	0	+
NM_177182	down	AK032662	down	0.7142857	0.0141369	AK032662	88676	2255	2341	NM_177182	1000	384	470	82	4	+
NM_177182	down	AK032662	down	0.7142857	0.0141369	AK032662	88676	3365	12714	NM_177182	1000	385	470	81	4	+
NM_177182	down	AK032662	down	0.7142857	0.0141369	AK032662	88676	52166	81665	NM_177182	1000	385	471	80	4	+
NM_177182	down	AK032662	down	0.7142857	0.0141369	AK032662	88676	31985	32032	NM_177182	1000	412	459	43	4	+
NM_177182	down	AK032662	down	0.7142857	0.0141369	AK032662	88676	81592	81630	NM_177182	1000	400	438	35	3	+
NM_177182	down	AK032662	down	0.7142857	0.0141369	AK032662	88676	72095	72174	NM_177182	1000	391	470	76	3	-
NM_177182	down	AK032662	down	0.7142857	0.0141369	AK032662	88676	8777	8831	NM_177182	1000	412	467	50	4	-
NM_172442	down	AK032662	down	1	4.96E-05	AK032662	88676	74888	74927	NM_172442	1000	412	451	39	0	+
NM_172442	down	AK032662	down	1	4.96E-05	AK032662	88676	52281	52316	NM_172442	1000	415	450	35	0	+
NM_053190	down	AK032662	down	0.8571429	0.001736111	AK032662	88676	2225	2363	NM_053190	1000	238	376	130	8	+
NM_053190	down	AK032662	down	0.8571429	0.001736111	AK032662	88676	52128	52256	NM_053190	1000	221	359	121	7	+
NM_053190	down	AK032662	down	0.8571429	0.001736111	AK032662	88676	12594	12723	NM_053190	1000	238	363	113	5	+
NM_053190	down	AK032662	down	0.8571429	0.001736111	AK032662	88676	31985	32032	NM_053190	1000	296	343	43	4	+
NM_053190	down	AK032662	down	0.8571429	0.001736111	AK032662	88676	71626	71705	NM_053190	1000	221	288	56	1	+
NM_053190	down	AK032662	down	0.8571429	0.001736111	AK032662	88676	3419	3452	NM_053190	1000	329	362	32	1	+
NM_053190	down	AK032662	down	0.8571429	0.001736111	AK032662	88676	44210	44352	NM_053190	1000	22	382	115	7	-
NM_053190	down	AK032662	down	0.8571429	0.001736111	AK032662	88676	8769	8831	NM_053190	1000	296	364	57	5	-
NM_053190	down	AK032662	down	0.8571429	0.001736111	AK032662	88676	57120	57152	NM_053190	1000	275	307	31	1	-
NM_027321	down	AK032662	down	0.8571429	0.001736111	AK032662	88676	18357	33802	NM_027321	1000	236	817	136	7	+
NM_027321	down	AK032662	down	0.8571429	0.001736111	AK032662	88676	33503	33542	NM_027321	1000	244	283	39	0	-
NM_018752	down	AK032662	down	0.7142857	0.0141369	AK032662	88676	18365	18413	NM_018752	1000	59	129	47	1	+
NM_013753	down	AK032662	down	0.7142857	0.0141369	AK032662	88676	35727	45115	NM_013753	1000	289	691	198	15	+
NM_013753	down	AK032662	down	0.7142857	0.0141369	AK032662	88676	77594	77628	NM_013753	1000	396	430	34	0	+
NM_013753	down	AK032662	down	0.7142857	0.0141369	AK032662	88676	79010	79044	NM_013753	1000	287	321	33	1	+
NM_013521	down	AK032662	down	0.7142857	0.0141369	AK032662	88676	40214	40255	NM_013521	1000	939	980	41	0	+
NM_013521	down	AK032662	down	0.7142857	0.0141369	AK032662	88676	18349	18390	NM_013521	1000	939	981	41	0	+
NM_010746	down	AK032662	down	0.6428571	0.03115079	AK032662	88676	52132	52256	NM_010746	1000	79	204	116	7	+
NM_010746	down	AK032662	down	0.6428571	0.03115079	AK032662	88676	12592	12723	NM_010746	1000	80	208	115	7	+
NM_010746	down	AK032662	down	0.6428571	0.03115079	AK032662	88676	3350	3452	NM_010746	1000	99	207	81	3	+
NM_010746	down	AK032662	down	0.6428571	0.03115079	AK032662	88676	8769	8831	NM_010746	1000	141	209	56	6	-
NM_010746	down	AK032662	down	0.6428571	0.03115079	AK032662	88676	57120	57152	NM_010746	1000	120	152	31	1	-
NM_009932	down	AK032662	down	0.6428571	0.03115079	AK032662	88676	18383	18787	NM_009932	1000	29	373	188	5	+
NM_009932	down	AK032662	down	0.6428571	0.03115079	AK032662	88676	18420	38134	NM_009932	1000	26	344	200	2	+
NM_009932	down	AK032662	down	0.6428571	0.03115079	AK032662	88676	18351	18541	NM_009932	1000	77	354	126	2	+
NM_009932	down	AK032662	down	0.6428571	0.03115079	AK032662	88676	18355	18446	NM_009932	1000	164	349	77	3	+
NM_009932	down	AK032662	down	0.6428571	0.03115079	AK032662	88676	18421	18563	NM_009932	1000	89	226	75	1	+
NM_009932	down	AK032662	down	0.6428571	0.03115079	AK032662	88676	38037	38171	NM_009932	1000	59	316	52	1	+
NM_009932	down	AK032662	down	0.6428571	0.03115079	AK032662	88676	86489	86522	NM_009932	1000	77	113	33	0	+
NM_009932	down	AK032662	down	0.6428571	0.03115079	AK032662	88676	77594	77628	NM_009932	1000	87	139	34	0	-
NM_009799	down	AK032662	down	0.6428571	0.03115079	AK032662	88676	18496	38171	NM_009799	1000	595	736	66	1	+
NM_008772	down	AK032662	down	0.9285714	0.000396825	AK032662	88676	2225	52312	NM_008772	1000	70	886	220	10	+
NM_008772	down	AK032662	down	0.9285714	0.000396825	AK032662	88676	52128	64435	NM_008772	1000	61	775	162	10	+
NM_008772	down	AK032662	down	0.9285714	0.000396825	AK032662	88676	3419	12236	NM_008772	1000	161	878	58	1	+
NM_008772	down	AK032662	down	0.9285714	0.000396825	AK032662	88676	72064	72222	NM_008772	1000	56	216	145	9	-
NM_008772	down	AK032662	down	0.9285714	0.000396825	AK032662	88676	8769	8831	NM_008772	1000	128	196	56	6	-
NM_008685	down	AK032662	down	0.6428571	0.03115079	AK032662	88676	52132	52173	NM_008685	1000	451	490	37	0	+
NM_008125	down	AK032662	down	0.7857143	0.005505952	AK032662	88676	39603	40256	NM_008125	1000	582	735	95	0	+
NM_008125	down	AK032662	down	0.7857143	0.005505952	AK032662	88676	51899	51962	NM_008125	1000	671	734	63	0	+
NM_008125	down	AK032662	down	0.7857143	0.005505952	AK032662	88676	38133	38170	NM_008125	1000	697	734	35	2	+
NM_008125	down	AK032662	down	0.7857143	0.005505952	AK032662	88676	38067	38106	NM_008125	1000	697	734	35	1	+
NM_001164423	down	AK032662	down	0.7857143	0.005505952	AK032662	88676	64390	64430	NM_001164423	1000	573	613	40	0	+
NM_001083957	down	AK032662	down	0.6428571	0.03115079	AK032662	88676	18496	38171	NM_001083957	1000	595	736	76	1	+
NM_001035531	down	AK032662	down	0.7142857	0.0141369	AK032662	88676	28068	28185	NM_001035531	1000	68	163	86	1	-
NM_001035531	down	AK032662	down	0.7142857	0.0141369	AK032662	88676	27919	27966	NM_001035531	1000	64	114	44	2	-
NM_001035531	down	AK032662	down	0.7142857	0.0141369	AK032662	88676	27953	27996	NM_001035531	1000	73	164	43	0	-
NM_053153	down	AK032662	down	0.6428571	0.03115079	AK032662	88676	27973	28133	NM_053153	1000	473	655	150	6	-
NM_053153	down	AK032662	down	0.6428571	0.03115079	AK032662	88676	27927	81574	NM_053153	1000	507	654	125	1	-
NM_053153	down	AK032662	down	0.6428571	0.03115079	AK032662	88676	81414	81574	NM_053153	1000	515	629	96	1	-
NM_053153	down	AK032662	down	0.6428571	0.03115079	AK032662	88676	27986	28054	NM_053153	1000	562	626	60	3	-
NM_053153	down	AK032662	down	0.6428571	0.03115079	AK032662	88676	81420	81497	NM_053153	1000	562	636	63	2	-
NM_053153	down	AK032662	down	0.6428571	0.03115079	AK032662	88676	28003	28069	NM_053153	1000	583	653	58	2	-
NM_010646	down	AK032662	down	0.6428571	0.03115079	AK032662	88676	27927	28133	NM_010646	1000	765	946	152	3	-
NM_010646	down	AK032662	down	0.6428571	0.03115079	AK032662	88676	54463	81574	NM_010646	1000	807	947	121	2	-
NM_010646	down	AK032662	down	0.6428571	0.03115079	AK032662	88676	81414	81477	NM_010646	1000	854	921	61	1	-
NM_145133	down	AK032662	down	0.8571429	0.001736111	AK032662	88676	18515	18569	NM_145133	1000	278	334	54	0	-
NM_011852	down	AK032662	down	0.7857143	0.005505952	AK032662	88676	40215	40257	NM_011852	1000	40	82	42	0	-
NM_011852	down	AK032662	down	0.7857143	0.005505952	AK032662	88676	18360	18407	NM_011852	1000	35	84	47	0	-
NM_011852	down	AK032662	down	0.7857143	0.005505952	AK032662	88676	18389	18457	NM_011852	1000	35	85	47	2	-
NM_133203	down	ENSMUST00000125056	down	0.8571429	0.001736111	ENSMUST00000125056	14109	7786	7846	NM_133203	1000	732	802	60	0	+
NM_029554	down	ENSMUST00000125056	down	0.8571429	0.001736111	ENSMUST00000125056	14109	7801	7847	NM_029554	1000	701	753	46	0	+
NM_018752	down	ENSMUST00000125056	down	0.7142857	0.0141369	ENSMUST00000125056	14109	13317	13357	NM_018752	1000	59	112	40	0	+
NM_013753	down	ENSMUST00000125056	down	0.7142857	0.0141369	ENSMUST00000125056	14109	13301	13346	NM_013753	1000	275	320	43	2	+
NM_013521	down	ENSMUST00000125056	down	0.7142857	0.0141369	ENSMUST00000125056	14109	13296	13342	NM_013521	1000	940	986	44	2	+
NM_013521	down	ENSMUST00000125056	down	0.7142857	0.0141369	ENSMUST00000125056	14109	7796	7836	NM_013521	1000	405	445	40	0	-
NM_009378	down	ENSMUST00000125056	down	0.8571429	0.001736111	ENSMUST00000125056	14109	6932	6974	NM_009378	1000	694	736	42	0	+
NM_008772	down	ENSMUST00000125056	down	0.6428571	0.03115079	ENSMUST00000125056	14109	13302	13357	NM_008772	1000	719	774	53	2	+
NM_008772	down	ENSMUST00000125056	down	0.6428571	0.03115079	ENSMUST00000125056	14109	13301	13355	NM_008772	1000	452	506	52	2	-
NM_008090	down	ENSMUST00000125056	down	0.7142857	0.0141369	ENSMUST00000125056	14109	13313	13356	NM_008090	1000	601	644	41	2	+
NM_008090	down	ENSMUST00000125056	down	0.7142857	0.0141369	ENSMUST00000125056	14109	13297	13340	NM_008090	1000	601	644	41	2	+
NM_001083957	down	ENSMUST00000125056	down	0.7857143	0.005505952	ENSMUST00000125056	14109	13289	13356	NM_001083957	1000	572	639	61	6	+
NM_001083957	down	ENSMUST00000125056	down	0.7857143	0.005505952	ENSMUST00000125056	14109	13289	13356	NM_001083957	1000	586	659	62	4	+
NM_145133	down	ENSMUST00000125056	down	0.7142857	0.0141369	ENSMUST00000125056	14109	13289	13342	NM_145133	1000	279	332	50	3	-
NM_027788	down	ENSMUST00000125056	down	0.7142857	0.0141369	ENSMUST00000125056	14109	6917	6959	NM_027788	1000	153	195	42	0	-
NM_011658	down	ENSMUST00000125056	down	0.7142857	0.0141369	ENSMUST00000125056	14109	13290	13336	NM_011658	1000	685	731	44	2	-
NM_010194	down	ENSMUST00000125056	down	0.6428571	0.03115079	ENSMUST00000125056	14109	13289	13325	NM_010194	1000	633	669	34	2	-
NM_001035531	down	uc008sue.1	down	0.6428571	0.03115079	uc008sue.1	31009	30961	31005	NM_001035531	1000	38	82	44	0	+
NM_177078	down	uc008sue.1	down	0.6428571	0.03115079	uc008sue.1	31009	7108	7181	NM_177078	1000	926	1000	67	4	+
NM_177078	down	uc008sue.1	down	0.6428571	0.03115079	uc008sue.1	31009	13090	13151	NM_177078	1000	925	987	55	6	-
NM_053190	down	uc008sue.1	down	0.6428571	0.03115079	uc008sue.1	31009	2151	2297	NM_053190	1000	219	365	137	9	-
NM_053190	down	uc008sue.1	down	0.6428571	0.03115079	uc008sue.1	31009	7183	7238	NM_053190	1000	225	277	49	3	-
NM_009378	down	uc008sue.1	down	0.7857143	0.005505952	uc008sue.1	31009	29280	29317	NM_009378	1000	697	734	37	0	-
NM_001101471	down	uc008sue.1	down	0.6428571	0.03115079	uc008sue.1	31009	29356	29436	NM_001101471	1000	439	778	68	5	-
NM_001033978	down	uc008sue.1	down	0.7857143	0.005505952	uc008sue.1	31009	30522	30565	NM_001033978	1000	114	157	43	0	-
NM_001166376	down	AK041193	down	0.7142857	0.0141369	AK041193	10466	7936	8486	NM_001166376	1000	153	704	526	24	-
NM_053190	down	ENSMUST00000131146	down	0.6428571	0.03115079	ENSMUST00000131146	1540	600	741	NM_053190	1000	244	380	126	10	-
NM_172530	down	uc007mpy.1	down	0.7142857	0.0141369	uc007mpy.1	6295	460	657	NM_172530	1000	442	518	53	0	+
NM_053153	down	uc007mpy.1	down	0.7857143	0.005505952	uc007mpy.1	6295	1212	1314	NM_053153	1000	24	127	71	2	+
NM_010780	down	uc007mpy.1	down	0.7857143	0.005505952	uc007mpy.1	6295	4883	4929	NM_010780	1000	293	339	46	0	+
NM_010646	down	uc007mpy.1	down	0.6428571	0.03115079	uc007mpy.1	6295	1212	1314	NM_010646	1000	316	419	71	2	+
NM_010646	down	uc007mpy.1	down	0.6428571	0.03115079	uc007mpy.1	6295	1200	1334	NM_010646	1000	903	946	42	1	-
NM_007974	down	uc007mpy.1	down	0.7142857	0.0141369	uc007mpy.1	6295	1050	1223	NM_007974	1000	164	219	55	0	+
NM_014194	down	uc007mpy.1	down	0.6428571	0.03115079	uc007mpy.1	6295	1194	1241	NM_014194	1000	710	757	47	0	-
NM_014194	down	uc007mpy.1	down	0.6428571	0.03115079	uc007mpy.1	6295	1266	1336	NM_014194	1000	707	765	46	1	-
NM_011658	down	uc007mpy.1	down	0.7142857	0.0141369	uc007mpy.1	6295	4881	4929	NM_011658	1000	686	734	47	1	-
NM_008366	down	uc007mpy.1	down	0.7142857	0.0141369	uc007mpy.1	6295	2030	2071	NM_008366	1000	527	566	38	0	-
NM_011658	down	AK016410	down	0.7857143	0.005505952	AK016410	15336	13202	13249	NM_011658	1000	685	732	46	1	+
NM_011616	down	AK016410	down	0.7857143	0.005505952	AK016410	15336	6812	13248	NM_011616	1000	191	278	85	2	+
NM_011616	down	AK016410	down	0.7857143	0.005505952	AK016410	15336	13162	13234	NM_011616	1000	204	278	69	3	+
NM_011616	down	AK016410	down	0.7857143	0.005505952	AK016410	15336	4100	4330	NM_011616	1000	100	238	122	4	-
NM_001033978	down	AK016410	down	0.7857143	0.005505952	AK016410	15336	6812	6866	NM_001033978	1000	115	169	53	1	+
NM_001033978	down	AK016410	down	0.7857143	0.005505952	AK016410	15336	5874	5926	NM_001033978	1000	115	167	50	2	-
NM_001025577	down	AK016410	down	0.6428571	0.03115079	AK016410	15336	13198	13242	NM_001025577	1000	309	353	43	1	+
NM_172442	down	AK016410	down	0.6428571	0.03115079	AK016410	15336	5879	5916	NM_172442	1000	413	450	37	0	+
NM_053153	down	AK016410	down	0.7142857	0.0141369	AK016410	15336	4279	4336	NM_053153	1000	558	611	51	2	+
NM_027321	down	AK016410	down	0.7857143	0.005505952	AK016410	15336	5874	5918	NM_027321	1000	238	282	43	1	+
NM_027321	down	AK016410	down	0.7857143	0.005505952	AK016410	15336	6794	6838	NM_027321	1000	238	282	44	0	-
NM_023788	down	AK016410	down	0.7142857	0.0141369	AK016410	15336	5882	5919	NM_023788	1000	836	873	37	0	+
NM_023788	down	AK016410	down	0.7142857	0.0141369	AK016410	15336	6793	6831	NM_023788	1000	835	873	38	0	-
NM_018752	down	AK016410	down	0.7857143	0.005505952	AK016410	15336	5882	5927	NM_018752	1000	61	121	44	1	+
NM_018752	down	AK016410	down	0.7857143	0.005505952	AK016410	15336	13172	13233	NM_018752	1000	59	129	54	2	-
NM_018752	down	AK016410	down	0.7857143	0.005505952	AK016410	15336	13192	13248	NM_018752	1000	62	129	50	1	-
NM_018752	down	AK016410	down	0.7857143	0.005505952	AK016410	15336	6792	6832	NM_018752	1000	59	114	39	1	-
NM_013753	down	AK016410	down	0.6428571	0.03115079	AK016410	15336	13172	13316	NM_013753	1000	388	474	55	2	+
NM_013521	down	AK016410	down	0.6428571	0.03115079	AK016410	15336	4139	14322	NM_013521	1000	404	985	122	2	+
NM_010649	down	AK016410	down	0.7857143	0.005505952	AK016410	15336	4279	4336	NM_010649	1000	843	896	51	2	+
NM_010646	down	AK016410	down	0.8571429	0.001736111	AK016410	15336	4279	4336	NM_010646	1000	850	903	51	2	+
NM_009932	down	AK016410	down	0.7142857	0.0141369	AK016410	15336	14258	14321	NM_009932	1000	77	150	53	1	+
NM_009932	down	AK016410	down	0.7142857	0.0141369	AK016410	15336	13175	13248	NM_009932	1000	29	112	72	1	-
NM_009932	down	AK016410	down	0.7142857	0.0141369	AK016410	15336	13163	13213	NM_009932	1000	30	85	47	2	-
NM_009378	down	AK016410	down	0.7857143	0.005505952	AK016410	15336	5891	5921	NM_009378	1000	694	724	30	0	+
NM_008090	down	AK016410	down	0.7857143	0.005505952	AK016410	15336	5881	5928	NM_008090	1000	600	643	42	0	+
NM_001083957	down	AK016410	down	0.7142857	0.0141369	AK016410	15336	5874	5924	NM_001083957	1000	588	640	48	2	+
NM_001083957	down	AK016410	down	0.7142857	0.0141369	AK016410	15336	13155	13250	NM_001083957	1000	557	875	94	1	-
NM_001083957	down	AK016410	down	0.7142857	0.0141369	AK016410	15336	6795	6867	NM_001083957	1000	609	681	64	4	-
NM_001083957	down	AK016410	down	0.7142857	0.0141369	AK016410	15336	13186	13237	NM_001083957	1000	610	665	49	2	-
NM_030682	down	AK016410	down	0.6428571	0.03115079	AK016410	15336	6258	6311	NM_030682	1000	196	249	53	0	-
NM_001166376	down	AK016410	down	0.7857143	0.005505952	AK016410	15336	2627	3166	NM_001166376	1000	154	704	463	40	-
NM_009910	down	AK016410	down	0.6428571	0.03115079	AK016410	15336	4139	4194	NM_009910	1000	652	711	52	2	-
NM_010391	down	AK016410	down	0.7142857	0.0141369	AK016410	15336	13182	13214	NM_010391	1000	17	49	31	1	-
NM_010194	down	AK016410	down	0.7142857	0.0141369	AK016410	15336	14260	14313	NM_010194	1000	634	689	51	1	-
NM_008632	down	AK016410	down	0.6428571	0.03115079	AK016410	15336	13185	13249	NM_008632	1000	57	121	62	2	-
NM_182806	down	uc009tha.1	down	0.8571429	0.001736111	uc009tha.1	3735	2528	2591	NM_182806	1000	937	1000	61	2	+
NM_182806	down	uc009tha.1	down	0.8571429	0.001736111	uc009tha.1	3735	2537	2671	NM_182806	1000	398	539	128	6	-
NM_028125	down	uc009tha.1	down	0.7142857	0.0141369	uc009tha.1	3735	2525	2693	NM_028125	1000	802	958	143	10	+
NM_025355	down	uc009tha.1	down	0.7857143	0.005505952	uc009tha.1	3735	2526	2633	NM_025355	1000	570	677	100	7	+
NM_001038839	down	uc009tha.1	down	0.6428571	0.03115079	uc009tha.1	3735	2526	2684	NM_001038839	1000	753	909	148	8	+
NM_172603	down	uc009tha.1	down	0.6428571	0.03115079	uc009tha.1	3735	2525	2665	NM_172603	1000	169	309	131	9	-
NM_153590	down	uc009tha.1	down	0.6428571	0.03115079	uc009tha.1	3735	2525	2651	NM_153590	1000	766	882	109	7	-
NM_144847	down	uc009tha.1	down	0.9285714	0.000396825	uc009tha.1	3735	2539	2639	NM_144847	1000	139	239	90	10	-
NM_023124	down	uc009tha.1	down	0.7142857	0.0141369	uc009tha.1	3735	2525	2634	NM_023124	1000	141	262	104	5	-
NM_010304	down	uc009tha.1	down	0.7142857	0.0141369	uc009tha.1	3735	2518	2675	NM_010304	1000	755	912	143	14	-
NM_009978	down	uc009tha.1	down	0.7857143	0.005505952	uc009tha.1	3735	2653	2694	NM_009978	1000	397	436	39	0	-
NM_001164327	down	uc009tha.1	down	0.6428571	0.03115079	uc009tha.1	3735	2525	2644	NM_001164327	1000	167	286	111	8	-
NM_008685	down	uc007sma.1	down	0.6428571	0.03115079	uc007sma.1	471681	185482	185609	NM_008685	1000	461	591	115	12	+
NM_008685	down	uc007sma.1	down	0.6428571	0.03115079	uc007sma.1	471681	132350	132393	NM_008685	1000	955	998	41	2	+
NM_053190	down	uc007sma.1	down	0.7142857	0.0141369	uc007sma.1	471681	243865	244020	NM_053190	1000	232	386	145	9	+
NM_053190	down	uc007sma.1	down	0.7142857	0.0141369	uc007sma.1	471681	217573	217719	NM_053190	1000	219	365	134	12	+
NM_053190	down	uc007sma.1	down	0.7142857	0.0141369	uc007sma.1	471681	185481	185617	NM_053190	1000	245	381	127	8	+
NM_053190	down	uc007sma.1	down	0.7142857	0.0141369	uc007sma.1	471681	392169	392309	NM_053190	1000	232	372	132	8	-
NM_053190	down	uc007sma.1	down	0.7142857	0.0141369	uc007sma.1	471681	205772	205930	NM_053190	1000	221	380	146	9	-
NM_053190	down	uc007sma.1	down	0.7142857	0.0141369	uc007sma.1	471681	132349	132441	NM_053190	1000	273	365	88	4	-
NM_053190	down	uc007sma.1	down	0.7142857	0.0141369	uc007sma.1	471681	21804	21863	NM_053190	1000	257	304	45	2	-
NM_001081079	down	uc007sma.1	down	0.7142857	0.0141369	uc007sma.1	471681	415907	415943	NM_001081079	1000	846	882	34	2	+
NM_001081079	down	uc007sma.1	down	0.7142857	0.0141369	uc007sma.1	471681	259095	270065	NM_001081079	1000	814	977	151	12	-
NM_019985	down	uc007sma.1	down	0.6428571	0.03115079	uc007sma.1	471681	294870	294955	NM_019985	1000	334	419	84	1	+
NM_019985	down	uc007sma.1	down	0.6428571	0.03115079	uc007sma.1	471681	354567	354610	NM_019985	1000	364	419	42	1	-
NM_016956	down	uc007sma.1	down	0.6428571	0.03115079	uc007sma.1	471681	392908	415890	NM_016956	1000	457	550	80	1	+
NM_016956	down	uc007sma.1	down	0.6428571	0.03115079	uc007sma.1	471681	103003	103056	NM_016956	1000	449	500	49	2	-
NM_145133	down	uc007sma.1	down	0.7142857	0.0141369	uc007sma.1	471681	32073	32122	NM_145133	1000	287	336	49	0	+
NM_145133	down	uc007sma.1	down	0.7142857	0.0141369	uc007sma.1	471681	302572	302626	NM_145133	1000	281	335	54	0	+
NM_145133	down	uc007sma.1	down	0.7142857	0.0141369	uc007sma.1	471681	110889	111060	NM_145133	1000	279	336	56	1	+
NM_145133	down	uc007sma.1	down	0.7142857	0.0141369	uc007sma.1	471681	110911	110964	NM_145133	1000	291	334	42	0	+
NM_145133	down	uc007sma.1	down	0.7142857	0.0141369	uc007sma.1	471681	337131	337187	NM_145133	1000	278	334	56	0	-
NM_145133	down	uc007sma.1	down	0.7142857	0.0141369	uc007sma.1	471681	323954	324005	NM_145133	1000	279	330	51	0	-
NM_145133	down	uc007sma.1	down	0.7142857	0.0141369	uc007sma.1	471681	85071	85119	NM_145133	1000	288	336	47	1	-
NM_145133	down	uc007sma.1	down	0.7142857	0.0141369	uc007sma.1	471681	158545	158599	NM_145133	1000	285	337	51	1	-
NM_145133	down	uc007sma.1	down	0.7142857	0.0141369	uc007sma.1	471681	357149	357204	NM_145133	1000	284	335	50	0	-
NM_145133	down	uc007sma.1	down	0.7142857	0.0141369	uc007sma.1	471681	85029	85088	NM_145133	1000	279	334	52	1	-
NM_145133	down	uc007sma.1	down	0.7142857	0.0141369	uc007sma.1	471681	241012	241077	NM_145133	1000	2	336	51	0	-
NM_145133	down	uc007sma.1	down	0.7142857	0.0141369	uc007sma.1	471681	85085	234821	NM_145133	1000	280	336	56	0	-
NM_011852	down	uc007sma.1	down	0.6428571	0.03115079	uc007sma.1	471681	42235	42280	NM_011852	1000	39	84	45	0	+
NM_011852	down	uc007sma.1	down	0.6428571	0.03115079	uc007sma.1	471681	111007	111053	NM_011852	1000	38	84	45	1	+
NM_011852	down	uc007sma.1	down	0.6428571	0.03115079	uc007sma.1	471681	40049	40093	NM_011852	1000	40	84	44	0	+
NM_011852	down	uc007sma.1	down	0.6428571	0.03115079	uc007sma.1	471681	35609	35652	NM_011852	1000	38	81	43	0	+
NM_011852	down	uc007sma.1	down	0.6428571	0.03115079	uc007sma.1	471681	271540	271580	NM_011852	1000	41	81	40	0	+
NM_011852	down	uc007sma.1	down	0.6428571	0.03115079	uc007sma.1	471681	403429	403468	NM_011852	1000	37	76	39	0	+
NM_011852	down	uc007sma.1	down	0.6428571	0.03115079	uc007sma.1	471681	110907	110963	NM_011852	1000	38	84	45	0	+
NM_011852	down	uc007sma.1	down	0.6428571	0.03115079	uc007sma.1	471681	110820	110875	NM_011852	1000	39	84	44	0	+
NM_011852	down	uc007sma.1	down	0.6428571	0.03115079	uc007sma.1	471681	404414	404463	NM_011852	1000	35	84	49	0	-
NM_011852	down	uc007sma.1	down	0.6428571	0.03115079	uc007sma.1	471681	184506	184554	NM_011852	1000	35	83	48	0	-
NM_011852	down	uc007sma.1	down	0.6428571	0.03115079	uc007sma.1	471681	97482	97524	NM_011852	1000	41	83	42	0	-
NM_011852	down	uc007sma.1	down	0.6428571	0.03115079	uc007sma.1	471681	132494	132547	NM_011852	1000	35	77	42	0	-
NM_001033978	down	uc007sma.1	down	0.7142857	0.0141369	uc007sma.1	471681	40052	40099	NM_001033978	1000	115	162	47	0	+
NM_001033978	down	uc007sma.1	down	0.7142857	0.0141369	uc007sma.1	471681	232299	232352	NM_001033978	1000	104	155	50	0	+
NM_001033978	down	uc007sma.1	down	0.7142857	0.0141369	uc007sma.1	471681	111011	111058	NM_001033978	1000	122	169	46	1	+
NM_001033978	down	uc007sma.1	down	0.7142857	0.0141369	uc007sma.1	471681	110826	110967	NM_001033978	1000	115	174	58	0	+
NM_001033978	down	uc007sma.1	down	0.7142857	0.0141369	uc007sma.1	471681	32171	32219	NM_001033978	1000	115	160	45	0	+
NM_001033978	down	uc007sma.1	down	0.7142857	0.0141369	uc007sma.1	471681	158415	158456	NM_001033978	1000	130	175	41	0	+
NM_001033978	down	uc007sma.1	down	0.7142857	0.0141369	uc007sma.1	471681	32236	32294	NM_001033978	1000	127	171	42	2	+
NM_001033978	down	uc007sma.1	down	0.7142857	0.0141369	uc007sma.1	471681	404405	404456	NM_001033978	1000	116	167	50	1	-
NM_001033978	down	uc007sma.1	down	0.7142857	0.0141369	uc007sma.1	471681	253171	253211	NM_001033978	1000	121	161	40	0	-
NM_001033978	down	uc007sma.1	down	0.7142857	0.0141369	uc007sma.1	471681	158562	158599	NM_001033978	1000	136	173	36	1	-
NM_172442	down	uc007sma.1	down	0.8571429	0.001736111	uc007sma.1	471681	404410	404447	NM_172442	1000	413	450	37	0	+
NM_172442	down	uc007sma.1	down	0.8571429	0.001736111	uc007sma.1	471681	242994	243030	NM_172442	1000	414	450	36	0	+
NM_172442	down	uc007sma.1	down	0.8571429	0.001736111	uc007sma.1	471681	85004	85058	NM_172442	1000	307	451	44	0	+
NM_172442	down	uc007sma.1	down	0.8571429	0.001736111	uc007sma.1	471681	40062	40420	NM_172442	1000	326	450	67	0	-
NM_172442	down	uc007sma.1	down	0.8571429	0.001736111	uc007sma.1	471681	110926	111058	NM_172442	1000	312	450	62	0	-
NM_172442	down	uc007sma.1	down	0.8571429	0.001736111	uc007sma.1	471681	111014	111051	NM_172442	1000	413	450	37	0	-
NM_172442	down	uc007sma.1	down	0.8571429	0.001736111	uc007sma.1	471681	232310	232346	NM_172442	1000	416	452	36	0	-
NM_172442	down	uc007sma.1	down	0.8571429	0.001736111	uc007sma.1	471681	110836	110883	NM_172442	1000	413	450	36	0	-
NM_028444	down	uc007sma.1	down	0.6428571	0.03115079	uc007sma.1	471681	166329	166363	NM_028444	1000	604	638	33	1	+
NM_027321	down	uc007sma.1	down	0.7142857	0.0141369	uc007sma.1	471681	357149	357198	NM_027321	1000	235	284	48	1	+
NM_027321	down	uc007sma.1	down	0.7142857	0.0141369	uc007sma.1	471681	85071	85118	NM_027321	1000	234	281	46	1	+
NM_027321	down	uc007sma.1	down	0.7142857	0.0141369	uc007sma.1	471681	15597	15627	NM_027321	1000	252	282	30	0	+
NM_027321	down	uc007sma.1	down	0.7142857	0.0141369	uc007sma.1	471681	426972	470234	NM_027321	1000	233	767	105	2	-
NM_027321	down	uc007sma.1	down	0.7142857	0.0141369	uc007sma.1	471681	32075	32122	NM_027321	1000	234	281	47	0	-
NM_027321	down	uc007sma.1	down	0.7142857	0.0141369	uc007sma.1	471681	42237	42281	NM_027321	1000	238	282	44	0	-
NM_027321	down	uc007sma.1	down	0.7142857	0.0141369	uc007sma.1	471681	110954	111000	NM_027321	1000	236	282	44	2	-
NM_027321	down	uc007sma.1	down	0.7142857	0.0141369	uc007sma.1	471681	276919	276958	NM_027321	1000	233	272	39	0	-
NM_027321	down	uc007sma.1	down	0.7142857	0.0141369	uc007sma.1	471681	158412	158455	NM_027321	1000	241	284	43	0	-
NM_027321	down	uc007sma.1	down	0.7142857	0.0141369	uc007sma.1	471681	374942	374986	NM_027321	1000	254	302	42	0	-
NM_009987	down	uc007sma.1	down	0.7142857	0.0141369	uc007sma.1	471681	323982	339591	NM_009987	1000	540	648	72	3	+
NM_009987	down	uc007sma.1	down	0.7142857	0.0141369	uc007sma.1	471681	356976	357056	NM_009987	1000	540	592	48	2	+
NM_009987	down	uc007sma.1	down	0.7142857	0.0141369	uc007sma.1	471681	302540	302591	NM_009987	1000	540	638	48	2	-
NM_009987	down	uc007sma.1	down	0.7142857	0.0141369	uc007sma.1	471681	407252	407290	NM_009987	1000	540	630	37	1	-
NM_009987	down	uc007sma.1	down	0.7142857	0.0141369	uc007sma.1	471681	157298	157350	NM_009987	1000	533	635	49	1	-
NM_008772	down	uc007sma.1	down	0.7857143	0.005505952	uc007sma.1	471681	217587	357205	NM_008772	1000	65	929	246	11	+
NM_008772	down	uc007sma.1	down	0.7857143	0.005505952	uc007sma.1	471681	91599	184578	NM_008772	1000	105	886	196	10	+
[truncated: 609 more rows]
